# Supplementary material
Source: publisher figshare collection journal article supplement (https://gsajournals.figshare.com/ndownloader/files/23836961)
Supplement: Supplementary file 1 [file 23836961]

## Sheet: Description
Differentially expressed GCNs separated based on the five clusters extracted using NetExtractor.

## Sheet: Cluster_1
GCN Cluster 1
ENSG00000157916	ENSG00000156299
ENSG00000070501	ENSG00000076108
ENSG00000239569	ENSG00000092201
ENSG00000003393	ENSG00000145725
ENSG00000042429	ENSG00000135124
ENSG00000135124	ENSG00000134905
ENSG00000162851	ENSG00000152977
ENSG00000003393	ENSG00000122741
ENSG00000087269	ENSG00000135124
ENSG00000146676	ENSG00000135124
ENSG00000152977	ENSG00000110713
ENSG00000135124	ENSG00000186184
ENSG00000152977	ENSG00000099889
ENSG00000004534	ENSG00000070501
ENSG00000139546	ENSG00000015532
ENSG00000204560	ENSG00000135124
ENSG00000152977	ENSG00000108389
ENSG00000163960	ENSG00000135124
ENSG00000135124	ENSG00000111011
ENSG00000137185	ENSG00000156299
ENSG00000152977	ENSG00000106415
ENSG00000137171	ENSG00000070501
ENSG00000152977	ENSG00000164284
ENSG00000115216	ENSG00000135124
ENSG00000126746	ENSG00000198795
ENSG00000182325	ENSG00000198795
ENSG00000105325	ENSG00000156299
ENSG00000152977	ENSG00000174652
ENSG00000135124	ENSG00000103549
ENSG00000037637	ENSG00000152977
ENSG00000135124	ENSG00000132964
ENSG00000175806	ENSG00000198795
ENSG00000135124	ENSG00000119707
ENSG00000006468	ENSG00000196361
ENSG00000152977	ENSG00000126464
ENSG00000112039	ENSG00000070501
ENSG00000170265	ENSG00000135124
ENSG00000070501	ENSG00000074657
ENSG00000025156	ENSG00000070501
ENSG00000152977	ENSG00000172009
ENSG00000152977	ENSG00000136878
ENSG00000152977	ENSG00000087269
ENSG00000114098	ENSG00000198795
ENSG00000152977	ENSG00000152454
ENSG00000003393	ENSG00000066739
ENSG00000155975	ENSG00000099889
ENSG00000254635	ENSG00000135124
ENSG00000131584	ENSG00000070501
ENSG00000152977	ENSG00000251867
ENSG00000164631	ENSG00000239569
ENSG00000139546	ENSG00000257815
ENSG00000148943	ENSG00000135124
ENSG00000117682	ENSG00000178761
ENSG00000006468	ENSG00000111596
ENSG00000152977	ENSG00000148343
ENSG00000152977	ENSG00000151612
ENSG00000182580	ENSG00000156299
ENSG00000006468	ENSG00000162236
ENSG00000163870	ENSG00000156299
ENSG00000116128	ENSG00000152977
ENSG00000152977	ENSG00000152455
ENSG00000135124	ENSG00000101161
ENSG00000117682	ENSG00000053254
ENSG00000135124	ENSG00000141551
ENSG00000053254	ENSG00000184402
ENSG00000135124	ENSG00000149657
ENSG00000116213	ENSG00000152977
ENSG00000152977	ENSG00000111752
ENSG00000158636	ENSG00000156299
ENSG00000168785	ENSG00000072786
ENSG00000003393	ENSG00000198182
ENSG00000149182	ENSG00000198795
ENSG00000151657	ENSG00000135124
ENSG00000163050	ENSG00000139546
ENSG00000152977	ENSG00000184205
ENSG00000169991	ENSG00000152977
ENSG00000117682	ENSG00000136631
ENSG00000003393	ENSG00000164305
ENSG00000110076	ENSG00000198795
ENSG00000135124	ENSG00000121058
ENSG00000198795	ENSG00000100239
ENSG00000152977	ENSG00000171703
ENSG00000152977	ENSG00000095485
ENSG00000123607	ENSG00000152977
ENSG00000168785	ENSG00000139546
ENSG00000198795	ENSG00000149639
ENSG00000151746	ENSG00000156299
ENSG00000053254	ENSG00000099889
ENSG00000003393	ENSG00000134283
ENSG00000113719	ENSG00000156299
ENSG00000112941	ENSG00000198795
ENSG00000113240	ENSG00000188994
ENSG00000152977	ENSG00000165819
ENSG00000115042	ENSG00000135124
ENSG00000176953	ENSG00000125450
ENSG00000003393	ENSG00000068305
ENSG00000186174	ENSG00000198795
ENSG00000197136	ENSG00000135124
ENSG00000167333	ENSG00000135124
ENSG00000152977	ENSG00000186566
ENSG00000135124	ENSG00000136450
ENSG00000163788	ENSG00000139546
ENSG00000111676	ENSG00000198795
ENSG00000003393	ENSG00000111605
ENSG00000159692	ENSG00000198795
ENSG00000070501	ENSG00000167548
ENSG00000006468	ENSG00000128908
ENSG00000198795	ENSG00000100359
ENSG00000076641	ENSG00000103264
ENSG00000070501	ENSG00000171316
ENSG00000077782	ENSG00000156299
ENSG00000198795	ENSG00000167671
ENSG00000006468	ENSG00000105497
ENSG00000152977	ENSG00000136925
ENSG00000198795	ENSG00000127527
ENSG00000152977	ENSG00000103034
ENSG00000160050	ENSG00000003393
ENSG00000070501	ENSG00000128908
ENSG00000175634	ENSG00000135124
ENSG00000059145	ENSG00000198795
ENSG00000003393	ENSG00000043355
ENSG00000003393	ENSG00000111361
ENSG00000239569	ENSG00000111653
ENSG00000135124	ENSG00000100445
ENSG00000152977	ENSG00000174243
ENSG00000135124	ENSG00000130584
ENSG00000152977	ENSG00000197694
ENSG00000168763	ENSG00000152977
ENSG00000003393	ENSG00000087301
ENSG00000204822	ENSG00000198795
ENSG00000143515	ENSG00000152977
ENSG00000152977	ENSG00000110076
ENSG00000197912	ENSG00000198795
ENSG00000117682	ENSG00000156299
ENSG00000152977	ENSG00000239306
ENSG00000152977	ENSG00000139625
ENSG00000003393	ENSG00000048028
ENSG00000070501	ENSG00000068137
ENSG00000178971	ENSG00000198795
ENSG00000152977	ENSG00000075413
ENSG00000135124	ENSG00000182685
ENSG00000139651	ENSG00000198795
ENSG00000003393	ENSG00000134444
ENSG00000116213	ENSG00000135124
ENSG00000135124	ENSG00000137770
ENSG00000003393	ENSG00000178921
ENSG00000152977	ENSG00000178719
ENSG00000152977	ENSG00000130985
ENSG00000152977	ENSG00000214135
ENSG00000135124	ENSG00000101361
ENSG00000038219	ENSG00000156299
ENSG00000152977	ENSG00000175573
ENSG00000135124	ENSG00000101413
ENSG00000152977	ENSG00000186376
ENSG00000204231	ENSG00000070501
ENSG00000139546	ENSG00000099899
ENSG00000152977	ENSG00000184207
ENSG00000081791	ENSG00000070501
ENSG00000152977	ENSG00000189079
ENSG00000011105	ENSG00000121060
ENSG00000115042	ENSG00000152977
ENSG00000139624	ENSG00000125450
ENSG00000147789	ENSG00000198795
ENSG00000157890	ENSG00000156299
ENSG00000135124	ENSG00000111364
ENSG00000152977	ENSG00000196367
ENSG00000152977	ENSG00000152443
ENSG00000135124	ENSG00000134899
ENSG00000113240	ENSG00000139620
ENSG00000070501	ENSG00000182667
ENSG00000095787	ENSG00000135124
ENSG00000003393	ENSG00000133706
ENSG00000152977	ENSG00000119669
ENSG00000176986	ENSG00000182685
ENSG00000152977	ENSG00000187257
ENSG00000089154	ENSG00000135124
ENSG00000171604	ENSG00000156299
ENSG00000006468	ENSG00000089280
ENSG00000135124	ENSG00000006194
ENSG00000152977	ENSG00000174485
ENSG00000152977	ENSG00000100304
ENSG00000152977	ENSG00000136891
ENSG00000003393	ENSG00000134900
ENSG00000132153	ENSG00000135124
ENSG00000164190	ENSG00000135124
ENSG00000152977	ENSG00000139546
ENSG00000173137	ENSG00000198795
ENSG00000135124	ENSG00000121067
ENSG00000152977	ENSG00000125386
ENSG00000115216	ENSG00000152977
ENSG00000213995	ENSG00000156299
ENSG00000070501	ENSG00000089280
ENSG00000010295	ENSG00000198795
ENSG00000114098	ENSG00000101161
ENSG00000117682	ENSG00000118518
ENSG00000135124	ENSG00000167967
ENSG00000003393	ENSG00000010322
ENSG00000074054	ENSG00000198795
ENSG00000239569	ENSG00000070047
ENSG00000152977	ENSG00000130827
ENSG00000152977	ENSG00000159885
ENSG00000152977	ENSG00000078687
ENSG00000076641	ENSG00000156299
ENSG00000167548	ENSG00000198795
ENSG00000152977	ENSG00000102103
ENSG00000006468	ENSG00000105127
ENSG00000135124	ENSG00000088356
ENSG00000152977	ENSG00000254470
ENSG00000117682	ENSG00000147140
ENSG00000152977	ENSG00000139624
ENSG00000011105	ENSG00000065970
ENSG00000135124	ENSG00000241878
ENSG00000152977	ENSG00000129351
ENSG00000070501	ENSG00000104946
ENSG00000139546	ENSG00000136100
ENSG00000152977	ENSG00000103037
ENSG00000135775	ENSG00000006468
ENSG00000152977	ENSG00000100258
ENSG00000070501	ENSG00000188559
ENSG00000198795	ENSG00000130702
ENSG00000152977	ENSG00000088038
ENSG00000198795	ENSG00000128159
ENSG00000176986	ENSG00000198795
ENSG00000172046	ENSG00000156299
ENSG00000152977	ENSG00000083838
ENSG00000152977	ENSG00000081791
ENSG00000003393	ENSG00000147124
ENSG00000239569	ENSG00000148719
ENSG00000135775	ENSG00000070501
ENSG00000152977	ENSG00000068137
ENSG00000070501	ENSG00000139625
ENSG00000117682	ENSG00000006468
ENSG00000152977	ENSG00000101181
ENSG00000070501	ENSG00000075413
ENSG00000003393	ENSG00000198218
ENSG00000152977	ENSG00000083814
ENSG00000143434	ENSG00000152977
ENSG00000152977	ENSG00000127191
ENSG00000179456	ENSG00000198795
ENSG00000196123	ENSG00000159761
ENSG00000152977	ENSG00000156026
ENSG00000135124	ENSG00000166704
ENSG00000198795	ENSG00000130706
ENSG00000166900	ENSG00000198795
ENSG00000088543	ENSG00000072786
ENSG00000198795	ENSG00000099999
ENSG00000152977	ENSG00000139620
ENSG00000003393	ENSG00000182903
ENSG00000148308	ENSG00000135124
ENSG00000152977	ENSG00000157106
ENSG00000003393	ENSG00000171109
ENSG00000117682	ENSG00000149182
ENSG00000130734	ENSG00000156299
ENSG00000156026	ENSG00000165494
ENSG00000152977	ENSG00000251322
ENSG00000081791	ENSG00000156299
ENSG00000152977	ENSG00000101546
ENSG00000135124	ENSG00000063244
ENSG00000132485	ENSG00000139546
ENSG00000135124	ENSG00000175354
ENSG00000062485	ENSG00000198795
ENSG00000081721	ENSG00000198795
ENSG00000003393	ENSG00000168538
ENSG00000152977	ENSG00000182667
ENSG00000076984	ENSG00000156299
ENSG00000215908	ENSG00000081721
ENSG00000198795	ENSG00000100982
ENSG00000135124	ENSG00000147133
ENSG00000239569	ENSG00000140553
ENSG00000185000	ENSG00000198795
ENSG00000135124	ENSG00000111361
ENSG00000140983	ENSG00000198795
ENSG00000159899	ENSG00000198795
ENSG00000070501	ENSG00000130749
ENSG00000135124	ENSG00000125952
ENSG00000158941	ENSG00000198795
ENSG00000162613	ENSG00000152977
ENSG00000117682	ENSG00000176986
ENSG00000135124	ENSG00000168661
ENSG00000152977	ENSG00000112062
ENSG00000072786	ENSG00000149657
ENSG00000152977	ENSG00000113368
ENSG00000155545	ENSG00000006468
ENSG00000198795	ENSG00000215305
ENSG00000158552	ENSG00000198795
ENSG00000152977	ENSG00000196363
ENSG00000004487	ENSG00000152977
ENSG00000006468	ENSG00000139546
ENSG00000139546	ENSG00000184402
ENSG00000152977	ENSG00000228409
ENSG00000110514	ENSG00000198795
ENSG00000271976	ENSG00000135124
ENSG00000135124	ENSG00000141219
ENSG00000003393	ENSG00000171295
ENSG00000121058	ENSG00000099889
ENSG00000140326	ENSG00000198795
ENSG00000006468	ENSG00000187531
ENSG00000107819	ENSG00000198795
ENSG00000139546	ENSG00000099889
ENSG00000215041	ENSG00000198795
ENSG00000129351	ENSG00000156299
ENSG00000158669	ENSG00000198795
ENSG00000127054	ENSG00000139546
ENSG00000152977	ENSG00000015532
ENSG00000117682	ENSG00000099956
ENSG00000204946	ENSG00000070501
ENSG00000137310	ENSG00000135124
ENSG00000168487	ENSG00000070501
ENSG00000145191	ENSG00000198795
ENSG00000152977	ENSG00000174669
ENSG00000070501	ENSG00000139546
ENSG00000135124	ENSG00000101365
ENSG00000070501	ENSG00000132361
ENSG00000070501	ENSG00000108176
ENSG00000221988	ENSG00000239569
ENSG00000152977	ENSG00000137817
ENSG00000152977	ENSG00000099326
ENSG00000070501	ENSG00000108604
ENSG00000070501	ENSG00000101146
ENSG00000152977	ENSG00000132953
ENSG00000185803	ENSG00000198795
ENSG00000136631	ENSG00000152977
ENSG00000158773	ENSG00000135124
ENSG00000215908	ENSG00000130935
ENSG00000188976	ENSG00000198795
ENSG00000003393	ENSG00000112685
ENSG00000198795	ENSG00000172534
ENSG00000152977	ENSG00000175198
ENSG00000137145	ENSG00000135124
ENSG00000152977	ENSG00000105325
ENSG00000126107	ENSG00000198795
ENSG00000171988	ENSG00000156299
ENSG00000006468	ENSG00000101191
ENSG00000152977	ENSG00000162341
ENSG00000139546	ENSG00000160633
ENSG00000152977	ENSG00000171467
ENSG00000135124	ENSG00000058600
ENSG00000163125	ENSG00000003393
ENSG00000070501	ENSG00000129351
ENSG00000135775	ENSG00000156299
ENSG00000152977	ENSG00000154803
ENSG00000070501	ENSG00000076641
ENSG00000117682	ENSG00000101474
ENSG00000114098	ENSG00000123933
ENSG00000165219	ENSG00000135124
ENSG00000070047	ENSG00000156299
ENSG00000003393	ENSG00000145734
ENSG00000152977	ENSG00000092098
ENSG00000157916	ENSG00000070501
ENSG00000271976	ENSG00000152977
ENSG00000239569	ENSG00000108312
ENSG00000152977	ENSG00000146587
ENSG00000203965	ENSG00000003393
ENSG00000152977	ENSG00000083817
ENSG00000135124	ENSG00000119689
ENSG00000070610	ENSG00000198795
ENSG00000152977	ENSG00000100505
ENSG00000189079	ENSG00000135124
ENSG00000196150	ENSG00000198795
ENSG00000188177	ENSG00000198795
ENSG00000004487	ENSG00000135124
ENSG00000152977	ENSG00000076108
ENSG00000152977	ENSG00000173064
ENSG00000006468	ENSG00000184402
ENSG00000204536	ENSG00000135124
ENSG00000152977	ENSG00000100908
ENSG00000070501	ENSG00000100299
ENSG00000070501	ENSG00000196576
ENSG00000198795	ENSG00000124228
ENSG00000157933	ENSG00000139546
ENSG00000137171	ENSG00000156299
ENSG00000152977	ENSG00000167978
ENSG00000165671	ENSG00000070501
ENSG00000152977	ENSG00000205189
ENSG00000142599	ENSG00000198795
ENSG00000120137	ENSG00000135124
ENSG00000152977	ENSG00000110514
ENSG00000072786	ENSG00000241878
ENSG00000152977	ENSG00000165821
ENSG00000084234	ENSG00000139546
ENSG00000139620	ENSG00000135124
ENSG00000198795	ENSG00000147162
ENSG00000152977	ENSG00000089902
ENSG00000117682	ENSG00000181666
ENSG00000103326	ENSG00000198795
ENSG00000003393	ENSG00000100650
ENSG00000152977	ENSG00000074657
ENSG00000158773	ENSG00000152977
ENSG00000215908	ENSG00000184470
ENSG00000173914	ENSG00000135124
ENSG00000080603	ENSG00000156299
ENSG00000003393	ENSG00000139990
ENSG00000011105	ENSG00000198795
ENSG00000009413	ENSG00000053254
ENSG00000136631	ENSG00000135124
ENSG00000139546	ENSG00000103037
ENSG00000089280	ENSG00000125450
ENSG00000006468	ENSG00000189091
ENSG00000004866	ENSG00000135124
ENSG00000006468	ENSG00000160633
ENSG00000171988	ENSG00000053254
ENSG00000152977	ENSG00000204650
ENSG00000075975	ENSG00000006468
ENSG00000152977	ENSG00000130559
ENSG00000162607	ENSG00000139546
ENSG00000135124	ENSG00000141569
ENSG00000126226	ENSG00000198795
ENSG00000112039	ENSG00000156299
ENSG00000198795	ENSG00000068354
ENSG00000070501	ENSG00000196628
ENSG00000198795	ENSG00000213762
ENSG00000198795	ENSG00000124177
ENSG00000135124	ENSG00000205423
ENSG00000182580	ENSG00000070501
ENSG00000198795	ENSG00000126012
ENSG00000113555	ENSG00000070501
ENSG00000113240	ENSG00000100918
ENSG00000148337	ENSG00000198795
ENSG00000163870	ENSG00000070501
ENSG00000148343	ENSG00000135124
ENSG00000221988	ENSG00000070501
ENSG00000152977	ENSG00000215012
ENSG00000115282	ENSG00000070501
ENSG00000070501	ENSG00000126883
ENSG00000152977	ENSG00000111596
ENSG00000003393	ENSG00000112282
ENSG00000065883	ENSG00000070501
ENSG00000070501	ENSG00000158636
ENSG00000113240	ENSG00000131051
ENSG00000152977	ENSG00000103353
ENSG00000070501	ENSG00000103168
ENSG00000239569	ENSG00000022840
ENSG00000198218	ENSG00000152977
ENSG00000135124	ENSG00000094631
ENSG00000076344	ENSG00000125450
ENSG00000070501	ENSG00000158805
ENSG00000003393	ENSG00000139946
ENSG00000112062	ENSG00000198795
ENSG00000160404	ENSG00000135124
ENSG00000152977	ENSG00000109736
ENSG00000003393	ENSG00000155903
ENSG00000087269	ENSG00000138606
ENSG00000003756	ENSG00000152977
ENSG00000040487	ENSG00000135124
ENSG00000152977	ENSG00000158545
ENSG00000152977	ENSG00000105656
ENSG00000111605	ENSG00000135124
ENSG00000152977	ENSG00000128908
ENSG00000003393	ENSG00000198795
ENSG00000198105	ENSG00000198795
ENSG00000135124	ENSG00000108587
ENSG00000113761	ENSG00000135124
ENSG00000184640	ENSG00000156299
ENSG00000003393	ENSG00000010244
ENSG00000006468	ENSG00000008405
ENSG00000152977	ENSG00000173065
ENSG00000160050	ENSG00000072786
ENSG00000003393	ENSG00000100296
ENSG00000152977	ENSG00000156030
ENSG00000006468	ENSG00000174243
ENSG00000132781	ENSG00000070501
ENSG00000198795	ENSG00000167674
ENSG00000152977	ENSG00000159459
ENSG00000162613	ENSG00000135124
ENSG00000070501	ENSG00000140455
ENSG00000240731	ENSG00000152977
ENSG00000139926	ENSG00000156299
ENSG00000135124	ENSG00000181610
ENSG00000152977	ENSG00000124459
ENSG00000003393	ENSG00000050405
ENSG00000135124	ENSG00000011258
ENSG00000053254	ENSG00000159761
ENSG00000152977	ENSG00000070047
ENSG00000137310	ENSG00000099889
ENSG00000239569	ENSG00000102103
ENSG00000139546	ENSG00000135124
ENSG00000157933	ENSG00000135124
ENSG00000152977	ENSG00000075856
ENSG00000196712	ENSG00000156299
ENSG00000198795	ENSG00000085872
ENSG00000152977	ENSG00000157349
ENSG00000120137	ENSG00000139546
ENSG00000152977	ENSG00000179922
ENSG00000152977	ENSG00000100239
ENSG00000070501	ENSG00000089154
ENSG00000084234	ENSG00000135124
ENSG00000239569	ENSG00000132017
ENSG00000122085	ENSG00000006468
ENSG00000152977	ENSG00000141098
ENSG00000152977	ENSG00000139651
ENSG00000126705	ENSG00000198795
ENSG00000135124	ENSG00000005007
ENSG00000142599	ENSG00000070501
ENSG00000178028	ENSG00000135124
ENSG00000143373	ENSG00000006468
ENSG00000126746	ENSG00000156299
ENSG00000152977	ENSG00000132664
ENSG00000162607	ENSG00000135124
ENSG00000135124	ENSG00000103264
ENSG00000170836	ENSG00000099889
ENSG00000198795	ENSG00000104983
ENSG00000152977	ENSG00000127527
ENSG00000117682	ENSG00000186184
ENSG00000152977	ENSG00000002016
ENSG00000168246	ENSG00000110171
ENSG00000152977	ENSG00000092439
ENSG00000006468	ENSG00000167674
ENSG00000116560	ENSG00000135124
ENSG00000152977	ENSG00000083520
ENSG00000152977	ENSG00000099949
ENSG00000152977	ENSG00000083093
ENSG00000198795	ENSG00000213923
ENSG00000163374	ENSG00000135124
ENSG00000003393	ENSG00000175054
ENSG00000198795	ENSG00000130159
ENSG00000156026	ENSG00000198795
ENSG00000152977	ENSG00000153066
ENSG00000141252	ENSG00000198795
ENSG00000196498	ENSG00000198795
ENSG00000152977	ENSG00000008710
ENSG00000152977	ENSG00000158669
ENSG00000070501	ENSG00000168591
ENSG00000221829	ENSG00000135124
ENSG00000113240	ENSG00000213762
ENSG00000140455	ENSG00000180901
ENSG00000006468	ENSG00000103126
ENSG00000003393	ENSG00000007372
ENSG00000198795	ENSG00000184402
ENSG00000058453	ENSG00000152977
ENSG00000072786	ENSG00000006468
ENSG00000152977	ENSG00000157764
ENSG00000152977	ENSG00000111731
ENSG00000158636	ENSG00000198795
ENSG00000114650	ENSG00000135124
ENSG00000097046	ENSG00000152977
ENSG00000149182	ENSG00000156299
ENSG00000158863	ENSG00000156299
ENSG00000070501	ENSG00000103126
ENSG00000152977	ENSG00000070495
ENSG00000070501	ENSG00000104885
ENSG00000152977	ENSG00000159761
ENSG00000156026	ENSG00000185504
ENSG00000072786	ENSG00000023171
ENSG00000151746	ENSG00000198795
ENSG00000072786	ENSG00000070501
ENSG00000112941	ENSG00000156299
ENSG00000156026	ENSG00000095059
ENSG00000113240	ENSG00000263050
ENSG00000006468	ENSG00000140553
ENSG00000135124	ENSG00000137842
ENSG00000152977	ENSG00000170456
ENSG00000152977	ENSG00000151498
ENSG00000198795	ENSG00000099889
ENSG00000185920	ENSG00000156299
ENSG00000152977	ENSG00000145214
ENSG00000198795	ENSG00000172009
ENSG00000154781	ENSG00000135124
ENSG00000003393	ENSG00000070501
ENSG00000198795	ENSG00000126464
ENSG00000159884	ENSG00000156299
ENSG00000003393	ENSG00000157800
ENSG00000162613	ENSG00000139546
ENSG00000003393	ENSG00000166405
ENSG00000003393	ENSG00000163596
ENSG00000003393	ENSG00000006468
ENSG00000152977	ENSG00000127452
ENSG00000123933	ENSG00000139546
ENSG00000241852	ENSG00000135124
ENSG00000117682	ENSG00000101161
ENSG00000006468	ENSG00000197343
ENSG00000176444	ENSG00000070501
ENSG00000113368	ENSG00000139546
ENSG00000117682	ENSG00000149657
ENSG00000008441	ENSG00000156299
ENSG00000003393	ENSG00000205683
ENSG00000152977	ENSG00000270015
ENSG00000152977	ENSG00000145016
ENSG00000070501	ENSG00000080603
ENSG00000113240	ENSG00000100836
ENSG00000095059	ENSG00000099889
ENSG00000177463	ENSG00000152977
ENSG00000198795	ENSG00000174652
ENSG00000152977	ENSG00000125912
ENSG00000008277	ENSG00000139546
ENSG00000152977	ENSG00000128563
ENSG00000198795	ENSG00000105732
ENSG00000139546	ENSG00000125450
ENSG00000152977	ENSG00000138764
ENSG00000171720	ENSG00000198795
ENSG00000124789	ENSG00000135124
ENSG00000135124	ENSG00000100426
ENSG00000206560	ENSG00000152977
ENSG00000198795	ENSG00000142453
ENSG00000135124	ENSG00000099991
ENSG00000003393	ENSG00000111300
ENSG00000152977	ENSG00000183696
ENSG00000003393	ENSG00000137338
ENSG00000003393	ENSG00000135249
ENSG00000152977	ENSG00000084112
ENSG00000197912	ENSG00000156299
ENSG00000152977	ENSG00000155561
ENSG00000135124	ENSG00000140941
ENSG00000088543	ENSG00000135124
ENSG00000117682	ENSG00000198795
ENSG00000003393	ENSG00000137310
ENSG00000152977	ENSG00000175470
ENSG00000178971	ENSG00000156299
ENSG00000152977	ENSG00000001497
ENSG00000006468	ENSG00000124160
ENSG00000076201	ENSG00000198795
ENSG00000146587	ENSG00000006468
ENSG00000152977	ENSG00000119227
ENSG00000139651	ENSG00000156299
ENSG00000198795	ENSG00000130204
ENSG00000135124	ENSG00000072501
ENSG00000114650	ENSG00000152977
ENSG00000155561	ENSG00000135124
ENSG00000113240	ENSG00000033030
ENSG00000153561	ENSG00000099889
ENSG00000198795	ENSG00000088038
ENSG00000003393	ENSG00000119402
ENSG00000070501	ENSG00000140948
ENSG00000152977	ENSG00000065717
ENSG00000070501	ENSG00000156858
ENSG00000006468	ENSG00000130713
ENSG00000198795	ENSG00000083838
ENSG00000152977	ENSG00000164151
ENSG00000154122	ENSG00000099889
ENSG00000070501	ENSG00000125450
ENSG00000175573	ENSG00000198795
ENSG00000198795	ENSG00000159885
ENSG00000135124	ENSG00000126226
ENSG00000070501	ENSG00000103326
ENSG00000160050	ENSG00000152977
ENSG00000152977	ENSG00000185344
ENSG00000239569	ENSG00000132612
ENSG00000239569	ENSG00000160633
ENSG00000152977	ENSG00000148337
ENSG00000171988	ENSG00000180901
ENSG00000113240	ENSG00000236287
ENSG00000177666	ENSG00000135124
ENSG00000157933	ENSG00000152977
ENSG00000152977	ENSG00000068971
ENSG00000152977	ENSG00000133961
ENSG00000122678	ENSG00000070501
ENSG00000049618	ENSG00000006468
ENSG00000137310	ENSG00000139546
ENSG00000135124	ENSG00000147140
ENSG00000152977	ENSG00000136158
ENSG00000152977	ENSG00000185386
ENSG00000117682	ENSG00000100888
ENSG00000152977	ENSG00000147789
ENSG00000152977	ENSG00000124574
ENSG00000006468	ENSG00000110171
ENSG00000006468	ENSG00000128607
ENSG00000152977	ENSG00000118058
ENSG00000185049	ENSG00000070501
ENSG00000204084	ENSG00000070501
ENSG00000178028	ENSG00000152977
ENSG00000162419	ENSG00000135124
ENSG00000006468	ENSG00000185803
ENSG00000198795	ENSG00000181035
ENSG00000152977	ENSG00000171763
ENSG00000070501	ENSG00000167460
ENSG00000010295	ENSG00000156299
ENSG00000160051	ENSG00000152977
ENSG00000152977	ENSG00000107742
ENSG00000204256	ENSG00000139546
ENSG00000152977	ENSG00000092201
ENSG00000152977	ENSG00000102606
ENSG00000168246	ENSG00000113240
ENSG00000006468	ENSG00000100982
ENSG00000103126	ENSG00000156299
ENSG00000152977	ENSG00000137656
ENSG00000070501	ENSG00000140829
ENSG00000113240	ENSG00000264112
ENSG00000205683	ENSG00000156299
ENSG00000114626	ENSG00000198795
ENSG00000135124	ENSG00000196123
ENSG00000156026	ENSG00000100445
ENSG00000117682	ENSG00000095059
ENSG00000185163	ENSG00000198795
ENSG00000204564	ENSG00000139546
ENSG00000152977	ENSG00000107554
ENSG00000198795	ENSG00000130985
ENSG00000170653	ENSG00000156299
ENSG00000113240	ENSG00000135124
ENSG00000070501	ENSG00000108312
ENSG00000126107	ENSG00000070501
ENSG00000003393	ENSG00000213551
ENSG00000070501	ENSG00000130699
ENSG00000070501	ENSG00000100982
ENSG00000172046	ENSG00000198795
ENSG00000003393	ENSG00000133639
ENSG00000139546	ENSG00000103319
ENSG00000163161	ENSG00000003393
ENSG00000006468	ENSG00000140829
ENSG00000152977	ENSG00000095787
ENSG00000003393	ENSG00000049618
ENSG00000152977	ENSG00000132510
ENSG00000114098	ENSG00000053254
ENSG00000152977	ENSG00000174233
ENSG00000075856	ENSG00000198795
ENSG00000152977	ENSG00000174227
ENSG00000003393	ENSG00000112624
ENSG00000169991	ENSG00000139546
ENSG00000139546	ENSG00000159761
ENSG00000152977	ENSG00000204977
ENSG00000135124	ENSG00000205250
ENSG00000166900	ENSG00000156299
ENSG00000130816	ENSG00000156299
ENSG00000099204	ENSG00000139546
ENSG00000152977	ENSG00000215305
ENSG00000152977	ENSG00000124160
ENSG00000152977	ENSG00000096063
ENSG00000174839	ENSG00000135124
ENSG00000123643	ENSG00000135124
ENSG00000003393	ENSG00000053254
ENSG00000239569	ENSG00000100316
ENSG00000198795	ENSG00000105325
ENSG00000161021	ENSG00000070501
ENSG00000168395	ENSG00000152977
ENSG00000152977	ENSG00000130713
ENSG00000070501	ENSG00000100372
ENSG00000156983	ENSG00000152977
ENSG00000152977	ENSG00000205937
ENSG00000165915	ENSG00000198795
ENSG00000115275	ENSG00000198795
ENSG00000152977	ENSG00000103326
ENSG00000113240	ENSG00000183696
ENSG00000081721	ENSG00000156299
ENSG00000070501	ENSG00000103653
ENSG00000215908	ENSG00000139620
ENSG00000198795	ENSG00000105127
ENSG00000070501	ENSG00000128159
ENSG00000152977	ENSG00000177666
ENSG00000152977	ENSG00000138617
ENSG00000111653	ENSG00000099889
ENSG00000215908	ENSG00000156026
ENSG00000152977	ENSG00000140948
ENSG00000152977	ENSG00000112983
ENSG00000149136	ENSG00000198795
ENSG00000152977	ENSG00000125875
ENSG00000119402	ENSG00000135124
ENSG00000152977	ENSG00000110171
ENSG00000132600	ENSG00000198795
ENSG00000158552	ENSG00000156299
ENSG00000119392	ENSG00000135124
ENSG00000050820	ENSG00000198795
ENSG00000003393	ENSG00000071553
ENSG00000122678	ENSG00000156299
ENSG00000198795	ENSG00000141994
ENSG00000215908	ENSG00000175198
ENSG00000152977	ENSG00000124571
ENSG00000070501	ENSG00000130703
ENSG00000006468	ENSG00000148337
ENSG00000152977	ENSG00000112941
ENSG00000107819	ENSG00000156299
ENSG00000272505	ENSG00000198795
ENSG00000152977	ENSG00000113108
ENSG00000152977	ENSG00000178971
ENSG00000070501	ENSG00000104897
ENSG00000003393	ENSG00000112584
ENSG00000152977	ENSG00000130935
ENSG00000204084	ENSG00000156299
ENSG00000125388	ENSG00000135124
ENSG00000158669	ENSG00000156299
ENSG00000072786	ENSG00000103264
ENSG00000152977	ENSG00000130921
ENSG00000139546	ENSG00000198276
ENSG00000198795	ENSG00000101181
ENSG00000139546	ENSG00000149639
ENSG00000135945	ENSG00000152977
ENSG00000070501	ENSG00000156860
ENSG00000135124	ENSG00000059145
ENSG00000145191	ENSG00000156299
ENSG00000070501	ENSG00000136158
ENSG00000168397	ENSG00000135124
ENSG00000117682	ENSG00000058600
ENSG00000230124	ENSG00000152977
ENSG00000078808	ENSG00000006468
ENSG00000092201	ENSG00000159761
ENSG00000162521	ENSG00000135124
ENSG00000112855	ENSG00000135124
ENSG00000152977	ENSG00000100014
ENSG00000006468	ENSG00000137656
ENSG00000113240	ENSG00000136158
ENSG00000152977	ENSG00000100982
ENSG00000239569	ENSG00000120616
ENSG00000198795	ENSG00000099910
ENSG00000152977	ENSG00000106459
ENSG00000185803	ENSG00000156299
ENSG00000113108	ENSG00000198795
ENSG00000003393	ENSG00000100023
ENSG00000152977	ENSG00000089195
ENSG00000006468	ENSG00000092201
ENSG00000257923	ENSG00000156299
ENSG00000003393	ENSG00000108443
ENSG00000009413	ENSG00000198795
ENSG00000168538	ENSG00000135124
ENSG00000162341	ENSG00000198795
ENSG00000117682	ENSG00000197111
ENSG00000152977	ENSG00000236287
ENSG00000113300	ENSG00000006468
ENSG00000138050	ENSG00000006468
ENSG00000120913	ENSG00000156299
ENSG00000126107	ENSG00000156299
ENSG00000070501	ENSG00000165689
ENSG00000171988	ENSG00000198795
ENSG00000003393	ENSG00000197808
ENSG00000156026	ENSG00000065970
ENSG00000152977	ENSG00000137337
ENSG00000070501	ENSG00000165138
ENSG00000152977	ENSG00000259456
ENSG00000135775	ENSG00000198795
ENSG00000171729	ENSG00000070501
ENSG00000163125	ENSG00000135124
ENSG00000070501	ENSG00000139651
ENSG00000070501	ENSG00000182979
ENSG00000070047	ENSG00000198795
ENSG00000070501	ENSG00000099381
ENSG00000152977	ENSG00000047188
ENSG00000003393	ENSG00000152217
ENSG00000070610	ENSG00000156299
ENSG00000077684	ENSG00000113240
ENSG00000152977	ENSG00000113240
ENSG00000205060	ENSG00000156299
ENSG00000110047	ENSG00000135124
ENSG00000119760	ENSG00000003393
ENSG00000135124	ENSG00000125107
ENSG00000166261	ENSG00000198795
ENSG00000152977	ENSG00000062485
ENSG00000070501	ENSG00000070047
ENSG00000152977	ENSG00000165671
ENSG00000168397	ENSG00000152977
ENSG00000152977	ENSG00000176619
ENSG00000006468	ENSG00000148719
ENSG00000070501	ENSG00000104936
ENSG00000111596	ENSG00000135124
ENSG00000161013	ENSG00000135124
ENSG00000107819	ENSG00000053254
ENSG00000073111	ENSG00000152977
ENSG00000197111	ENSG00000128191
ENSG00000180901	ENSG00000125450
ENSG00000070501	ENSG00000054654
ENSG00000161036	ENSG00000198795
ENSG00000152977	ENSG00000089154
ENSG00000006468	ENSG00000139651
ENSG00000070501	ENSG00000198276
ENSG00000070501	ENSG00000149639
ENSG00000043514	ENSG00000152977
ENSG00000152977	ENSG00000125447
ENSG00000130713	ENSG00000135124
ENSG00000003393	ENSG00000257923
ENSG00000168566	ENSG00000139546
ENSG00000075975	ENSG00000043355
ENSG00000070501	ENSG00000099949
ENSG00000003393	ENSG00000006530
ENSG00000003393	ENSG00000099204
ENSG00000080603	ENSG00000198795
ENSG00000152977	ENSG00000125484
ENSG00000086102	ENSG00000135124
ENSG00000171862	ENSG00000135124
ENSG00000008869	ENSG00000003393
ENSG00000003393	ENSG00000125458
ENSG00000152977	ENSG00000103319
ENSG00000070501	ENSG00000105221
ENSG00000003393	ENSG00000170471
ENSG00000135124	ENSG00000205643
ENSG00000109685	ENSG00000135124
ENSG00000102984	ENSG00000198795
ENSG00000152977	ENSG00000161013
ENSG00000163125	ENSG00000152977
ENSG00000152977	ENSG00000145833
ENSG00000114098	ENSG00000006468
ENSG00000152977	ENSG00000164631
ENSG00000070501	ENSG00000180773
ENSG00000064703	ENSG00000198795
ENSG00000003393	ENSG00000174373
ENSG00000152977	ENSG00000186111
ENSG00000131584	ENSG00000198795
ENSG00000102977	ENSG00000198795
ENSG00000120616	ENSG00000135124
ENSG00000003393	ENSG00000166986
ENSG00000003393	ENSG00000136169
ENSG00000148337	ENSG00000156299
ENSG00000078808	ENSG00000239569
ENSG00000003393	ENSG00000165525
ENSG00000185219	ENSG00000070501
ENSG00000152977	ENSG00000103126
ENSG00000135124	ENSG00000141279
ENSG00000006468	ENSG00000158669
ENSG00000003393	ENSG00000136828
ENSG00000003393	ENSG00000164808
ENSG00000070501	ENSG00000139718
ENSG00000003393	ENSG00000184056
ENSG00000152977	ENSG00000158863
ENSG00000156026	ENSG00000101365
ENSG00000117682	ENSG00000144028
ENSG00000152977	ENSG00000140553
ENSG00000162775	ENSG00000152977
ENSG00000152977	ENSG00000183530
ENSG00000152977	ENSG00000102984
ENSG00000158863	ENSG00000070501
ENSG00000152977	ENSG00000044090
ENSG00000168763	ENSG00000139546
ENSG00000198795	ENSG00000102312
ENSG00000152977	ENSG00000161204
ENSG00000135124	ENSG00000088247
ENSG00000072786	ENSG00000156299
ENSG00000152977	ENSG00000142556
ENSG00000152977	ENSG00000113719
ENSG00000156983	ENSG00000135124
ENSG00000003393	ENSG00000156299
ENSG00000135124	ENSG00000076984
ENSG00000213676	ENSG00000135124
ENSG00000152977	ENSG00000074755
ENSG00000198795	ENSG00000196361
ENSG00000070501	ENSG00000105397
ENSG00000168395	ENSG00000135124
ENSG00000264538	ENSG00000156299
ENSG00000164048	ENSG00000152977
ENSG00000003393	ENSG00000011105
ENSG00000152977	ENSG00000100201
ENSG00000164151	ENSG00000198795
ENSG00000162923	ENSG00000003393
ENSG00000152977	ENSG00000147162
ENSG00000239569	ENSG00000139620
ENSG00000198795	ENSG00000065000
ENSG00000117682	ENSG00000137171
ENSG00000003393	ENSG00000184863
ENSG00000152977	ENSG00000174231
ENSG00000198795	ENSG00000261221
ENSG00000135124	ENSG00000105229
ENSG00000152977	ENSG00000012822
ENSG00000160094	ENSG00000070501
ENSG00000139546	ENSG00000065717
ENSG00000152977	ENSG00000131023
ENSG00000163050	ENSG00000006468
ENSG00000068745	ENSG00000139546
ENSG00000047188	ENSG00000135124
ENSG00000185359	ENSG00000156299
ENSG00000071243	ENSG00000135124
ENSG00000135124	ENSG00000187555
ENSG00000204227	ENSG00000135124
ENSG00000135124	ENSG00000125686
ENSG00000185219	ENSG00000135124
ENSG00000204822	ENSG00000152977
ENSG00000003393	ENSG00000205476
ENSG00000143515	ENSG00000198795
ENSG00000135124	ENSG00000125651
ENSG00000152977	ENSG00000157426
ENSG00000152977	ENSG00000165494
ENSG00000168876	ENSG00000135124
ENSG00000070501	ENSG00000124181
ENSG00000152977	ENSG00000049618
ENSG00000198795	ENSG00000161914
ENSG00000152977	ENSG00000130640
ENSG00000160097	ENSG00000152977
ENSG00000152977	ENSG00000171634
ENSG00000006468	ENSG00000213024
ENSG00000152977	ENSG00000185986
ENSG00000110076	ENSG00000135124
ENSG00000011105	ENSG00000065717
ENSG00000162572	ENSG00000070501
ENSG00000114650	ENSG00000156299
ENSG00000152977	ENSG00000103275
ENSG00000149182	ENSG00000135124
ENSG00000072786	ENSG00000008277
ENSG00000135124	ENSG00000184470
ENSG00000152977	ENSG00000130734
ENSG00000145041	ENSG00000135124
ENSG00000003393	ENSG00000115568
ENSG00000159840	ENSG00000156299
ENSG00000159692	ENSG00000135124
ENSG00000003393	ENSG00000182628
ENSG00000197136	ENSG00000198795
ENSG00000152977	ENSG00000055609
ENSG00000003393	ENSG00000130703
ENSG00000152977	ENSG00000185158
ENSG00000156983	ENSG00000070501
ENSG00000172432	ENSG00000198795
ENSG00000139546	ENSG00000157353
ENSG00000139546	ENSG00000147140
ENSG00000140948	ENSG00000198795
ENSG00000203667	ENSG00000113240
ENSG00000023171	ENSG00000198795
ENSG00000152977	ENSG00000100393
ENSG00000003393	ENSG00000152409
ENSG00000152977	ENSG00000125107
ENSG00000003393	ENSG00000198466
ENSG00000003393	ENSG00000135486
ENSG00000187555	ENSG00000198795
ENSG00000070501	ENSG00000139926
ENSG00000152977	ENSG00000114331
ENSG00000003393	ENSG00000166747
ENSG00000163788	ENSG00000006468
ENSG00000003393	ENSG00000136158
ENSG00000146676	ENSG00000198795
ENSG00000087269	ENSG00000198795
ENSG00000157933	ENSG00000156299
ENSG00000152977	ENSG00000009413
ENSG00000155760	ENSG00000070501
ENSG00000003393	ENSG00000212719
ENSG00000070501	ENSG00000053254
ENSG00000152977	ENSG00000105229
ENSG00000205937	ENSG00000198795
ENSG00000152977	ENSG00000161036
ENSG00000139546	ENSG00000156299
ENSG00000152977	ENSG00000155393
ENSG00000043355	ENSG00000156299
ENSG00000070501	ENSG00000171988
ENSG00000152977	ENSG00000179889
ENSG00000196123	ENSG00000198795
ENSG00000152977	ENSG00000215041
ENSG00000152977	ENSG00000176953
ENSG00000176953	ENSG00000198795
ENSG00000133624	ENSG00000101161
ENSG00000115216	ENSG00000198795
ENSG00000006468	ENSG00000171988
ENSG00000196911	ENSG00000139546
ENSG00000152977	ENSG00000113649
ENSG00000135945	ENSG00000006468
ENSG00000152977	ENSG00000082805
ENSG00000003393	ENSG00000091127
ENSG00000003393	ENSG00000145362
ENSG00000152977	ENSG00000102977
ENSG00000152977	ENSG00000076984
ENSG00000167965	ENSG00000198795
ENSG00000161013	ENSG00000070501
ENSG00000135124	ENSG00000080603
ENSG00000117682	ENSG00000100316
ENSG00000074054	ENSG00000152977
ENSG00000117682	ENSG00000112855
ENSG00000152977	ENSG00000088247
ENSG00000185504	ENSG00000156299
ENSG00000164684	ENSG00000135124
ENSG00000139697	ENSG00000156299
ENSG00000239569	ENSG00000149136
ENSG00000135124	ENSG00000168591
ENSG00000116062	ENSG00000152977
ENSG00000130714	ENSG00000156299
ENSG00000139546	ENSG00000136141
ENSG00000165689	ENSG00000135124
ENSG00000239569	ENSG00000111361
ENSG00000115486	ENSG00000152977
ENSG00000124574	ENSG00000198795
ENSG00000165494	ENSG00000135124
ENSG00000239569	ENSG00000063244
ENSG00000152977	ENSG00000141279
ENSG00000170265	ENSG00000198795
ENSG00000072786	ENSG00000138606
ENSG00000135124	ENSG00000103126
ENSG00000162688	ENSG00000152977
ENSG00000152977	ENSG00000137310
ENSG00000117682	ENSG00000128908
ENSG00000115942	ENSG00000135124
ENSG00000152977	ENSG00000135249
ENSG00000152977	ENSG00000137338
ENSG00000174231	ENSG00000198795
ENSG00000132153	ENSG00000198795
ENSG00000135124	ENSG00000188895
ENSG00000070501	ENSG00000156299
ENSG00000140553	ENSG00000156299
ENSG00000135124	ENSG00000125875
ENSG00000003393	ENSG00000270015
ENSG00000134744	ENSG00000070501
ENSG00000003393	ENSG00000113522
ENSG00000003393	ENSG00000105426
ENSG00000198795	ENSG00000105705
ENSG00000003393	ENSG00000126214
ENSG00000117682	ENSG00000139620
ENSG00000006468	ENSG00000126226
ENSG00000135124	ENSG00000138617
ENSG00000139546	ENSG00000053254
ENSG00000099381	ENSG00000198795
ENSG00000003393	ENSG00000119231
ENSG00000135124	ENSG00000205937
ENSG00000239569	ENSG00000101158
ENSG00000197111	ENSG00000135124
ENSG00000152977	ENSG00000023171
ENSG00000148843	ENSG00000135124
ENSG00000215908	ENSG00000180901
ENSG00000117682	ENSG00000168137
ENSG00000135124	ENSG00000125450
ENSG00000152977	ENSG00000103510
ENSG00000003393	ENSG00000129292
ENSG00000152977	ENSG00000130723
ENSG00000003393	ENSG00000145348
ENSG00000078808	ENSG00000135124
ENSG00000152977	ENSG00000172262
ENSG00000003393	ENSG00000108506
ENSG00000037637	ENSG00000198795
ENSG00000003393	ENSG00000111731
ENSG00000003393	ENSG00000157764
ENSG00000152977	ENSG00000107819
ENSG00000155975	ENSG00000070501
ENSG00000006468	ENSG00000042429
ENSG00000070501	ENSG00000099991
ENSG00000152977	ENSG00000146676
ENSG00000196123	ENSG00000101161
ENSG00000135124	ENSG00000124160
ENSG00000171988	ENSG00000139546
ENSG00000198795	ENSG00000131067
ENSG00000070501	ENSG00000100815
ENSG00000161904	ENSG00000135124
ENSG00000168246	ENSG00000171988
ENSG00000115942	ENSG00000152977
ENSG00000120832	ENSG00000135124
ENSG00000135124	ENSG00000204977
ENSG00000113300	ENSG00000135124
ENSG00000186184	ENSG00000125450
ENSG00000138050	ENSG00000135124
ENSG00000198795	ENSG00000101365
ENSG00000113240	ENSG00000011105
ENSG00000011105	ENSG00000149639
ENSG00000114098	ENSG00000152977
ENSG00000163161	ENSG00000198795
ENSG00000175029	ENSG00000156299
ENSG00000006468	ENSG00000136141
ENSG00000103549	ENSG00000156299
ENSG00000070501	ENSG00000140564
ENSG00000115486	ENSG00000135124
ENSG00000113240	ENSG00000156299
ENSG00000070501	ENSG00000165915
ENSG00000070501	ENSG00000099204
ENSG00000139546	ENSG00000103264
ENSG00000152977	ENSG00000140992
ENSG00000152977	ENSG00000099995
ENSG00000003393	ENSG00000134759
ENSG00000088543	ENSG00000156299
ENSG00000003393	ENSG00000070669
ENSG00000185219	ENSG00000152977
ENSG00000095539	ENSG00000198795
ENSG00000006468	ENSG00000088876
ENSG00000116128	ENSG00000198795
ENSG00000040933	ENSG00000152977
ENSG00000152977	ENSG00000177125
ENSG00000152977	ENSG00000099956
ENSG00000003393	ENSG00000100359
ENSG00000144589	ENSG00000152977
ENSG00000135124	ENSG00000104064
ENSG00000135124	ENSG00000123154
ENSG00000116213	ENSG00000198795
ENSG00000156026	ENSG00000105497
ENSG00000152977	ENSG00000004478
ENSG00000185485	ENSG00000070501
ENSG00000152977	ENSG00000119401
ENSG00000070501	ENSG00000140983
ENSG00000198795	ENSG00000101199
ENSG00000152977	ENSG00000109606
ENSG00000152977	ENSG00000170448
ENSG00000187522	ENSG00000135124
ENSG00000139625	ENSG00000198795
ENSG00000003393	ENSG00000114648
ENSG00000135124	ENSG00000100982
ENSG00000067365	ENSG00000156299
ENSG00000072786	ENSG00000141098
ENSG00000123643	ENSG00000006468
ENSG00000006468	ENSG00000196123
ENSG00000092201	ENSG00000053254
ENSG00000152977	ENSG00000101474
ENSG00000152977	ENSG00000059145
ENSG00000152977	ENSG00000050820
ENSG00000003393	ENSG00000155760
ENSG00000167967	ENSG00000198795
ENSG00000152977	ENSG00000126746
ENSG00000003393	ENSG00000153339
ENSG00000106346	ENSG00000198795
ENSG00000145041	ENSG00000152977
ENSG00000152977	ENSG00000128596
ENSG00000171467	ENSG00000198795
ENSG00000152977	ENSG00000175691
ENSG00000112763	ENSG00000156299
ENSG00000198795	ENSG00000079432
ENSG00000070501	ENSG00000198720
ENSG00000070501	ENSG00000008441
ENSG00000070501	ENSG00000111676
ENSG00000009335	ENSG00000135124
ENSG00000065970	ENSG00000156299
ENSG00000152977	ENSG00000182580
ENSG00000003393	ENSG00000147162
ENSG00000152977	ENSG00000184863
ENSG00000109606	ENSG00000139546
ENSG00000132740	ENSG00000198795
ENSG00000157933	ENSG00000167862
ENSG00000131368	ENSG00000152977
ENSG00000049618	ENSG00000135124
ENSG00000053254	ENSG00000196123
ENSG00000198795	ENSG00000241878
ENSG00000152977	ENSG00000126226
ENSG00000003393	ENSG00000196263
ENSG00000152977	ENSG00000149187
ENSG00000152977	ENSG00000162302
ENSG00000152977	ENSG00000155545
ENSG00000164896	ENSG00000135124
ENSG00000152977	ENSG00000147155
ENSG00000107281	ENSG00000198795
ENSG00000116754	ENSG00000152977
ENSG00000173653	ENSG00000135124
ENSG00000152977	ENSG00000150401
ENSG00000158552	ENSG00000135124
ENSG00000152977	ENSG00000135299
ENSG00000168397	ENSG00000156299
ENSG00000144028	ENSG00000070501
ENSG00000135124	ENSG00000174197
ENSG00000070501	ENSG00000100227
ENSG00000072786	ENSG00000102984
ENSG00000070501	ENSG00000120685
ENSG00000152977	ENSG00000011105
ENSG00000006468	ENSG00000070501
ENSG00000168591	ENSG00000198795
ENSG00000152977	ENSG00000109762
ENSG00000198795	ENSG00000170604
ENSG00000198795	ENSG00000167378
ENSG00000003393	ENSG00000183530
ENSG00000183696	ENSG00000156299
ENSG00000125450	ENSG00000156299
ENSG00000188976	ENSG00000135124
ENSG00000239569	ENSG00000100445
ENSG00000154429	ENSG00000152977
ENSG00000198795	ENSG00000095059
ENSG00000006468	ENSG00000146676
ENSG00000152977	ENSG00000118900
ENSG00000081791	ENSG00000137802
ENSG00000158773	ENSG00000198795
ENSG00000152977	ENSG00000198133
ENSG00000162302	ENSG00000135124
ENSG00000003393	ENSG00000167107
ENSG00000006468	ENSG00000107819
ENSG00000152977	ENSG00000042429
ENSG00000135124	ENSG00000213995
ENSG00000003393	ENSG00000135655
ENSG00000006468	ENSG00000105968
ENSG00000215908	ENSG00000198795
ENSG00000167258	ENSG00000198795
ENSG00000198795	ENSG00000101189
ENSG00000058600	ENSG00000156299
ENSG00000113240	ENSG00000006468
ENSG00000204564	ENSG00000198795
ENSG00000116698	ENSG00000152977
ENSG00000158158	ENSG00000152977
ENSG00000154822	ENSG00000152977
ENSG00000074964	ENSG00000123136
ENSG00000103319	ENSG00000198795
ENSG00000070501	ENSG00000176986
ENSG00000152977	ENSG00000139266
ENSG00000152977	ENSG00000064607
ENSG00000152977	ENSG00000077684
ENSG00000076641	ENSG00000139546
ENSG00000139546	ENSG00000088247
ENSG00000152977	ENSG00000099991
ENSG00000152977	ENSG00000106733
ENSG00000113240	ENSG00000070501
ENSG00000152977	ENSG00000179859
ENSG00000044090	ENSG00000198795
ENSG00000120254	ENSG00000156299
ENSG00000053254	ENSG00000156299
ENSG00000182685	ENSG00000099956
ENSG00000006468	ENSG00000099956
ENSG00000172273	ENSG00000198795
ENSG00000163050	ENSG00000053254
ENSG00000152977	ENSG00000063169
ENSG00000152977	ENSG00000088876
ENSG00000198795	ENSG00000130816
ENSG00000167395	ENSG00000198795
ENSG00000003393	ENSG00000213398
ENSG00000003393	ENSG00000196458
ENSG00000198795	ENSG00000101361
ENSG00000070501	ENSG00000073169
ENSG00000198795	ENSG00000100296
ENSG00000152977	ENSG00000136381
ENSG00000152977	ENSG00000196123
ENSG00000185485	ENSG00000156299
ENSG00000070501	ENSG00000099995
ENSG00000196361	ENSG00000156299
ENSG00000152977	ENSG00000165915
ENSG00000123643	ENSG00000156299
ENSG00000198795	ENSG00000025770
ENSG00000158864	ENSG00000152977
ENSG00000152977	ENSG00000257923
ENSG00000152977	ENSG00000185163
ENSG00000198218	ENSG00000198795
ENSG00000152977	ENSG00000170471
ENSG00000135124	ENSG00000092201
ENSG00000152977	ENSG00000215251
ENSG00000070501	ENSG00000099956
ENSG00000137310	ENSG00000241878
ENSG00000146587	ENSG00000135124
ENSG00000003393	ENSG00000198105
ENSG00000003393	ENSG00000198677
ENSG00000081721	ENSG00000135124
ENSG00000070501	ENSG00000158717
ENSG00000152977	ENSG00000156515
ENSG00000135775	ENSG00000156026
ENSG00000168137	ENSG00000070501
ENSG00000135124	ENSG00000171763
ENSG00000138764	ENSG00000135124
ENSG00000117682	ENSG00000081791
ENSG00000152977	ENSG00000111676
ENSG00000003393	ENSG00000152977
ENSG00000070501	ENSG00000104915
ENSG00000152977	ENSG00000146909
ENSG00000198795	ENSG00000130584
ENSG00000152977	ENSG00000122257
ENSG00000136848	ENSG00000135124
ENSG00000003393	ENSG00000139697
ENSG00000003393	ENSG00000129484
ENSG00000075407	ENSG00000135124
ENSG00000006468	ENSG00000101474
ENSG00000110171	ENSG00000198795
ENSG00000152977	ENSG00000135298
ENSG00000070501	ENSG00000092208
ENSG00000003393	ENSG00000047188
ENSG00000107745	ENSG00000198795
ENSG00000239569	ENSG00000100083
ENSG00000152977	ENSG00000147140
ENSG00000159761	ENSG00000180901
ENSG00000152977	ENSG00000164941
ENSG00000158941	ENSG00000135124
ENSG00000003393	ENSG00000062485
ENSG00000117682	ENSG00000102103
ENSG00000152977	ENSG00000070061
ENSG00000070501	ENSG00000050820
ENSG00000112763	ENSG00000006468
ENSG00000239569	ENSG00000103549
ENSG00000070501	ENSG00000126746
ENSG00000070501	ENSG00000141905
ENSG00000239569	ENSG00000100726
ENSG00000135124	ENSG00000104897
ENSG00000006468	ENSG00000165494
ENSG00000174151	ENSG00000070501
ENSG00000008710	ENSG00000198795
ENSG00000152977	ENSG00000078403
ENSG00000004487	ENSG00000241878
ENSG00000148343	ENSG00000198795
ENSG00000143434	ENSG00000198795
ENSG00000137171	ENSG00000156026
ENSG00000139546	ENSG00000073169
ENSG00000133895	ENSG00000198795
ENSG00000082258	ENSG00000152977
ENSG00000135124	ENSG00000134759
ENSG00000152977	ENSG00000179912
ENSG00000070501	ENSG00000103249
ENSG00000215908	ENSG00000186184
ENSG00000118689	ENSG00000139546
ENSG00000204178	ENSG00000239569
ENSG00000072786	ENSG00000135124
ENSG00000160404	ENSG00000198795
ENSG00000112062	ENSG00000135124
ENSG00000113240	ENSG00000125846
ENSG00000125633	ENSG00000152977
ENSG00000239569	ENSG00000185504
ENSG00000152977	ENSG00000111674
ENSG00000158864	ENSG00000135124
ENSG00000135124	ENSG00000127527
ENSG00000152977	ENSG00000103264
ENSG00000003393	ENSG00000185963
ENSG00000198795	ENSG00000105298
ENSG00000135124	ENSG00000132664
ENSG00000070501	ENSG00000165494
ENSG00000117682	ENSG00000130414
ENSG00000186184	ENSG00000149639
ENSG00000152977	ENSG00000168566
ENSG00000070501	ENSG00000100393
ENSG00000152977	ENSG00000178761
ENSG00000198795	ENSG00000149657
ENSG00000003393	ENSG00000178971
ENSG00000070501	ENSG00000125107
ENSG00000008277	ENSG00000198795
ENSG00000003393	ENSG00000135124
ENSG00000180901	ENSG00000156299
ENSG00000198795	ENSG00000104964
ENSG00000006468	ENSG00000130734
ENSG00000081721	ENSG00000152977
ENSG00000135124	ENSG00000088298
ENSG00000161204	ENSG00000198795
ENSG00000152977	ENSG00000004866
ENSG00000070501	ENSG00000141867
ENSG00000152977	ENSG00000214367
ENSG00000198795	ENSG00000198026
ENSG00000103275	ENSG00000198795
ENSG00000070501	ENSG00000130734
ENSG00000077782	ENSG00000139546
ENSG00000052723	ENSG00000006468
ENSG00000239569	ENSG00000088356
ENSG00000070501	ENSG00000100813
ENSG00000081721	ENSG00000113240
ENSG00000152977	ENSG00000140995
ENSG00000152977	ENSG00000008735
ENSG00000198795	ENSG00000218891
ENSG00000003393	ENSG00000167460
ENSG00000136141	ENSG00000156299
ENSG00000003393	ENSG00000112941
ENSG00000152977	ENSG00000087206
ENSG00000198795	ENSG00000132024
ENSG00000152977	ENSG00000100426
ENSG00000070501	ENSG00000198646
ENSG00000112787	ENSG00000198795
ENSG00000196150	ENSG00000135124
ENSG00000158552	ENSG00000152977
ENSG00000152977	ENSG00000102225
ENSG00000004487	ENSG00000198795
ENSG00000070501	ENSG00000128191
ENSG00000139546	ENSG00000103510
ENSG00000003393	ENSG00000134987
ENSG00000152977	ENSG00000157224
ENSG00000239569	ENSG00000182685
ENSG00000152977	ENSG00000136816
ENSG00000215908	ENSG00000008838
ENSG00000157933	ENSG00000070501
ENSG00000003393	ENSG00000085382
ENSG00000116754	ENSG00000135124
ENSG00000135124	ENSG00000125912
ENSG00000131368	ENSG00000135124
ENSG00000070501	ENSG00000076984
ENSG00000152977	ENSG00000137275
ENSG00000188827	ENSG00000198795
ENSG00000117682	ENSG00000153561
ENSG00000152977	ENSG00000140943
ENSG00000053254	ENSG00000103264
ENSG00000135124	ENSG00000101126
ENSG00000152977	ENSG00000145191
ENSG00000198795	ENSG00000100281
ENSG00000003393	ENSG00000198853
ENSG00000130939	ENSG00000003393
ENSG00000204084	ENSG00000152977
ENSG00000070501	ENSG00000105229
ENSG00000167962	ENSG00000198795
ENSG00000006468	ENSG00000176953
ENSG00000152977	ENSG00000173621
ENSG00000011105	ENSG00000100982
ENSG00000152977	ENSG00000171988
ENSG00000121067	ENSG00000099889
ENSG00000075975	ENSG00000139546
ENSG00000006468	ENSG00000100796
ENSG00000156026	ENSG00000139546
ENSG00000011105	ENSG00000135124
ENSG00000152977	ENSG00000088256
ENSG00000003393	ENSG00000096063
ENSG00000135124	ENSG00000159761
ENSG00000152977	ENSG00000169057
ENSG00000003393	ENSG00000168395
ENSG00000116560	ENSG00000006468
ENSG00000197724	ENSG00000198795
ENSG00000197062	ENSG00000135124
ENSG00000168246	ENSG00000006468
ENSG00000152977	ENSG00000267565
ENSG00000003393	ENSG00000033178
ENSG00000152977	ENSG00000019995
ENSG00000126107	ENSG00000152977
ENSG00000152977	ENSG00000157350
ENSG00000198133	ENSG00000156299
ENSG00000073910	ENSG00000156299
ENSG00000158158	ENSG00000135124
ENSG00000132773	ENSG00000139546
ENSG00000003393	ENSG00000152223
ENSG00000152977	ENSG00000131016
ENSG00000198795	ENSG00000101216
ENSG00000152977	ENSG00000242732
ENSG00000135124	ENSG00000092148
ENSG00000116698	ENSG00000135124
ENSG00000215908	ENSG00000239569
ENSG00000174151	ENSG00000198795
ENSG00000157933	ENSG00000088356
ENSG00000072786	ENSG00000139546
ENSG00000185359	ENSG00000198795
ENSG00000117682	ENSG00000107745
ENSG00000198795	ENSG00000118046
ENSG00000198795	ENSG00000047230
ENSG00000070501	ENSG00000100083
ENSG00000139546	ENSG00000241878
ENSG00000135124	ENSG00000136100
ENSG00000006468	ENSG00000074266
ENSG00000163870	ENSG00000135124
ENSG00000152977	ENSG00000147118
ENSG00000156026	ENSG00000125450
ENSG00000117682	ENSG00000165671
ENSG00000152977	ENSG00000151746
ENSG00000117682	ENSG00000152977
ENSG00000070501	ENSG00000103549
ENSG00000006468	ENSG00000100726
ENSG00000113719	ENSG00000135124
ENSG00000162706	ENSG00000152977
ENSG00000152977	ENSG00000010295
ENSG00000151746	ENSG00000135124
ENSG00000068971	ENSG00000198795
ENSG00000135124	ENSG00000074657
ENSG00000136271	ENSG00000070501
ENSG00000076201	ENSG00000152977
ENSG00000152977	ENSG00000196741
ENSG00000135124	ENSG00000089094
ENSG00000152977	ENSG00000106346
ENSG00000135124	ENSG00000089916
ENSG00000118689	ENSG00000135124
ENSG00000164080	ENSG00000152977
ENSG00000135124	ENSG00000089902
ENSG00000152977	ENSG00000164306
ENSG00000077782	ENSG00000135124
ENSG00000043355	ENSG00000032219
ENSG00000126217	ENSG00000198795
ENSG00000117682	ENSG00000187555
ENSG00000135124	ENSG00000136504
ENSG00000152977	ENSG00000055118
ENSG00000003393	ENSG00000128891
ENSG00000239569	ENSG00000099956
ENSG00000172432	ENSG00000156299
ENSG00000198795	ENSG00000099821
ENSG00000006468	ENSG00000146834
ENSG00000116350	ENSG00000135124
ENSG00000003393	ENSG00000203879
ENSG00000135124	ENSG00000089335
ENSG00000003393	ENSG00000072786
ENSG00000081721	ENSG00000099889
ENSG00000123933	ENSG00000070501
ENSG00000152977	ENSG00000119689
ENSG00000152977	ENSG00000120008
ENSG00000152977	ENSG00000137574
ENSG00000006468	ENSG00000184787
ENSG00000072786	ENSG00000125966
ENSG00000003393	ENSG00000139546
ENSG00000003393	ENSG00000136891
ENSG00000003393	ENSG00000135341
ENSG00000152977	ENSG00000128482
ENSG00000003393	ENSG00000148396
ENSG00000157933	ENSG00000198795
ENSG00000152977	ENSG00000161914
ENSG00000006468	ENSG00000105298
ENSG00000087269	ENSG00000156299
ENSG00000152977	ENSG00000182325
ENSG00000152977	ENSG00000120784
ENSG00000156026	ENSG00000100982
ENSG00000139546	ENSG00000198795
ENSG00000141098	ENSG00000198795
ENSG00000043355	ENSG00000198795
ENSG00000152977	ENSG00000196387
ENSG00000152977	ENSG00000076924
ENSG00000003393	ENSG00000130985
ENSG00000152977	ENSG00000074855
ENSG00000070501	ENSG00000100445
ENSG00000135124	ENSG00000173065
ENSG00000115216	ENSG00000156299
ENSG00000152977	ENSG00000159079
ENSG00000167792	ENSG00000198795
ENSG00000152977	ENSG00000196152
ENSG00000152977	ENSG00000065970
ENSG00000116754	ENSG00000139546
ENSG00000178028	ENSG00000198795
ENSG00000163104	ENSG00000135124
ENSG00000152977	ENSG00000173653
ENSG00000100505	ENSG00000198795
ENSG00000070501	ENSG00000105298
ENSG00000003393	ENSG00000006576
ENSG00000135124	ENSG00000127554
ENSG00000185504	ENSG00000198795
ENSG00000152977	ENSG00000005100
ENSG00000169914	ENSG00000003393
ENSG00000152977	ENSG00000165804
ENSG00000152977	ENSG00000005882
ENSG00000152977	ENSG00000258297
ENSG00000070501	ENSG00000141551
ENSG00000152977	ENSG00000204271
ENSG00000198795	ENSG00000181666
ENSG00000198795	ENSG00000125846
ENSG00000103502	ENSG00000198795
ENSG00000006468	ENSG00000109065
ENSG00000075975	ENSG00000135124
ENSG00000148943	ENSG00000156299
ENSG00000182667	ENSG00000156299
ENSG00000130713	ENSG00000043355
ENSG00000011105	ENSG00000139546
ENSG00000257923	ENSG00000099889
ENSG00000198795	ENSG00000130734
ENSG00000152977	ENSG00000051009
ENSG00000172046	ENSG00000152977
ENSG00000198795	ENSG00000141867
ENSG00000170265	ENSG00000156299
ENSG00000006468	ENSG00000101161
ENSG00000117682	ENSG00000080603
ENSG00000115942	ENSG00000003393
ENSG00000174231	ENSG00000156299
ENSG00000204650	ENSG00000198795
ENSG00000003393	ENSG00000174282
ENSG00000070501	ENSG00000198795
ENSG00000157916	ENSG00000152977
ENSG00000152977	ENSG00000133895
ENSG00000155545	ENSG00000135124
ENSG00000140553	ENSG00000198795
ENSG00000239569	ENSG00000088247
ENSG00000152977	ENSG00000171456
ENSG00000070501	ENSG00000185920
ENSG00000163939	ENSG00000198795
ENSG00000089154	ENSG00000156299
ENSG00000152977	ENSG00000149136
ENSG00000070501	ENSG00000130816
ENSG00000006468	ENSG00000025770
ENSG00000152977	ENSG00000147133
ENSG00000003393	ENSG00000273033
ENSG00000109606	ENSG00000135124
ENSG00000106144	ENSG00000070501
ENSG00000137310	ENSG00000006468
ENSG00000152977	ENSG00000063244
ENSG00000126705	ENSG00000152977
ENSG00000135124	ENSG00000101546
ENSG00000152977	ENSG00000159899
ENSG00000198795	ENSG00000099956
ENSG00000152977	ENSG00000111605
ENSG00000182685	ENSG00000198795
ENSG00000152977	ENSG00000151553
ENSG00000006468	ENSG00000198795
ENSG00000186141	ENSG00000198795
ENSG00000085511	ENSG00000198795
ENSG00000152977	ENSG00000043143
ENSG00000070501	ENSG00000005339
ENSG00000003393	ENSG00000140521
ENSG00000152977	ENSG00000079432
ENSG00000166405	ENSG00000198795
ENSG00000070501	ENSG00000176248
ENSG00000110066	ENSG00000135124
ENSG00000152977	ENSG00000180901
ENSG00000152977	ENSG00000123066
ENSG00000003393	ENSG00000198176
ENSG00000152977	ENSG00000173137
ENSG00000175265	ENSG00000198795
ENSG00000113649	ENSG00000198795
ENSG00000168071	ENSG00000139546
ENSG00000152977	ENSG00000198169
ENSG00000126107	ENSG00000139546
ENSG00000215908	ENSG00000070501
ENSG00000203667	ENSG00000156026
ENSG00000139546	ENSG00000149657
ENSG00000135124	ENSG00000214078
ENSG00000152977	ENSG00000196150
ENSG00000139546	ENSG00000101161
ENSG00000006468	ENSG00000137770
ENSG00000127415	ENSG00000198795
ENSG00000003393	ENSG00000168246
ENSG00000003393	ENSG00000101019
ENSG00000171729	ENSG00000003393
ENSG00000070501	ENSG00000182685
ENSG00000003393	ENSG00000166900
ENSG00000198795	ENSG00000101474
ENSG00000003393	ENSG00000161048
ENSG00000198795	ENSG00000172465
ENSG00000003393	ENSG00000175029
ENSG00000172046	ENSG00000135124
ENSG00000135124	ENSG00000101181
ENSG00000048028	ENSG00000198795
ENSG00000213551	ENSG00000198795
ENSG00000103549	ENSG00000198795
ENSG00000113240	ENSG00000198795
ENSG00000003393	ENSG00000145868
ENSG00000152977	ENSG00000172943
ENSG00000152977	ENSG00000058600
ENSG00000145833	ENSG00000006468
ENSG00000070501	ENSG00000100888
ENSG00000088543	ENSG00000198795
ENSG00000117682	ENSG00000135124
ENSG00000152977	ENSG00000163872
ENSG00000070501	ENSG00000165792
ENSG00000163870	ENSG00000152977
ENSG00000072786	ENSG00000099889
ENSG00000174233	ENSG00000156299
ENSG00000178498	ENSG00000198795
ENSG00000152977	ENSG00000168066
ENSG00000135124	ENSG00000105325
ENSG00000003393	ENSG00000168904
ENSG00000152977	ENSG00000160360
ENSG00000116213	ENSG00000156299
ENSG00000076201	ENSG00000135124
ENSG00000179456	ENSG00000139546
ENSG00000169991	ENSG00000156299
ENSG00000261799	ENSG00000135124
ENSG00000140474	ENSG00000198795
ENSG00000070501	ENSG00000070610
ENSG00000132155	ENSG00000070501
ENSG00000135124	ENSG00000118162
ENSG00000152977	ENSG00000167625
ENSG00000196405	ENSG00000198795
ENSG00000139625	ENSG00000156299
ENSG00000148229	ENSG00000156299
ENSG00000067365	ENSG00000198795
ENSG00000179456	ENSG00000072786
ENSG00000117682	ENSG00000110171
ENSG00000108312	ENSG00000156299
ENSG00000152977	ENSG00000113761
ENSG00000152977	ENSG00000101365
ENSG00000152977	ENSG00000141027
ENSG00000003393	ENSG00000107938
ENSG00000184271	ENSG00000198795
ENSG00000152977	ENSG00000106344
ENSG00000070501	ENSG00000185504
ENSG00000003393	ENSG00000108389
ENSG00000081721	ENSG00000205978
ENSG00000006468	ENSG00000130803
ENSG00000168781	ENSG00000198795
ENSG00000111203	ENSG00000198795
ENSG00000167967	ENSG00000156299
ENSG00000006468	ENSG00000167967
ENSG00000152977	ENSG00000182087
ENSG00000139546	ENSG00000186184
ENSG00000070501	ENSG00000272849
ENSG00000152977	ENSG00000106608
ENSG00000152977	ENSG00000141219
ENSG00000248487	ENSG00000072786
ENSG00000112763	ENSG00000198795
ENSG00000135124	ENSG00000089280
ENSG00000003393	ENSG00000130414
ENSG00000065970	ENSG00000198795
ENSG00000203667	ENSG00000003393
ENSG00000113240	ENSG00000088356
ENSG00000136848	ENSG00000139546
ENSG00000006468	ENSG00000095059
ENSG00000175470	ENSG00000198795
ENSG00000003393	ENSG00000004766
ENSG00000240731	ENSG00000070501
ENSG00000198198	ENSG00000070501
ENSG00000084112	ENSG00000198795
ENSG00000152977	ENSG00000025770
ENSG00000003393	ENSG00000133858
ENSG00000132740	ENSG00000156299
ENSG00000152977	ENSG00000100296
ENSG00000011105	ENSG00000196361
ENSG00000166986	ENSG00000156299
ENSG00000053254	ENSG00000241878
ENSG00000006468	ENSG00000149136
ENSG00000135124	ENSG00000104177
ENSG00000197111	ENSG00000139546
ENSG00000130414	ENSG00000152977
ENSG00000089094	ENSG00000198795
ENSG00000070501	ENSG00000168488
ENSG00000152977	ENSG00000111364
ENSG00000003393	ENSG00000113593
ENSG00000004534	ENSG00000152977
ENSG00000205250	ENSG00000198795
ENSG00000152977	ENSG00000175806
ENSG00000070501	ENSG00000101199
ENSG00000152977	ENSG00000269918
ENSG00000168397	ENSG00000198795
ENSG00000114098	ENSG00000087269
ENSG00000185158	ENSG00000198795
ENSG00000152977	ENSG00000198795
ENSG00000152977	ENSG00000132740
ENSG00000070501	ENSG00000154832
ENSG00000070501	ENSG00000171456
ENSG00000090097	ENSG00000152977
ENSG00000152977	ENSG00000082068
ENSG00000152977	ENSG00000062822
ENSG00000152977	ENSG00000130816
ENSG00000125388	ENSG00000198795
ENSG00000135124	ENSG00000130749
ENSG00000135124	ENSG00000078043
ENSG00000152977	ENSG00000101361
ENSG00000137310	ENSG00000156299
ENSG00000168591	ENSG00000156299
ENSG00000198795	ENSG00000063169
ENSG00000152977	ENSG00000010244
ENSG00000198795	ENSG00000105401
ENSG00000161904	ENSG00000139546
ENSG00000152977	ENSG00000130779
ENSG00000125450	ENSG00000198795
ENSG00000215908	ENSG00000011105
ENSG00000070501	ENSG00000137563
ENSG00000152977	ENSG00000112282
ENSG00000239569	ENSG00000136816
ENSG00000198795	ENSG00000127663
ENSG00000215908	ENSG00000156299
ENSG00000183020	ENSG00000198795
ENSG00000162521	ENSG00000198795
ENSG00000151276	ENSG00000152977
ENSG00000105229	ENSG00000156299
ENSG00000058600	ENSG00000198795
ENSG00000152977	ENSG00000137200
ENSG00000152977	ENSG00000124532
ENSG00000198795	ENSG00000159140
ENSG00000070501	ENSG00000123066
ENSG00000152977	ENSG00000103199
ENSG00000168246	ENSG00000065970
ENSG00000152977	ENSG00000047056
ENSG00000152977	ENSG00000130584
ENSG00000064703	ENSG00000152977
ENSG00000182606	ENSG00000152977
ENSG00000113240	ENSG00000148943
ENSG00000006468	ENSG00000165219
ENSG00000152977	ENSG00000100320
ENSG00000135124	ENSG00000101191
ENSG00000152977	ENSG00000105270
ENSG00000082258	ENSG00000003393
ENSG00000198795	ENSG00000156299
ENSG00000163877	ENSG00000152977
ENSG00000135124	ENSG00000088038
ENSG00000239569	ENSG00000005007
ENSG00000166398	ENSG00000156299
ENSG00000152977	ENSG00000070610
ENSG00000138606	ENSG00000260563
ENSG00000003393	ENSG00000068097
ENSG00000135124	ENSG00000103037
ENSG00000135124	ENSG00000104980
ENSG00000167395	ENSG00000156299
ENSG00000006468	ENSG00000058600
ENSG00000135124	ENSG00000141562
ENSG00000152977	ENSG00000138640
ENSG00000135124	ENSG00000108604
ENSG00000169926	ENSG00000198795
ENSG00000049246	ENSG00000139546
ENSG00000152977	ENSG00000100888
ENSG00000152977	ENSG00000100650
ENSG00000070501	ENSG00000058600
ENSG00000123643	ENSG00000198795
ENSG00000116213	ENSG00000070501
ENSG00000103264	ENSG00000198795
ENSG00000152977	ENSG00000241878
ENSG00000003393	ENSG00000024048
ENSG00000171824	ENSG00000070501
ENSG00000070501	ENSG00000186815
ENSG00000271895	ENSG00000135124
ENSG00000239569	ENSG00000140995
ENSG00000070501	ENSG00000168066
ENSG00000164631	ENSG00000135124
ENSG00000116213	ENSG00000006468
ENSG00000198795	ENSG00000147155
ENSG00000135124	ENSG00000213920
ENSG00000152977	ENSG00000167967
ENSG00000003393	ENSG00000136504
ENSG00000152977	ENSG00000005884
ENSG00000167972	ENSG00000198795
ENSG00000152977	ENSG00000108344
ENSG00000152977	ENSG00000130803
ENSG00000081791	ENSG00000135124
ENSG00000135124	ENSG00000125351
ENSG00000003393	ENSG00000173064
ENSG00000152977	ENSG00000087111
ENSG00000165915	ENSG00000135124
ENSG00000065970	ENSG00000043355
ENSG00000152977	ENSG00000159692
ENSG00000003393	ENSG00000110514
ENSG00000143437	ENSG00000156299
ENSG00000117682	ENSG00000054118
ENSG00000164048	ENSG00000198795
ENSG00000198795	ENSG00000099991
ENSG00000070501	ENSG00000066117
ENSG00000215908	ENSG00000257923
ENSG00000152977	ENSG00000159335
ENSG00000114098	ENSG00000168246
ENSG00000110171	ENSG00000156299
ENSG00000053254	ENSG00000182685
ENSG00000171467	ENSG00000070501
ENSG00000070501	ENSG00000177595
ENSG00000149136	ENSG00000135124
ENSG00000152977	ENSG00000178338
ENSG00000156026	ENSG00000159761
ENSG00000117682	ENSG00000092201
ENSG00000152977	ENSG00000188785
ENSG00000135124	ENSG00000187531
ENSG00000152977	ENSG00000166886
ENSG00000070501	ENSG00000139613
ENSG00000152977	ENSG00000137411
ENSG00000003393	ENSG00000001631
ENSG00000003393	ENSG00000145715
ENSG00000132879	ENSG00000198795
ENSG00000168785	ENSG00000198795
ENSG00000198795	ENSG00000156304
ENSG00000152977	ENSG00000074266
ENSG00000168763	ENSG00000070501
ENSG00000163877	ENSG00000135124
ENSG00000152464	ENSG00000135124
ENSG00000163050	ENSG00000198795
ENSG00000152977	ENSG00000119707
ENSG00000125484	ENSG00000135124
ENSG00000152977	ENSG00000100083
ENSG00000100908	ENSG00000198795
ENSG00000198795	ENSG00000100426
ENSG00000257815	ENSG00000135124
ENSG00000198795	ENSG00000102225
ENSG00000003393	ENSG00000128923
ENSG00000146830	ENSG00000070501
ENSG00000047315	ENSG00000156299
ENSG00000125386	ENSG00000070501
ENSG00000152977	ENSG00000132964
ENSG00000152977	ENSG00000221988
ENSG00000152977	ENSG00000100726
ENSG00000135124	ENSG00000189091
ENSG00000152977	ENSG00000052841
ENSG00000152977	ENSG00000250988
ENSG00000198795	ENSG00000105402
ENSG00000198795	ENSG00000105364
ENSG00000003393	ENSG00000160813
ENSG00000007237	ENSG00000156299
ENSG00000003393	ENSG00000149503
ENSG00000168395	ENSG00000198795
ENSG00000040487	ENSG00000156299
ENSG00000156983	ENSG00000198795
ENSG00000198795	ENSG00000104907
ENSG00000008405	ENSG00000135124
ENSG00000115275	ENSG00000152977
ENSG00000180901	ENSG00000198795
ENSG00000050405	ENSG00000103264
ENSG00000198795	ENSG00000242732
ENSG00000161204	ENSG00000156299
ENSG00000135124	ENSG00000109083
ENSG00000152977	ENSG00000125388
ENSG00000003393	ENSG00000168268
ENSG00000198795	ENSG00000088256
ENSG00000187257	ENSG00000135124
ENSG00000133878	ENSG00000070501
ENSG00000152977	ENSG00000186184
ENSG00000163788	ENSG00000198795
ENSG00000070501	ENSG00000173120
ENSG00000110171	ENSG00000053254
ENSG00000214367	ENSG00000135124
ENSG00000006468	ENSG00000137574
ENSG00000152977	ENSG00000240972
ENSG00000152977	ENSG00000136848
ENSG00000110583	ENSG00000198795
ENSG00000152977	ENSG00000152464
ENSG00000152977	ENSG00000152465
ENSG00000152977	ENSG00000100445
ENSG00000171603	ENSG00000152977
ENSG00000070501	ENSG00000065970
ENSG00000116754	ENSG00000003393
ENSG00000117682	ENSG00000204435
ENSG00000139546	ENSG00000111605
ENSG00000003393	ENSG00000112062
ENSG00000074755	ENSG00000198795
ENSG00000070501	ENSG00000182872
ENSG00000117682	ENSG00000159761
ENSG00000070047	ENSG00000135124
ENSG00000188827	ENSG00000156299
ENSG00000152977	ENSG00000137216
ENSG00000152977	ENSG00000071243
ENSG00000087087	ENSG00000070501
ENSG00000003393	ENSG00000099284
ENSG00000137171	ENSG00000135124
ENSG00000070501	ENSG00000182325
ENSG00000139546	ENSG00000043355
ENSG00000161013	ENSG00000198795
ENSG00000152977	ENSG00000076706
ENSG00000006468	ENSG00000108578
ENSG00000167962	ENSG00000156299
ENSG00000006468	ENSG00000065970
ENSG00000139546	ENSG00000154832
ENSG00000006468	ENSG00000076924
ENSG00000023330	ENSG00000198795
ENSG00000131149	ENSG00000156299
ENSG00000198795	ENSG00000065268
ENSG00000135124	ENSG00000132612
ENSG00000163918	ENSG00000135124
ENSG00000152977	ENSG00000136295
ENSG00000196363	ENSG00000198795
ENSG00000114098	ENSG00000139546
ENSG00000008869	ENSG00000156299
ENSG00000070501	ENSG00000101158
ENSG00000198795	ENSG00000104866
ENSG00000003393	ENSG00000157890
ENSG00000135124	ENSG00000108559
ENSG00000152977	ENSG00000182095
ENSG00000130713	ENSG00000198795
ENSG00000152977	ENSG00000127415
ENSG00000152977	ENSG00000218891
ENSG00000168566	ENSG00000006468
ENSG00000182095	ENSG00000198795
ENSG00000152977	ENSG00000149657
ENSG00000070501	ENSG00000048028
ENSG00000003393	ENSG00000134884
ENSG00000239569	ENSG00000169727
ENSG00000163026	ENSG00000152977
ENSG00000170265	ENSG00000070501
ENSG00000116213	ENSG00000239569
ENSG00000152977	ENSG00000167555
ENSG00000010322	ENSG00000198795
ENSG00000135775	ENSG00000152977
ENSG00000139546	ENSG00000180901

## Sheet: Cluster_2
GCN Cluster 2
ENSG00000132153	ENSG00000152977
ENSG00000035115	ENSG00000135124
ENSG00000080371	ENSG00000198795
ENSG00000119917	ENSG00000156299
ENSG00000166311	ENSG00000156299
ENSG00000056736	ENSG00000152977
ENSG00000132716	ENSG00000152977
ENSG00000104738	ENSG00000156299
ENSG00000181924	ENSG00000198795
ENSG00000134684	ENSG00000152977
ENSG00000136560	ENSG00000198795
ENSG00000173706	ENSG00000152977
ENSG00000156639	ENSG00000198795
ENSG00000244187	ENSG00000135124
ENSG00000132466	ENSG00000135124
ENSG00000129055	ENSG00000139546
ENSG00000117616	ENSG00000113240
ENSG00000113384	ENSG00000135124
ENSG00000120963	ENSG00000135124
ENSG00000100532	ENSG00000198795
ENSG00000115524	ENSG00000135124
ENSG00000003056	ENSG00000156299
ENSG00000148290	ENSG00000135124
ENSG00000204463	ENSG00000198795
ENSG00000130147	ENSG00000149639
ENSG00000240682	ENSG00000239569
ENSG00000143742	ENSG00000152977
ENSG00000189403	ENSG00000198795
ENSG00000162368	ENSG00000152977
ENSG00000198793	ENSG00000152977
ENSG00000011007	ENSG00000138606
ENSG00000161057	ENSG00000135124
ENSG00000225733	ENSG00000198795
ENSG00000167118	ENSG00000156299
ENSG00000106636	ENSG00000139546
ENSG00000114544	ENSG00000198795
ENSG00000232112	ENSG00000006468
ENSG00000119414	ENSG00000135124
ENSG00000164751	ENSG00000198795
ENSG00000173230	ENSG00000152977
ENSG00000136710	ENSG00000135124
ENSG00000164880	ENSG00000156299
ENSG00000106399	ENSG00000156299
ENSG00000182208	ENSG00000156299
ENSG00000198399	ENSG00000135124
ENSG00000104408	ENSG00000198795
ENSG00000144591	ENSG00000198795
ENSG00000008018	ENSG00000198795
ENSG00000186298	ENSG00000135124
ENSG00000168028	ENSG00000006468
ENSG00000273456	ENSG00000152977
ENSG00000127870	ENSG00000156299
ENSG00000136527	ENSG00000128191
ENSG00000112584	ENSG00000135124
ENSG00000068784	ENSG00000152977
ENSG00000151465	ENSG00000156299
ENSG00000163602	ENSG00000152977
ENSG00000116138	ENSG00000003393
ENSG00000060971	ENSG00000135124
ENSG00000134480	ENSG00000113240
ENSG00000119718	ENSG00000156299
ENSG00000156671	ENSG00000198795
ENSG00000173409	ENSG00000156299
ENSG00000198890	ENSG00000070501
ENSG00000165280	ENSG00000198795
ENSG00000198000	ENSG00000135124
ENSG00000143727	ENSG00000156299
ENSG00000143162	ENSG00000156299
ENSG00000143797	ENSG00000198795
ENSG00000143624	ENSG00000003393
ENSG00000196498	ENSG00000156299
ENSG00000087995	ENSG00000156299
ENSG00000143157	ENSG00000152977
ENSG00000124795	ENSG00000123119
ENSG00000163625	ENSG00000198795
ENSG00000168924	ENSG00000135124
ENSG00000131653	ENSG00000156299
ENSG00000143393	ENSG00000006468
ENSG00000115525	ENSG00000135124
ENSG00000179912	ENSG00000135124
ENSG00000135974	ENSG00000198795
ENSG00000145293	ENSG00000135124
ENSG00000143393	ENSG00000070501
ENSG00000074319	ENSG00000135124
ENSG00000049167	ENSG00000198795
ENSG00000168090	ENSG00000239569
ENSG00000110851	ENSG00000135124
ENSG00000070501	ENSG00000104164
ENSG00000162976	ENSG00000152977
ENSG00000132406	ENSG00000070501
ENSG00000132467	ENSG00000135124
ENSG00000107854	ENSG00000198795
ENSG00000143314	ENSG00000139546
ENSG00000166275	ENSG00000198795
ENSG00000128563	ENSG00000135124
ENSG00000160551	ENSG00000198795
ENSG00000166224	ENSG00000198795
ENSG00000171204	ENSG00000198795
ENSG00000142864	ENSG00000135124
ENSG00000112697	ENSG00000070501
ENSG00000143353	ENSG00000152977
ENSG00000180667	ENSG00000003393
ENSG00000169599	ENSG00000135124
ENSG00000152601	ENSG00000135124
ENSG00000086232	ENSG00000138606
ENSG00000086598	ENSG00000198795
ENSG00000118096	ENSG00000198795
ENSG00000137216	ENSG00000198795
ENSG00000137941	ENSG00000152977
ENSG00000113621	ENSG00000070501
ENSG00000088451	ENSG00000198795
ENSG00000175220	ENSG00000149639
ENSG00000104177	ENSG00000198795
ENSG00000196923	ENSG00000113240
ENSG00000111845	ENSG00000135124
ENSG00000137575	ENSG00000198795
ENSG00000104763	ENSG00000198795
ENSG00000159596	ENSG00000152977
ENSG00000117614	ENSG00000135124
ENSG00000142330	ENSG00000198795
ENSG00000114857	ENSG00000152977
ENSG00000166822	ENSG00000198795
ENSG00000111731	ENSG00000139546
ENSG00000183291	ENSG00000135124
ENSG00000159596	ENSG00000113240
ENSG00000162413	ENSG00000152977
ENSG00000116455	ENSG00000135124
ENSG00000165688	ENSG00000198795
ENSG00000160783	ENSG00000135124
ENSG00000175970	ENSG00000198795
ENSG00000163541	ENSG00000239569
ENSG00000164144	ENSG00000198795
ENSG00000204438	ENSG00000156299
ENSG00000158234	ENSG00000198795
ENSG00000151233	ENSG00000198795
ENSG00000240344	ENSG00000070501
ENSG00000234912	ENSG00000198795
ENSG00000115020	ENSG00000006468
ENSG00000170473	ENSG00000135124
ENSG00000129484	ENSG00000198795
ENSG00000115525	ENSG00000152977
ENSG00000127125	ENSG00000139546
ENSG00000116209	ENSG00000152977
ENSG00000137038	ENSG00000139546
ENSG00000066136	ENSG00000135124
ENSG00000138594	ENSG00000198795
ENSG00000115866	ENSG00000198795
ENSG00000122203	ENSG00000135124
ENSG00000167283	ENSG00000156299
ENSG00000145912	ENSG00000135124
ENSG00000038532	ENSG00000156299
ENSG00000116521	ENSG00000135124
ENSG00000142864	ENSG00000152977
ENSG00000139132	ENSG00000198795
ENSG00000068724	ENSG00000152977
ENSG00000088035	ENSG00000113240
ENSG00000140320	ENSG00000198795
ENSG00000115368	ENSG00000003393
ENSG00000148229	ENSG00000135124
ENSG00000196531	ENSG00000135124
ENSG00000153317	ENSG00000156299
ENSG00000176049	ENSG00000198795
ENSG00000168818	ENSG00000135124
ENSG00000140332	ENSG00000156299
ENSG00000005483	ENSG00000139546
ENSG00000136807	ENSG00000198795
ENSG00000115808	ENSG00000152977
ENSG00000198815	ENSG00000139546
ENSG00000162441	ENSG00000152977
ENSG00000130733	ENSG00000156299
ENSG00000140988	ENSG00000131171
ENSG00000174720	ENSG00000198795
ENSG00000179085	ENSG00000003393
ENSG00000166888	ENSG00000156299
ENSG00000065978	ENSG00000152977
ENSG00000176102	ENSG00000135124
ENSG00000138614	ENSG00000198795
ENSG00000102531	ENSG00000156299
ENSG00000117280	ENSG00000198795
ENSG00000092847	ENSG00000135124
ENSG00000159596	ENSG00000135124
ENSG00000204310	ENSG00000156299
ENSG00000249915	ENSG00000239569
ENSG00000204267	ENSG00000011105
ENSG00000066135	ENSG00000152977
ENSG00000160959	ENSG00000198795
ENSG00000117222	ENSG00000198795
ENSG00000106591	ENSG00000070501
ENSG00000115275	ENSG00000070501
ENSG00000096070	ENSG00000070501
ENSG00000084072	ENSG00000113240
ENSG00000104365	ENSG00000070501
ENSG00000148362	ENSG00000198795
ENSG00000198925	ENSG00000152977
ENSG00000155363	ENSG00000149639
ENSG00000133961	ENSG00000198795
ENSG00000144043	ENSG00000070501
ENSG00000105983	ENSG00000156299
ENSG00000188725	ENSG00000156299
ENSG00000186635	ENSG00000149639
ENSG00000175416	ENSG00000198795
ENSG00000203705	ENSG00000070501
ENSG00000166313	ENSG00000156299
ENSG00000146833	ENSG00000135124
ENSG00000137449	ENSG00000198795
ENSG00000178104	ENSG00000152977
ENSG00000114867	ENSG00000070501
ENSG00000136213	ENSG00000156299
ENSG00000117000	ENSG00000113240
ENSG00000067560	ENSG00000152977
ENSG00000175854	ENSG00000198795
ENSG00000213625	ENSG00000072786
ENSG00000134313	ENSG00000152977
ENSG00000108592	ENSG00000156299
ENSG00000204308	ENSG00000156299
ENSG00000069849	ENSG00000152977
ENSG00000168118	ENSG00000198795
ENSG00000172878	ENSG00000003393
ENSG00000114302	ENSG00000198795
ENSG00000140564	ENSG00000198795
ENSG00000112357	ENSG00000156299
ENSG00000011566	ENSG00000152977
ENSG00000153207	ENSG00000135124
ENSG00000142327	ENSG00000070501
ENSG00000114503	ENSG00000006468
ENSG00000124562	ENSG00000139546
ENSG00000119203	ENSG00000135124
ENSG00000157500	ENSG00000006468
ENSG00000169021	ENSG00000156299
ENSG00000171792	ENSG00000198795
ENSG00000163162	ENSG00000113240
ENSG00000164117	ENSG00000198795
ENSG00000175348	ENSG00000135124
ENSG00000184967	ENSG00000198795
ENSG00000157869	ENSG00000198795
ENSG00000110048	ENSG00000135124
ENSG00000109689	ENSG00000113240
ENSG00000152700	ENSG00000198795
ENSG00000135631	ENSG00000152977
ENSG00000164258	ENSG00000135124
ENSG00000245060	ENSG00000198795
ENSG00000116199	ENSG00000003393
ENSG00000115392	ENSG00000152977
ENSG00000145782	ENSG00000198795
ENSG00000138085	ENSG00000152977
ENSG00000090263	ENSG00000070501
ENSG00000114120	ENSG00000113240
ENSG00000213281	ENSG00000152977
ENSG00000110108	ENSG00000156299
ENSG00000134825	ENSG00000139546
ENSG00000060642	ENSG00000135124
ENSG00000110074	ENSG00000198795
ENSG00000117408	ENSG00000152977
ENSG00000173486	ENSG00000135124
ENSG00000138459	ENSG00000198795
ENSG00000144182	ENSG00000198795
ENSG00000024862	ENSG00000156299
ENSG00000137106	ENSG00000139546
ENSG00000173230	ENSG00000135124
ENSG00000143486	ENSG00000139546
ENSG00000118965	ENSG00000113240
ENSG00000084636	ENSG00000152977
ENSG00000048544	ENSG00000135124
ENSG00000104412	ENSG00000198795
ENSG00000163875	ENSG00000070501
ENSG00000115657	ENSG00000152977
ENSG00000172172	ENSG00000198795
ENSG00000168002	ENSG00000135124
ENSG00000141385	ENSG00000156299
ENSG00000120686	ENSG00000198795
ENSG00000162408	ENSG00000152977
ENSG00000128708	ENSG00000198795
ENSG00000184203	ENSG00000070501
ENSG00000059758	ENSG00000156299
ENSG00000102580	ENSG00000198795
ENSG00000117697	ENSG00000198795
ENSG00000145833	ENSG00000135124
ENSG00000169228	ENSG00000198795
ENSG00000104047	ENSG00000156299
ENSG00000102606	ENSG00000198795
ENSG00000170260	ENSG00000135124
ENSG00000137200	ENSG00000156299
ENSG00000177225	ENSG00000099889
ENSG00000152620	ENSG00000198795
ENSG00000159063	ENSG00000156299
ENSG00000143977	ENSG00000198795
ENSG00000071051	ENSG00000156299
ENSG00000115145	ENSG00000198795
ENSG00000162813	ENSG00000139546
ENSG00000111906	ENSG00000070501
ENSG00000182903	ENSG00000135124
ENSG00000165264	ENSG00000156299
ENSG00000198815	ENSG00000003393
ENSG00000024048	ENSG00000135124
ENSG00000146109	ENSG00000135124
ENSG00000107779	ENSG00000198795
ENSG00000153201	ENSG00000135124
ENSG00000065526	ENSG00000135124
ENSG00000093183	ENSG00000135124
ENSG00000164754	ENSG00000198795
ENSG00000136715	ENSG00000135124
ENSG00000084652	ENSG00000070501
ENSG00000144029	ENSG00000139546
ENSG00000070501	ENSG00000100503
ENSG00000076201	ENSG00000070501
ENSG00000086065	ENSG00000135124
ENSG00000123154	ENSG00000156299
ENSG00000168958	ENSG00000006468
ENSG00000125691	ENSG00000198795
ENSG00000114853	ENSG00000152977
ENSG00000121897	ENSG00000070501
ENSG00000157216	ENSG00000003393
ENSG00000132906	ENSG00000135124
ENSG00000151498	ENSG00000198795
ENSG00000138613	ENSG00000198795
ENSG00000136819	ENSG00000198795
ENSG00000169379	ENSG00000152977
ENSG00000215256	ENSG00000156299
ENSG00000120656	ENSG00000135124
ENSG00000168374	ENSG00000152977
ENSG00000137814	ENSG00000198795
ENSG00000204310	ENSG00000070501
ENSG00000247271	ENSG00000198795
ENSG00000163743	ENSG00000070501
ENSG00000118482	ENSG00000198795
ENSG00000135766	ENSG00000198795
ENSG00000113851	ENSG00000152977
ENSG00000203993	ENSG00000139546
ENSG00000170142	ENSG00000135124
ENSG00000133704	ENSG00000135124
ENSG00000138073	ENSG00000135124
ENSG00000104517	ENSG00000135124
ENSG00000165006	ENSG00000135124
ENSG00000187231	ENSG00000152977
ENSG00000102858	ENSG00000198795
ENSG00000136878	ENSG00000139546
ENSG00000116874	ENSG00000156299
ENSG00000090238	ENSG00000198795
ENSG00000164011	ENSG00000152977
ENSG00000135940	ENSG00000139546
ENSG00000146834	ENSG00000135124
ENSG00000116977	ENSG00000003393
ENSG00000136521	ENSG00000070501
ENSG00000197323	ENSG00000139546
ENSG00000116984	ENSG00000003393
ENSG00000144468	ENSG00000072786
ENSG00000011007	ENSG00000152977
ENSG00000164307	ENSG00000156299
ENSG00000166477	ENSG00000156299
ENSG00000114867	ENSG00000156299
ENSG00000143376	ENSG00000043355
ENSG00000108771	ENSG00000198795
ENSG00000162384	ENSG00000135124
ENSG00000180104	ENSG00000099889
ENSG00000135838	ENSG00000152977
ENSG00000160917	ENSG00000198795
ENSG00000124596	ENSG00000139546
ENSG00000181396	ENSG00000156299
ENSG00000114503	ENSG00000156299
ENSG00000119760	ENSG00000152977
ENSG00000136875	ENSG00000135124
ENSG00000132612	ENSG00000198795
ENSG00000117139	ENSG00000152977
ENSG00000151353	ENSG00000156299
ENSG00000073614	ENSG00000198795
ENSG00000163527	ENSG00000135124
ENSG00000118961	ENSG00000135124
ENSG00000198742	ENSG00000198795
ENSG00000122566	ENSG00000135124
ENSG00000117448	ENSG00000139546
ENSG00000213516	ENSG00000152977
ENSG00000151748	ENSG00000198795
ENSG00000245937	ENSG00000135124
ENSG00000117640	ENSG00000135124
ENSG00000133065	ENSG00000152977
ENSG00000021574	ENSG00000152977
ENSG00000172086	ENSG00000152977
ENSG00000126247	ENSG00000099889
ENSG00000128595	ENSG00000135124
ENSG00000188786	ENSG00000070501
ENSG00000175216	ENSG00000156299
ENSG00000069248	ENSG00000152977
ENSG00000162236	ENSG00000156299
ENSG00000003509	ENSG00000003393
ENSG00000149100	ENSG00000135124
ENSG00000154079	ENSG00000156299
ENSG00000162385	ENSG00000135124
ENSG00000188542	ENSG00000152977
ENSG00000142751	ENSG00000135124
ENSG00000159069	ENSG00000198795
ENSG00000162980	ENSG00000152977
ENSG00000151743	ENSG00000156299
ENSG00000117899	ENSG00000198795
ENSG00000110871	ENSG00000198795
ENSG00000205903	ENSG00000070501
ENSG00000139233	ENSG00000135124
ENSG00000164587	ENSG00000135124
ENSG00000097007	ENSG00000149639
ENSG00000115295	ENSG00000198795
ENSG00000148335	ENSG00000198795
ENSG00000172046	ENSG00000070501
ENSG00000175482	ENSG00000139546
ENSG00000120333	ENSG00000152977
ENSG00000179091	ENSG00000135124
ENSG00000182827	ENSG00000152977
ENSG00000164167	ENSG00000113240
ENSG00000143553	ENSG00000003393
ENSG00000117335	ENSG00000003393
ENSG00000164054	ENSG00000099889
ENSG00000164808	ENSG00000135124
ENSG00000138796	ENSG00000198795
ENSG00000096063	ENSG00000198795
ENSG00000172239	ENSG00000135124
ENSG00000169221	ENSG00000156299
ENSG00000132286	ENSG00000135124
ENSG00000183726	ENSG00000198795
ENSG00000103653	ENSG00000156299
ENSG00000153037	ENSG00000070501
ENSG00000108175	ENSG00000156299
ENSG00000175467	ENSG00000135124
ENSG00000177565	ENSG00000156299
ENSG00000086232	ENSG00000135124
ENSG00000144647	ENSG00000198795
ENSG00000138035	ENSG00000072786
ENSG00000178537	ENSG00000198795
ENSG00000067704	ENSG00000156299
ENSG00000130147	ENSG00000152977
ENSG00000124615	ENSG00000139546
ENSG00000214022	ENSG00000135124
ENSG00000144136	ENSG00000156299
ENSG00000137075	ENSG00000139546
ENSG00000108064	ENSG00000135124
ENSG00000183258	ENSG00000198795
ENSG00000117054	ENSG00000152977
ENSG00000137992	ENSG00000198795
ENSG00000144357	ENSG00000113240
ENSG00000133706	ENSG00000135124
ENSG00000224051	ENSG00000156299
ENSG00000168385	ENSG00000152977
ENSG00000108389	ENSG00000198795
ENSG00000163527	ENSG00000152977
ENSG00000068305	ENSG00000156299
ENSG00000137168	ENSG00000156299
ENSG00000145029	ENSG00000152977
ENSG00000178149	ENSG00000113240
ENSG00000142751	ENSG00000152977
ENSG00000164880	ENSG00000070501
ENSG00000072364	ENSG00000198795
ENSG00000213064	ENSG00000072786
ENSG00000162385	ENSG00000152977
ENSG00000173960	ENSG00000198795
ENSG00000187391	ENSG00000198795
ENSG00000120008	ENSG00000135124
ENSG00000083799	ENSG00000156299
ENSG00000136238	ENSG00000135124
ENSG00000174444	ENSG00000156299
ENSG00000011198	ENSG00000152977
ENSG00000135446	ENSG00000198795
ENSG00000117385	ENSG00000152977
ENSG00000138081	ENSG00000152977
ENSG00000115365	ENSG00000152977
ENSG00000122565	ENSG00000135124
ENSG00000111843	ENSG00000135124
ENSG00000109775	ENSG00000156299
ENSG00000062194	ENSG00000135124
ENSG00000163166	ENSG00000152977
ENSG00000173409	ENSG00000070501
ENSG00000253738	ENSG00000156299
ENSG00000120333	ENSG00000135124
ENSG00000198162	ENSG00000003393
ENSG00000143776	ENSG00000070501
ENSG00000178149	ENSG00000152977
ENSG00000111142	ENSG00000198795
ENSG00000135905	ENSG00000152977
ENSG00000144848	ENSG00000198795
ENSG00000118960	ENSG00000152977
ENSG00000143543	ENSG00000135124
ENSG00000137601	ENSG00000198795
ENSG00000228474	ENSG00000139546
ENSG00000106948	ENSG00000139546
ENSG00000148296	ENSG00000135124
ENSG00000070501	ENSG00000104388
ENSG00000143393	ENSG00000156299
ENSG00000143633	ENSG00000152977
ENSG00000104325	ENSG00000198795
ENSG00000137817	ENSG00000198795
ENSG00000103249	ENSG00000198795
ENSG00000091039	ENSG00000156299
ENSG00000135870	ENSG00000135124
ENSG00000269893	ENSG00000113240
ENSG00000119041	ENSG00000003393
ENSG00000114686	ENSG00000070501
ENSG00000131558	ENSG00000135124
ENSG00000164576	ENSG00000135124
ENSG00000110063	ENSG00000156299
ENSG00000183155	ENSG00000003393
ENSG00000196663	ENSG00000198795
ENSG00000162736	ENSG00000152977
ENSG00000112033	ENSG00000198795
ENSG00000136522	ENSG00000070501
ENSG00000082146	ENSG00000152977
ENSG00000119812	ENSG00000003393
ENSG00000112697	ENSG00000156299
ENSG00000153201	ENSG00000152977
ENSG00000065526	ENSG00000152977
ENSG00000142507	ENSG00000125450
ENSG00000093183	ENSG00000152977
ENSG00000136715	ENSG00000152977
ENSG00000137312	ENSG00000135124
ENSG00000170142	ENSG00000152977
ENSG00000144580	ENSG00000239569
ENSG00000163512	ENSG00000156299
ENSG00000090273	ENSG00000198795
ENSG00000198081	ENSG00000198795
ENSG00000154122	ENSG00000135124
ENSG00000206527	ENSG00000152977
ENSG00000168300	ENSG00000198795
ENSG00000113851	ENSG00000135124
ENSG00000120656	ENSG00000152977
ENSG00000168374	ENSG00000135124
ENSG00000113621	ENSG00000156299
ENSG00000163041	ENSG00000152977
ENSG00000115364	ENSG00000152977
ENSG00000129480	ENSG00000198795
ENSG00000151240	ENSG00000135124
ENSG00000178950	ENSG00000135124
ENSG00000178467	ENSG00000152977
ENSG00000162384	ENSG00000152977
ENSG00000182473	ENSG00000099889
ENSG00000115128	ENSG00000152977
ENSG00000196510	ENSG00000198795
ENSG00000143258	ENSG00000070501
ENSG00000056050	ENSG00000135124
ENSG00000011007	ENSG00000135124
ENSG00000121775	ENSG00000003393
ENSG00000197429	ENSG00000156299
ENSG00000132016	ENSG00000156299
ENSG00000111707	ENSG00000241878
ENSG00000060339	ENSG00000135124
ENSG00000173473	ENSG00000152977
ENSG00000204469	ENSG00000070501
ENSG00000084733	ENSG00000198795
ENSG00000060069	ENSG00000156299
ENSG00000143889	ENSG00000135124
ENSG00000147669	ENSG00000135124
ENSG00000187514	ENSG00000152977
ENSG00000196652	ENSG00000135124
ENSG00000140043	ENSG00000198795
ENSG00000132305	ENSG00000003393
ENSG00000122218	ENSG00000003393
ENSG00000117448	ENSG00000152977
ENSG00000112874	ENSG00000198795
ENSG00000152795	ENSG00000113240
ENSG00000153140	ENSG00000198795
ENSG00000138279	ENSG00000135124
ENSG00000114956	ENSG00000156299
ENSG00000180098	ENSG00000135124
ENSG00000168268	ENSG00000156299
ENSG00000115211	ENSG00000139546
ENSG00000187954	ENSG00000135124
ENSG00000151239	ENSG00000198795
ENSG00000143373	ENSG00000070501
ENSG00000131844	ENSG00000198795
ENSG00000003056	ENSG00000198795
ENSG00000198586	ENSG00000135124
ENSG00000154305	ENSG00000156299
ENSG00000100445	ENSG00000156299
ENSG00000115392	ENSG00000003393
ENSG00000168067	ENSG00000198795
ENSG00000178691	ENSG00000099889
ENSG00000145494	ENSG00000135124
ENSG00000198380	ENSG00000003393
ENSG00000131652	ENSG00000198795
ENSG00000242485	ENSG00000070501
ENSG00000107404	ENSG00000198795
ENSG00000164880	ENSG00000198795
ENSG00000198399	ENSG00000003393
ENSG00000182208	ENSG00000198795
ENSG00000080345	ENSG00000152977
ENSG00000196504	ENSG00000198795
ENSG00000130731	ENSG00000198795
ENSG00000168389	ENSG00000152977
ENSG00000112473	ENSG00000006468
ENSG00000108591	ENSG00000198795
ENSG00000101577	ENSG00000156299
ENSG00000146576	ENSG00000070501
ENSG00000172336	ENSG00000198795
ENSG00000138385	ENSG00000070501
ENSG00000115207	ENSG00000152977
ENSG00000198585	ENSG00000152977
ENSG00000150776	ENSG00000135124
ENSG00000164934	ENSG00000139546
ENSG00000139428	ENSG00000135124
ENSG00000165475	ENSG00000198795
ENSG00000011009	ENSG00000152977
ENSG00000143614	ENSG00000070501
ENSG00000005436	ENSG00000003393
ENSG00000123415	ENSG00000138606
ENSG00000143162	ENSG00000198795
ENSG00000172530	ENSG00000156299
ENSG00000108039	ENSG00000135124
ENSG00000008324	ENSG00000070501
ENSG00000137210	ENSG00000070501
ENSG00000213123	ENSG00000070501
ENSG00000169288	ENSG00000070501
ENSG00000163444	ENSG00000152977
ENSG00000131653	ENSG00000198795
ENSG00000204160	ENSG00000152977
ENSG00000096092	ENSG00000070501
ENSG00000172340	ENSG00000152977
ENSG00000168906	ENSG00000070501
ENSG00000151779	ENSG00000152977
ENSG00000137720	ENSG00000156299
ENSG00000178188	ENSG00000198795
ENSG00000143751	ENSG00000152977
ENSG00000115053	ENSG00000152977
ENSG00000177225	ENSG00000135124
ENSG00000178567	ENSG00000070501
ENSG00000213639	ENSG00000135124
ENSG00000151092	ENSG00000006468
ENSG00000082213	ENSG00000070501
ENSG00000166275	ENSG00000156299
ENSG00000149930	ENSG00000198795
ENSG00000103194	ENSG00000198795
ENSG00000114520	ENSG00000152977
ENSG00000134697	ENSG00000152977
ENSG00000112685	ENSG00000006468
ENSG00000119844	ENSG00000135124
ENSG00000188612	ENSG00000156299
ENSG00000068697	ENSG00000198795
ENSG00000101654	ENSG00000156299
ENSG00000025800	ENSG00000135124
ENSG00000081154	ENSG00000152977
ENSG00000165526	ENSG00000135124
ENSG00000117450	ENSG00000152977
ENSG00000130559	ENSG00000135124
ENSG00000115944	ENSG00000070501
ENSG00000154813	ENSG00000135124
ENSG00000122481	ENSG00000198795
ENSG00000163807	ENSG00000152977
ENSG00000137337	ENSG00000070501
ENSG00000106803	ENSG00000198795
ENSG00000137575	ENSG00000156299
ENSG00000117000	ENSG00000003393
ENSG00000164011	ENSG00000139546
ENSG00000090989	ENSG00000135124
ENSG00000142875	ENSG00000152977
ENSG00000075239	ENSG00000135124
ENSG00000156508	ENSG00000198795
ENSG00000077549	ENSG00000135124
ENSG00000138668	ENSG00000135124
ENSG00000123064	ENSG00000156299
ENSG00000112237	ENSG00000070501
ENSG00000204469	ENSG00000198795
ENSG00000170619	ENSG00000156299
ENSG00000086015	ENSG00000156299
ENSG00000165688	ENSG00000156299
ENSG00000103245	ENSG00000198795
ENSG00000162244	ENSG00000152977
ENSG00000127022	ENSG00000198795
ENSG00000132842	ENSG00000198795
ENSG00000065491	ENSG00000198795
ENSG00000102805	ENSG00000198795
ENSG00000144029	ENSG00000135124
ENSG00000117713	ENSG00000070501
ENSG00000224870	ENSG00000152977
ENSG00000168303	ENSG00000070501
ENSG00000176142	ENSG00000152977
ENSG00000085365	ENSG00000070501
ENSG00000170242	ENSG00000156299
ENSG00000198843	ENSG00000135124
ENSG00000124383	ENSG00000135124
ENSG00000134248	ENSG00000198795
ENSG00000182158	ENSG00000149639
ENSG00000079999	ENSG00000156299
ENSG00000111906	ENSG00000198795
ENSG00000123992	ENSG00000139546
ENSG00000173744	ENSG00000135124
ENSG00000164022	ENSG00000198795
ENSG00000174953	ENSG00000113240
ENSG00000092978	ENSG00000003393
ENSG00000213639	ENSG00000152977
ENSG00000165678	ENSG00000156299
ENSG00000108523	ENSG00000156299
ENSG00000116171	ENSG00000152977
ENSG00000136807	ENSG00000156299
ENSG00000074266	ENSG00000135124
ENSG00000119787	ENSG00000152977
ENSG00000136856	ENSG00000156299
ENSG00000139168	ENSG00000198795
ENSG00000143093	ENSG00000152977
ENSG00000048649	ENSG00000198795
ENSG00000117597	ENSG00000003393
ENSG00000122882	ENSG00000156299
ENSG00000154813	ENSG00000152977
ENSG00000163683	ENSG00000070501
ENSG00000159346	ENSG00000198795
ENSG00000174177	ENSG00000198795
ENSG00000006744	ENSG00000099889
ENSG00000172932	ENSG00000198795
ENSG00000172954	ENSG00000003393
ENSG00000025800	ENSG00000152977
ENSG00000090863	ENSG00000198795
ENSG00000162384	ENSG00000139546
ENSG00000104442	ENSG00000156299
ENSG00000174606	ENSG00000156299
ENSG00000231584	ENSG00000152977
ENSG00000081870	ENSG00000135124
ENSG00000173821	ENSG00000149639
ENSG00000180667	ENSG00000152977
ENSG00000108528	ENSG00000198795
ENSG00000128463	ENSG00000156299
ENSG00000105856	ENSG00000198795
ENSG00000132361	ENSG00000198795
ENSG00000188725	ENSG00000198795
ENSG00000166313	ENSG00000198795
ENSG00000137338	ENSG00000198795
ENSG00000145715	ENSG00000113240
ENSG00000137449	ENSG00000156299
ENSG00000057019	ENSG00000152977
ENSG00000033800	ENSG00000156299
ENSG00000116288	ENSG00000239569
ENSG00000203993	ENSG00000135124
ENSG00000114395	ENSG00000152977
ENSG00000188807	ENSG00000156299
ENSG00000168883	ENSG00000239569
ENSG00000165006	ENSG00000139546
ENSG00000160714	ENSG00000198795
ENSG00000180098	ENSG00000152977
ENSG00000128915	ENSG00000198795
ENSG00000156650	ENSG00000139546
ENSG00000157193	ENSG00000152977
ENSG00000163069	ENSG00000198795
ENSG00000204308	ENSG00000198795
ENSG00000136161	ENSG00000198795
ENSG00000140564	ENSG00000156299
ENSG00000097033	ENSG00000198795
ENSG00000204568	ENSG00000135124
ENSG00000132912	ENSG00000135124
ENSG00000120709	ENSG00000198795
ENSG00000130717	ENSG00000135124
ENSG00000230896	ENSG00000070501
ENSG00000130165	ENSG00000156299
ENSG00000172354	ENSG00000139546
ENSG00000118900	ENSG00000198795
ENSG00000135486	ENSG00000135124
ENSG00000179152	ENSG00000152977
ENSG00000170445	ENSG00000198795
ENSG00000119979	ENSG00000135124
ENSG00000153936	ENSG00000113240
ENSG00000105968	ENSG00000198795
ENSG00000182199	ENSG00000156299
ENSG00000218739	ENSG00000070501
ENSG00000142186	ENSG00000198795
ENSG00000163428	ENSG00000198795
ENSG00000175482	ENSG00000135124
ENSG00000172888	ENSG00000152977
ENSG00000117533	ENSG00000139546
ENSG00000187391	ENSG00000128191
ENSG00000106554	ENSG00000139546
ENSG00000213699	ENSG00000135124
ENSG00000162430	ENSG00000070501
ENSG00000133835	ENSG00000072786
ENSG00000198771	ENSG00000152977
ENSG00000108599	ENSG00000156299
ENSG00000143624	ENSG00000152977
ENSG00000111530	ENSG00000135124
ENSG00000134318	ENSG00000152977
ENSG00000146066	ENSG00000139546
ENSG00000120686	ENSG00000156299
ENSG00000143321	ENSG00000070501
ENSG00000243317	ENSG00000198795
ENSG00000143753	ENSG00000152977
ENSG00000174132	ENSG00000070501
ENSG00000104320	ENSG00000156299
ENSG00000016391	ENSG00000152977
ENSG00000085274	ENSG00000135124
ENSG00000008256	ENSG00000070501
ENSG00000143158	ENSG00000113240
ENSG00000121989	ENSG00000152977
ENSG00000124532	ENSG00000135124
ENSG00000106948	ENSG00000149639
ENSG00000120314	ENSG00000156299
ENSG00000137200	ENSG00000198795
ENSG00000198830	ENSG00000198795
ENSG00000119041	ENSG00000113240
ENSG00000159063	ENSG00000198795
ENSG00000148229	ENSG00000139546
ENSG00000063978	ENSG00000135124
ENSG00000237310	ENSG00000070501
ENSG00000111802	ENSG00000135124
ENSG00000168818	ENSG00000139546
ENSG00000071051	ENSG00000198795
ENSG00000005483	ENSG00000135124
ENSG00000069956	ENSG00000156299
ENSG00000136279	ENSG00000135124
ENSG00000125611	ENSG00000139546
ENSG00000198815	ENSG00000135124
ENSG00000166197	ENSG00000135124
ENSG00000106588	ENSG00000198795
ENSG00000129028	ENSG00000156299
ENSG00000153201	ENSG00000003393
ENSG00000137038	ENSG00000135124
ENSG00000029363	ENSG00000135124
ENSG00000139644	ENSG00000198795
ENSG00000130770	ENSG00000070501
ENSG00000177000	ENSG00000198795
ENSG00000151292	ENSG00000070501
ENSG00000070367	ENSG00000198795
ENSG00000164975	ENSG00000135124
ENSG00000198648	ENSG00000152977
ENSG00000146282	ENSG00000135124
ENSG00000132718	ENSG00000113240
ENSG00000130956	ENSG00000135124
ENSG00000134077	ENSG00000135124
ENSG00000181555	ENSG00000135124
ENSG00000144233	ENSG00000135124
ENSG00000172493	ENSG00000072786
ENSG00000155729	ENSG00000152977
ENSG00000163041	ENSG00000003393
ENSG00000141391	ENSG00000156299
ENSG00000131165	ENSG00000198795
ENSG00000272106	ENSG00000156299
ENSG00000114388	ENSG00000135124
ENSG00000122140	ENSG00000198795
ENSG00000166181	ENSG00000099889
ENSG00000172757	ENSG00000135124
ENSG00000057252	ENSG00000152977
ENSG00000170903	ENSG00000135124
ENSG00000109919	ENSG00000139546
ENSG00000180370	ENSG00000198795
ENSG00000149743	ENSG00000139546
ENSG00000204231	ENSG00000198795
ENSG00000182534	ENSG00000156299
ENSG00000170604	ENSG00000156299
ENSG00000148384	ENSG00000198795
ENSG00000120925	ENSG00000135124
ENSG00000134717	ENSG00000113240
ENSG00000135090	ENSG00000135124
ENSG00000123737	ENSG00000113240
ENSG00000168724	ENSG00000135124
ENSG00000114107	ENSG00000070501
ENSG00000134333	ENSG00000156299
ENSG00000184500	ENSG00000072786
ENSG00000163933	ENSG00000139546
ENSG00000106608	ENSG00000198795
ENSG00000119013	ENSG00000135124
ENSG00000114742	ENSG00000006468
ENSG00000130227	ENSG00000135124
ENSG00000171311	ENSG00000135124
ENSG00000115128	ENSG00000003393
ENSG00000055044	ENSG00000113240
ENSG00000008988	ENSG00000198795
ENSG00000083168	ENSG00000070501
ENSG00000144357	ENSG00000003393
ENSG00000164031	ENSG00000070501
ENSG00000197579	ENSG00000135124
ENSG00000131788	ENSG00000156299
ENSG00000114503	ENSG00000198795
ENSG00000009307	ENSG00000152977
ENSG00000128607	ENSG00000135124
ENSG00000181061	ENSG00000152977
ENSG00000132612	ENSG00000156299
ENSG00000115998	ENSG00000152977
ENSG00000070831	ENSG00000152977
ENSG00000112592	ENSG00000135124
ENSG00000105401	ENSG00000156299
ENSG00000151353	ENSG00000198795
ENSG00000060642	ENSG00000139546
ENSG00000072210	ENSG00000156299
ENSG00000145741	ENSG00000135124
ENSG00000115325	ENSG00000152977
ENSG00000254986	ENSG00000156299
ENSG00000117751	ENSG00000198795
ENSG00000127603	ENSG00000072786
ENSG00000109184	ENSG00000070501
ENSG00000124006	ENSG00000152977
ENSG00000211460	ENSG00000152977
ENSG00000059728	ENSG00000152977
ENSG00000198954	ENSG00000156299
ENSG00000160410	ENSG00000149639
ENSG00000145022	ENSG00000135124
ENSG00000253729	ENSG00000156299
ENSG00000145782	ENSG00000070501
ENSG00000170876	ENSG00000152977
ENSG00000144228	ENSG00000152977
ENSG00000184056	ENSG00000198795
ENSG00000138381	ENSG00000070501
ENSG00000182004	ENSG00000070501
ENSG00000131381	ENSG00000156299
ENSG00000186132	ENSG00000198795
ENSG00000168310	ENSG00000198795
ENSG00000134371	ENSG00000198795
ENSG00000163531	ENSG00000149639
ENSG00000181192	ENSG00000198795
ENSG00000218739	ENSG00000156299
ENSG00000246695	ENSG00000198795
ENSG00000166169	ENSG00000139546
ENSG00000151665	ENSG00000198795
ENSG00000048707	ENSG00000152977
ENSG00000213079	ENSG00000135124
ENSG00000175216	ENSG00000198795
ENSG00000162236	ENSG00000198795
ENSG00000144840	ENSG00000198795
ENSG00000003509	ENSG00000135124
ENSG00000145868	ENSG00000135124
ENSG00000162961	ENSG00000152977
ENSG00000155827	ENSG00000198795
ENSG00000154978	ENSG00000135124
ENSG00000160563	ENSG00000135124
ENSG00000175575	ENSG00000198795
ENSG00000170464	ENSG00000113240
ENSG00000104969	ENSG00000156299
ENSG00000173486	ENSG00000139546
ENSG00000167695	ENSG00000198795
ENSG00000148335	ENSG00000156299
ENSG00000131013	ENSG00000198795
ENSG00000150316	ENSG00000198795
ENSG00000115170	ENSG00000152977
ENSG00000259865	ENSG00000152977
ENSG00000152127	ENSG00000152977
ENSG00000172795	ENSG00000070501
ENSG00000143553	ENSG00000135124
ENSG00000157954	ENSG00000239569
ENSG00000143486	ENSG00000135124
ENSG00000197858	ENSG00000139546
ENSG00000109536	ENSG00000070501
ENSG00000083937	ENSG00000198795
ENSG00000048707	ENSG00000113240
ENSG00000115998	ENSG00000135124
ENSG00000116030	ENSG00000070501
ENSG00000169221	ENSG00000198795
ENSG00000148290	ENSG00000139546
ENSG00000155100	ENSG00000198795
ENSG00000110713	ENSG00000156299
ENSG00000179010	ENSG00000239569
ENSG00000164466	ENSG00000198795
ENSG00000181061	ENSG00000135124
ENSG00000164346	ENSG00000156299
ENSG00000147526	ENSG00000043355
ENSG00000167566	ENSG00000149639
ENSG00000153015	ENSG00000135124
ENSG00000105771	ENSG00000156299
ENSG00000070814	ENSG00000198795
ENSG00000153147	ENSG00000198795
ENSG00000107164	ENSG00000198795
ENSG00000173402	ENSG00000070501
ENSG00000166333	ENSG00000135124
ENSG00000067141	ENSG00000198795
ENSG00000157150	ENSG00000011105
ENSG00000114956	ENSG00000070501
ENSG00000123472	ENSG00000156299
ENSG00000169019	ENSG00000135124
ENSG00000143373	ENSG00000156299
ENSG00000086189	ENSG00000006468
ENSG00000163728	ENSG00000113240
ENSG00000112167	ENSG00000139546
ENSG00000174106	ENSG00000135124
ENSG00000163681	ENSG00000156299
ENSG00000169180	ENSG00000149639
ENSG00000117543	ENSG00000070501
ENSG00000055044	ENSG00000135124
ENSG00000213625	ENSG00000152977
ENSG00000011566	ENSG00000139546
ENSG00000119004	ENSG00000072786
ENSG00000100442	ENSG00000156299
ENSG00000224051	ENSG00000198795
ENSG00000211460	ENSG00000135124
ENSG00000104522	ENSG00000198795
ENSG00000129055	ENSG00000135124
ENSG00000136897	ENSG00000135124
ENSG00000169564	ENSG00000152977
ENSG00000107372	ENSG00000156299
ENSG00000168028	ENSG00000198795
ENSG00000175137	ENSG00000198795
ENSG00000154124	ENSG00000072786
ENSG00000112473	ENSG00000156299
ENSG00000144451	ENSG00000198795
ENSG00000205544	ENSG00000198795
ENSG00000144591	ENSG00000070501
ENSG00000146576	ENSG00000156299
ENSG00000072415	ENSG00000198795
ENSG00000083799	ENSG00000198795
ENSG00000138031	ENSG00000152977
ENSG00000138382	ENSG00000070501
ENSG00000197070	ENSG00000198795
ENSG00000229320	ENSG00000198795
ENSG00000174444	ENSG00000198795
ENSG00000141068	ENSG00000149639
ENSG00000118181	ENSG00000135124
ENSG00000143486	ENSG00000152977
ENSG00000109775	ENSG00000198795
ENSG00000075945	ENSG00000003393
ENSG00000147677	ENSG00000135124
ENSG00000177700	ENSG00000139546
ENSG00000008324	ENSG00000156299
ENSG00000135506	ENSG00000135124
ENSG00000116459	ENSG00000135124
ENSG00000163596	ENSG00000152977
ENSG00000135930	ENSG00000198795
ENSG00000082068	ENSG00000135124
ENSG00000198815	ENSG00000152977
ENSG00000155508	ENSG00000198795
ENSG00000149294	ENSG00000149639
ENSG00000121879	ENSG00000198795
ENSG00000198160	ENSG00000152977
ENSG00000121749	ENSG00000198795
ENSG00000068724	ENSG00000072786
ENSG00000096080	ENSG00000198795
ENSG00000109320	ENSG00000070501
ENSG00000110429	ENSG00000156299
ENSG00000143393	ENSG00000198795
ENSG00000156973	ENSG00000152977
ENSG00000204227	ENSG00000070501
ENSG00000073584	ENSG00000198795
ENSG00000137288	ENSG00000139546
ENSG00000103249	ENSG00000156299
ENSG00000028203	ENSG00000135124
ENSG00000157216	ENSG00000152977
ENSG00000181555	ENSG00000152977
ENSG00000116752	ENSG00000070501
ENSG00000120725	ENSG00000139546
ENSG00000144233	ENSG00000152977
ENSG00000157077	ENSG00000156299
ENSG00000183044	ENSG00000156299
ENSG00000006451	ENSG00000198795
ENSG00000106244	ENSG00000239569
ENSG00000013375	ENSG00000135124
ENSG00000163257	ENSG00000113240
ENSG00000114942	ENSG00000198795
ENSG00000196663	ENSG00000156299
ENSG00000181163	ENSG00000198795
ENSG00000182544	ENSG00000139546
ENSG00000177576	ENSG00000156299
ENSG00000134283	ENSG00000135124
ENSG00000163412	ENSG00000113240
ENSG00000138092	ENSG00000152977
ENSG00000198060	ENSG00000198795
ENSG00000119669	ENSG00000198795
ENSG00000145041	ENSG00000006468
ENSG00000113194	ENSG00000135124
ENSG00000111731	ENSG00000135124
ENSG00000174243	ENSG00000156299
ENSG00000146729	ENSG00000198795
ENSG00000110721	ENSG00000149639
ENSG00000168300	ENSG00000156299
ENSG00000111875	ENSG00000198795
ENSG00000118946	ENSG00000156299
ENSG00000115415	ENSG00000152977
ENSG00000215717	ENSG00000135124
ENSG00000111671	ENSG00000156299
ENSG00000197530	ENSG00000152977
ENSG00000067560	ENSG00000072786
ENSG00000077147	ENSG00000135124
ENSG00000134686	ENSG00000072786
ENSG00000138030	ENSG00000152977
ENSG00000198833	ENSG00000198795
ENSG00000109787	ENSG00000198795
ENSG00000156873	ENSG00000198795
ENSG00000116984	ENSG00000113240
ENSG00000152061	ENSG00000070501
ENSG00000079332	ENSG00000198795
ENSG00000162642	ENSG00000003393
ENSG00000158850	ENSG00000152977
ENSG00000136643	ENSG00000006468
ENSG00000136783	ENSG00000198795
ENSG00000152409	ENSG00000135124
ENSG00000251580	ENSG00000070501
ENSG00000116761	ENSG00000152977
ENSG00000130640	ENSG00000198795
ENSG00000081692	ENSG00000113240
ENSG00000197780	ENSG00000139546
ENSG00000162191	ENSG00000135124
ENSG00000205531	ENSG00000135124
ENSG00000168273	ENSG00000152977
ENSG00000166716	ENSG00000149639
ENSG00000184281	ENSG00000156299
ENSG00000158528	ENSG00000156299
ENSG00000179912	ENSG00000198795
ENSG00000116209	ENSG00000198795
ENSG00000115866	ENSG00000152977
ENSG00000135778	ENSG00000113240
ENSG00000237765	ENSG00000156299
ENSG00000148356	ENSG00000156299
ENSG00000113456	ENSG00000156299
ENSG00000140548	ENSG00000156299
ENSG00000174953	ENSG00000156299
ENSG00000169189	ENSG00000198795
ENSG00000168924	ENSG00000198795
ENSG00000171204	ENSG00000135124
ENSG00000171793	ENSG00000152977
ENSG00000127463	ENSG00000003393
ENSG00000113068	ENSG00000135124
ENSG00000169592	ENSG00000156299
ENSG00000213639	ENSG00000156299
ENSG00000157954	ENSG00000135124
ENSG00000144161	ENSG00000003393
ENSG00000120533	ENSG00000156299
ENSG00000204120	ENSG00000198795
ENSG00000117614	ENSG00000198795
ENSG00000163684	ENSG00000152977
ENSG00000143376	ENSG00000152977
ENSG00000184588	ENSG00000072786
ENSG00000180104	ENSG00000156299
ENSG00000198176	ENSG00000198795
ENSG00000198961	ENSG00000070501
ENSG00000215717	ENSG00000070501
ENSG00000117222	ENSG00000152977
ENSG00000155438	ENSG00000152977
ENSG00000142949	ENSG00000156299
ENSG00000215717	ENSG00000006468
ENSG00000143612	ENSG00000135124
ENSG00000152601	ENSG00000198795
ENSG00000136643	ENSG00000135124
ENSG00000115234	ENSG00000138606
ENSG00000149313	ENSG00000156299
ENSG00000127481	ENSG00000152977
ENSG00000174606	ENSG00000113240
ENSG00000123124	ENSG00000156299
ENSG00000134717	ENSG00000070501
ENSG00000173153	ENSG00000156299
ENSG00000152409	ENSG00000006468
ENSG00000167779	ENSG00000156299
ENSG00000109787	ENSG00000072786
ENSG00000114405	ENSG00000156299
ENSG00000204209	ENSG00000156299
ENSG00000181220	ENSG00000198795
ENSG00000142330	ENSG00000135124
ENSG00000067560	ENSG00000198795
ENSG00000157326	ENSG00000198795
ENSG00000127184	ENSG00000070501
ENSG00000143811	ENSG00000139546
ENSG00000070501	ENSG00000104331
ENSG00000188342	ENSG00000156299
ENSG00000114956	ENSG00000135124
ENSG00000070501	ENSG00000104442
ENSG00000143575	ENSG00000139546
ENSG00000153044	ENSG00000070501
ENSG00000163528	ENSG00000156299
ENSG00000090621	ENSG00000072786
ENSG00000116863	ENSG00000135124
ENSG00000162434	ENSG00000135124
ENSG00000114796	ENSG00000198795
ENSG00000127580	ENSG00000198795
ENSG00000139266	ENSG00000198795
ENSG00000065613	ENSG00000156299
ENSG00000102974	ENSG00000099889
ENSG00000116266	ENSG00000152977
ENSG00000084463	ENSG00000198795
ENSG00000151135	ENSG00000198795
ENSG00000086189	ENSG00000135124
ENSG00000159322	ENSG00000198795
ENSG00000129055	ENSG00000070501
ENSG00000248593	ENSG00000156299
ENSG00000249915	ENSG00000139546
ENSG00000174903	ENSG00000156299
ENSG00000172765	ENSG00000135124
ENSG00000077254	ENSG00000135124
ENSG00000211460	ENSG00000070501
ENSG00000086619	ENSG00000135124
ENSG00000124615	ENSG00000156299
ENSG00000124733	ENSG00000156299
ENSG00000204463	ENSG00000135124
ENSG00000175224	ENSG00000241878
ENSG00000138085	ENSG00000198795
ENSG00000164031	ENSG00000113240
ENSG00000118363	ENSG00000198795
ENSG00000115233	ENSG00000135124
ENSG00000213281	ENSG00000198795
ENSG00000113384	ENSG00000198795
ENSG00000055950	ENSG00000135124
ENSG00000094975	ENSG00000198795
ENSG00000124783	ENSG00000198795
ENSG00000138381	ENSG00000152977
ENSG00000245556	ENSG00000113240
ENSG00000169972	ENSG00000156299
ENSG00000063660	ENSG00000152977
ENSG00000127922	ENSG00000156299
ENSG00000138459	ENSG00000152977
ENSG00000166794	ENSG00000198795
ENSG00000151500	ENSG00000135124
ENSG00000116685	ENSG00000152977
ENSG00000140307	ENSG00000198795
ENSG00000182771	ENSG00000139546
ENSG00000144224	ENSG00000198795
ENSG00000124788	ENSG00000156299
ENSG00000143621	ENSG00000239569
ENSG00000185236	ENSG00000156299
ENSG00000229320	ENSG00000139546
ENSG00000135698	ENSG00000156299
ENSG00000137133	ENSG00000138606
ENSG00000117625	ENSG00000139546
ENSG00000125037	ENSG00000139546
ENSG00000114859	ENSG00000070501
ENSG00000137500	ENSG00000198795
ENSG00000147874	ENSG00000198795
ENSG00000168028	ENSG00000139546
ENSG00000145781	ENSG00000135124
ENSG00000148110	ENSG00000198795
ENSG00000129292	ENSG00000135124
ENSG00000144659	ENSG00000135124
ENSG00000062725	ENSG00000198795
ENSG00000186063	ENSG00000070501
ENSG00000169087	ENSG00000072786
ENSG00000004455	ENSG00000113240
ENSG00000171792	ENSG00000135124
ENSG00000115159	ENSG00000152977
ENSG00000087365	ENSG00000139546
ENSG00000136560	ENSG00000152977
ENSG00000116863	ENSG00000152977
ENSG00000164615	ENSG00000070501
ENSG00000228623	ENSG00000156299
ENSG00000117569	ENSG00000070501
ENSG00000166797	ENSG00000198795
ENSG00000173011	ENSG00000135124
ENSG00000114956	ENSG00000152977
ENSG00000106479	ENSG00000070501
ENSG00000128973	ENSG00000198795
ENSG00000118260	ENSG00000152977
ENSG00000081019	ENSG00000139546
ENSG00000081307	ENSG00000006468
ENSG00000092203	ENSG00000156299
ENSG00000163481	ENSG00000135124
ENSG00000138381	ENSG00000135124
ENSG00000257698	ENSG00000156299
ENSG00000198663	ENSG00000135124
ENSG00000154305	ENSG00000152977
ENSG00000145901	ENSG00000156299
ENSG00000143742	ENSG00000198795
ENSG00000118197	ENSG00000198795
ENSG00000122386	ENSG00000198795
ENSG00000153989	ENSG00000070501
ENSG00000111961	ENSG00000198795
ENSG00000126088	ENSG00000139546
ENSG00000165283	ENSG00000135124
ENSG00000162368	ENSG00000198795
ENSG00000035928	ENSG00000135124
ENSG00000175348	ENSG00000198795
ENSG00000090020	ENSG00000152977
ENSG00000157869	ENSG00000135124
ENSG00000131375	ENSG00000135124
ENSG00000080819	ENSG00000152977
ENSG00000225733	ENSG00000152977
ENSG00000107020	ENSG00000198795
ENSG00000084764	ENSG00000152977
ENSG00000114544	ENSG00000152977
ENSG00000162521	ENSG00000006468
ENSG00000105953	ENSG00000070501
ENSG00000108666	ENSG00000156299
ENSG00000269293	ENSG00000198795
ENSG00000213699	ENSG00000156299
ENSG00000166226	ENSG00000135124
ENSG00000153130	ENSG00000070501
ENSG00000144591	ENSG00000152977
ENSG00000155636	ENSG00000003393
ENSG00000074416	ENSG00000152977
ENSG00000143314	ENSG00000239569
ENSG00000126062	ENSG00000139546
ENSG00000214706	ENSG00000156299
ENSG00000198818	ENSG00000198795
ENSG00000165782	ENSG00000156299
ENSG00000109536	ENSG00000135124
ENSG00000138185	ENSG00000135124
ENSG00000123739	ENSG00000198795
ENSG00000241553	ENSG00000135124
ENSG00000179886	ENSG00000156299
ENSG00000162819	ENSG00000198795
ENSG00000168002	ENSG00000198795
ENSG00000014164	ENSG00000198795
ENSG00000167925	ENSG00000156299
ENSG00000245573	ENSG00000198795
ENSG00000163156	ENSG00000003393
ENSG00000166188	ENSG00000156299
ENSG00000075303	ENSG00000070501
ENSG00000143797	ENSG00000152977
ENSG00000008952	ENSG00000198795
ENSG00000272047	ENSG00000070501
ENSG00000151914	ENSG00000149639
ENSG00000077380	ENSG00000152977
ENSG00000137502	ENSG00000198795
ENSG00000154222	ENSG00000152977
ENSG00000055332	ENSG00000156299
ENSG00000005483	ENSG00000070501
ENSG00000131374	ENSG00000135124
ENSG00000170242	ENSG00000135124
ENSG00000111802	ENSG00000070501
ENSG00000137274	ENSG00000070501
ENSG00000196663	ENSG00000149639
ENSG00000174842	ENSG00000152977
ENSG00000184840	ENSG00000135124
ENSG00000066136	ENSG00000198795
ENSG00000014216	ENSG00000198795
ENSG00000123992	ENSG00000043355
ENSG00000163703	ENSG00000152977
ENSG00000143933	ENSG00000003393
ENSG00000141905	ENSG00000156299
ENSG00000179526	ENSG00000135124
ENSG00000140688	ENSG00000198795
ENSG00000099330	ENSG00000156299
ENSG00000157881	ENSG00000152977
ENSG00000047932	ENSG00000135124
ENSG00000127990	ENSG00000198795
ENSG00000144233	ENSG00000070501
ENSG00000249087	ENSG00000152977
ENSG00000181555	ENSG00000070501
ENSG00000091317	ENSG00000152977
ENSG00000151413	ENSG00000156299
ENSG00000173064	ENSG00000198795
ENSG00000166734	ENSG00000198795
ENSG00000184182	ENSG00000139546
ENSG00000178252	ENSG00000152977
ENSG00000153443	ENSG00000198795
ENSG00000080802	ENSG00000135124
ENSG00000072195	ENSG00000152977
ENSG00000015171	ENSG00000198795
ENSG00000076242	ENSG00000135124
ENSG00000078319	ENSG00000070501
ENSG00000143612	ENSG00000152977
ENSG00000143353	ENSG00000198795
ENSG00000049245	ENSG00000152977
ENSG00000138802	ENSG00000135124
ENSG00000138095	ENSG00000156299
ENSG00000163795	ENSG00000156299
ENSG00000049656	ENSG00000135124
ENSG00000167645	ENSG00000156299
ENSG00000081870	ENSG00000156299
ENSG00000156587	ENSG00000198795
ENSG00000155438	ENSG00000135124
ENSG00000072518	ENSG00000198795
ENSG00000231925	ENSG00000198795
ENSG00000143376	ENSG00000135124
ENSG00000169223	ENSG00000139546
ENSG00000115415	ENSG00000070501
ENSG00000214160	ENSG00000139546
ENSG00000100483	ENSG00000156299
ENSG00000131871	ENSG00000198795
ENSG00000125450	ENSG00000073169
ENSG00000146733	ENSG00000139546
ENSG00000138413	ENSG00000152977
ENSG00000142330	ENSG00000152977
ENSG00000151806	ENSG00000070501
ENSG00000183605	ENSG00000135124
ENSG00000198752	ENSG00000099889
ENSG00000140691	ENSG00000198795
ENSG00000114742	ENSG00000135124
ENSG00000110925	ENSG00000198795
ENSG00000116977	ENSG00000070501
ENSG00000086015	ENSG00000152977
ENSG00000158234	ENSG00000152977
ENSG00000054148	ENSG00000139546
ENSG00000180370	ENSG00000072786
ENSG00000107223	ENSG00000198795
ENSG00000162604	ENSG00000070501
ENSG00000183726	ENSG00000152977
ENSG00000109445	ENSG00000113240
ENSG00000047621	ENSG00000198795
ENSG00000066557	ENSG00000113240
ENSG00000095002	ENSG00000156299
ENSG00000135828	ENSG00000156299
ENSG00000011275	ENSG00000007545
ENSG00000131788	ENSG00000135124
ENSG00000144647	ENSG00000152977
ENSG00000017260	ENSG00000152977
ENSG00000151093	ENSG00000152977
ENSG00000136143	ENSG00000156299
ENSG00000149541	ENSG00000198795
ENSG00000065518	ENSG00000113240
ENSG00000144357	ENSG00000198795
ENSG00000034533	ENSG00000113240
ENSG00000009954	ENSG00000070501
ENSG00000115568	ENSG00000198795
ENSG00000128791	ENSG00000198795
ENSG00000143373	ENSG00000152977
ENSG00000138668	ENSG00000239569
ENSG00000102900	ENSG00000156299
ENSG00000117054	ENSG00000198795
ENSG00000123472	ENSG00000113240
ENSG00000077549	ENSG00000239569
ENSG00000197785	ENSG00000198795
ENSG00000114268	ENSG00000152977
ENSG00000118762	ENSG00000070501
ENSG00000145901	ENSG00000006468
ENSG00000078674	ENSG00000198795
ENSG00000107521	ENSG00000139546
ENSG00000115760	ENSG00000070501
ENSG00000185049	ENSG00000135124
ENSG00000125449	ENSG00000156299
ENSG00000175029	ENSG00000131171
ENSG00000097033	ENSG00000072786
ENSG00000125482	ENSG00000099889
ENSG00000163527	ENSG00000198795
ENSG00000143793	ENSG00000135124
ENSG00000156650	ENSG00000198795
ENSG00000164253	ENSG00000006468
ENSG00000110871	ENSG00000135124
ENSG00000109180	ENSG00000113240
ENSG00000139233	ENSG00000198795
ENSG00000244038	ENSG00000113240
ENSG00000164587	ENSG00000198795
ENSG00000089220	ENSG00000198795
ENSG00000126709	ENSG00000152977
ENSG00000119280	ENSG00000152977
ENSG00000242485	ENSG00000152977
ENSG00000143409	ENSG00000152977
ENSG00000166889	ENSG00000139546
ENSG00000173846	ENSG00000152977
ENSG00000243317	ENSG00000139546
ENSG00000116731	ENSG00000156299
ENSG00000223496	ENSG00000156299
ENSG00000100949	ENSG00000198795
ENSG00000130449	ENSG00000149639
ENSG00000136732	ENSG00000152977
ENSG00000183665	ENSG00000156299
ENSG00000214706	ENSG00000070501
ENSG00000183955	ENSG00000156299
ENSG00000171310	ENSG00000156299
ENSG00000136295	ENSG00000070501
ENSG00000115207	ENSG00000070501
ENSG00000108591	ENSG00000099889
ENSG00000163781	ENSG00000198795
ENSG00000172053	ENSG00000135124
ENSG00000122042	ENSG00000156299
ENSG00000206562	ENSG00000070501
ENSG00000143401	ENSG00000003393
ENSG00000137700	ENSG00000198795
ENSG00000198546	ENSG00000135124
ENSG00000143924	ENSG00000152977
ENSG00000179091	ENSG00000198795
ENSG00000272047	ENSG00000156299
ENSG00000143256	ENSG00000135124
ENSG00000133606	ENSG00000135124
ENSG00000168301	ENSG00000152977
ENSG00000075303	ENSG00000156299
ENSG00000144848	ENSG00000152977
ENSG00000087302	ENSG00000198795
ENSG00000113013	ENSG00000156299
ENSG00000069275	ENSG00000152977
ENSG00000138463	ENSG00000198795
ENSG00000146109	ENSG00000198795
ENSG00000071994	ENSG00000135124
ENSG00000124383	ENSG00000070501
ENSG00000140829	ENSG00000156299
ENSG00000168303	ENSG00000135124
ENSG00000168958	ENSG00000139546
ENSG00000179163	ENSG00000152977
ENSG00000113163	ENSG00000070501
ENSG00000198856	ENSG00000198795
ENSG00000074582	ENSG00000139546
ENSG00000198780	ENSG00000070501
ENSG00000187109	ENSG00000198795
ENSG00000168288	ENSG00000099889
ENSG00000115421	ENSG00000152977
ENSG00000214293	ENSG00000070501
ENSG00000181804	ENSG00000152977
ENSG00000043093	ENSG00000198795
ENSG00000116141	ENSG00000152977
ENSG00000144233	ENSG00000156299
ENSG00000173933	ENSG00000135124
ENSG00000175110	ENSG00000156299
ENSG00000117758	ENSG00000152977
ENSG00000132326	ENSG00000152977
ENSG00000151092	ENSG00000152977
ENSG00000137207	ENSG00000139546
ENSG00000177000	ENSG00000003393
ENSG00000134910	ENSG00000198795
ENSG00000171055	ENSG00000135124
ENSG00000004897	ENSG00000198795
ENSG00000103507	ENSG00000156299
ENSG00000082146	ENSG00000198795
ENSG00000108344	ENSG00000198795
ENSG00000204569	ENSG00000070501
ENSG00000135829	ENSG00000156299
ENSG00000110367	ENSG00000156299
ENSG00000081870	ENSG00000070501
ENSG00000170142	ENSG00000198795
ENSG00000131732	ENSG00000135124
ENSG00000147471	ENSG00000156299
ENSG00000117481	ENSG00000003393
ENSG00000144535	ENSG00000113240
ENSG00000163795	ENSG00000070501
ENSG00000094880	ENSG00000135124
ENSG00000165637	ENSG00000135124
ENSG00000125944	ENSG00000099889
ENSG00000185238	ENSG00000198795
ENSG00000131876	ENSG00000198795
ENSG00000151498	ENSG00000135124
ENSG00000213593	ENSG00000135124
ENSG00000163655	ENSG00000198795
ENSG00000115364	ENSG00000198795
ENSG00000095321	ENSG00000156299
ENSG00000149792	ENSG00000135124
ENSG00000187630	ENSG00000156299
ENSG00000070081	ENSG00000198795
ENSG00000115128	ENSG00000198795
ENSG00000181830	ENSG00000156299
ENSG00000031823	ENSG00000156299
ENSG00000234327	ENSG00000156299
ENSG00000153046	ENSG00000156299
ENSG00000114125	ENSG00000198795
ENSG00000132471	ENSG00000156299
ENSG00000085760	ENSG00000139546
ENSG00000151893	ENSG00000135124
ENSG00000188186	ENSG00000135124
ENSG00000123684	ENSG00000152977
ENSG00000013583	ENSG00000198795
ENSG00000113648	ENSG00000070501
ENSG00000152518	ENSG00000152977
ENSG00000143398	ENSG00000152977
ENSG00000084733	ENSG00000152977
ENSG00000163349	ENSG00000139546
ENSG00000117697	ENSG00000152977
ENSG00000124802	ENSG00000070501
ENSG00000110429	ENSG00000135124
ENSG00000117713	ENSG00000152977
ENSG00000204220	ENSG00000135124
ENSG00000136522	ENSG00000139546
ENSG00000126804	ENSG00000198795
ENSG00000115947	ENSG00000152977
ENSG00000132718	ENSG00000156299
ENSG00000085832	ENSG00000198795
ENSG00000148337	ENSG00000135124
ENSG00000237765	ENSG00000070501
ENSG00000120647	ENSG00000156299
ENSG00000115145	ENSG00000152977
ENSG00000092010	ENSG00000198795
ENSG00000145354	ENSG00000070501
ENSG00000247596	ENSG00000198795
ENSG00000169217	ENSG00000198795
ENSG00000121957	ENSG00000152977
ENSG00000169756	ENSG00000152977
ENSG00000144567	ENSG00000152977
ENSG00000011021	ENSG00000152977
ENSG00000065135	ENSG00000198795
ENSG00000119616	ENSG00000198795
ENSG00000117479	ENSG00000152977
ENSG00000171055	ENSG00000152977
ENSG00000213639	ENSG00000006468
ENSG00000162664	ENSG00000152977
ENSG00000117758	ENSG00000135124
ENSG00000011523	ENSG00000156299
ENSG00000213639	ENSG00000070501
ENSG00000151092	ENSG00000135124
ENSG00000112701	ENSG00000135124
ENSG00000112685	ENSG00000135124
ENSG00000114650	ENSG00000070501
ENSG00000118939	ENSG00000156299
ENSG00000117133	ENSG00000156299
ENSG00000215717	ENSG00000156299
ENSG00000124380	ENSG00000006468
ENSG00000148399	ENSG00000139546
ENSG00000115816	ENSG00000198795
ENSG00000091483	ENSG00000113240
ENSG00000180104	ENSG00000070501
ENSG00000168374	ENSG00000198795
ENSG00000030110	ENSG00000156299
ENSG00000138303	ENSG00000198795
ENSG00000162378	ENSG00000070501
ENSG00000174243	ENSG00000135124
ENSG00000104613	ENSG00000135124
ENSG00000124380	ENSG00000070501
ENSG00000034713	ENSG00000198795
ENSG00000136930	ENSG00000139546
ENSG00000184428	ENSG00000196123
ENSG00000135766	ENSG00000152977
ENSG00000132842	ENSG00000072786
ENSG00000137312	ENSG00000198795
ENSG00000162623	ENSG00000139546
ENSG00000163738	ENSG00000198795
ENSG00000143398	ENSG00000135124
ENSG00000129625	ENSG00000113240
ENSG00000114745	ENSG00000152977
ENSG00000124356	ENSG00000072786
ENSG00000117528	ENSG00000198795
ENSG00000164985	ENSG00000156299
ENSG00000125656	ENSG00000156299
ENSG00000198912	ENSG00000139546
ENSG00000204209	ENSG00000070501
ENSG00000150459	ENSG00000198795
ENSG00000157450	ENSG00000156299
ENSG00000018510	ENSG00000152977
ENSG00000158435	ENSG00000003393
ENSG00000127184	ENSG00000156299
ENSG00000151093	ENSG00000135124
ENSG00000136536	ENSG00000135124
ENSG00000166333	ENSG00000156299
ENSG00000144677	ENSG00000070501
ENSG00000150768	ENSG00000156299
ENSG00000115839	ENSG00000003393
ENSG00000134452	ENSG00000135124
ENSG00000114784	ENSG00000070501
ENSG00000131788	ENSG00000152977
ENSG00000017260	ENSG00000135124
ENSG00000196792	ENSG00000198795
ENSG00000198663	ENSG00000149639
ENSG00000064999	ENSG00000198795
ENSG00000127837	ENSG00000152977
ENSG00000183726	ENSG00000135124
ENSG00000169567	ENSG00000156299
ENSG00000013374	ENSG00000156299
ENSG00000056586	ENSG00000156299
ENSG00000113391	ENSG00000156299
ENSG00000143793	ENSG00000152977
ENSG00000198252	ENSG00000198795
ENSG00000132128	ENSG00000003393
ENSG00000133112	ENSG00000198795
ENSG00000124615	ENSG00000070501
ENSG00000143801	ENSG00000152977
ENSG00000115234	ENSG00000135124
ENSG00000141551	ENSG00000198795
ENSG00000135972	ENSG00000135124
ENSG00000107521	ENSG00000099889
ENSG00000145919	ENSG00000239569
ENSG00000143373	ENSG00000135124
ENSG00000148400	ENSG00000149639
ENSG00000188760	ENSG00000152977
ENSG00000144029	ENSG00000239569
ENSG00000011132	ENSG00000156299
ENSG00000196526	ENSG00000156299
ENSG00000172053	ENSG00000113240
ENSG00000218739	ENSG00000152977
ENSG00000144231	ENSG00000156299
ENSG00000159348	ENSG00000135124
ENSG00000173409	ENSG00000139546
ENSG00000108578	ENSG00000099889
ENSG00000152154	ENSG00000139546
ENSG00000162980	ENSG00000198795
ENSG00000164934	ENSG00000198795
ENSG00000242485	ENSG00000135124
ENSG00000001629	ENSG00000198795
ENSG00000143256	ENSG00000152977
ENSG00000090565	ENSG00000198795
ENSG00000168394	ENSG00000011105
ENSG00000120942	ENSG00000152977
ENSG00000170291	ENSG00000198795
ENSG00000120333	ENSG00000198795
ENSG00000122565	ENSG00000198795
ENSG00000259943	ENSG00000156299
ENSG00000215067	ENSG00000198795
ENSG00000126581	ENSG00000156299
ENSG00000136238	ENSG00000198795
ENSG00000121940	ENSG00000072786
ENSG00000186063	ENSG00000156299
ENSG00000155849	ENSG00000156299
ENSG00000145016	ENSG00000135124
ENSG00000177879	ENSG00000156299
ENSG00000165934	ENSG00000198795
ENSG00000166128	ENSG00000198795
ENSG00000109390	ENSG00000135124
ENSG00000117620	ENSG00000152977
ENSG00000134698	ENSG00000070501
ENSG00000163607	ENSG00000070501
ENSG00000135900	ENSG00000156299
ENSG00000170855	ENSG00000135124
ENSG00000126067	ENSG00000135124
ENSG00000135966	ENSG00000135124
ENSG00000148356	ENSG00000198795
ENSG00000113583	ENSG00000198795
ENSG00000134248	ENSG00000152977
ENSG00000118564	ENSG00000198795
ENSG00000074582	ENSG00000113240
ENSG00000036257	ENSG00000135124
ENSG00000088205	ENSG00000152977
ENSG00000121892	ENSG00000138606
ENSG00000133114	ENSG00000156299
ENSG00000106028	ENSG00000070501
ENSG00000144021	ENSG00000156299
ENSG00000204220	ENSG00000139546
ENSG00000137133	ENSG00000139546
ENSG00000168958	ENSG00000152977
ENSG00000130305	ENSG00000198795
ENSG00000213639	ENSG00000198795
ENSG00000054523	ENSG00000156299
ENSG00000116171	ENSG00000198795
ENSG00000114686	ENSG00000135124
ENSG00000134369	ENSG00000149639
ENSG00000114853	ENSG00000070501
ENSG00000160691	ENSG00000152977
ENSG00000168291	ENSG00000135124
ENSG00000156136	ENSG00000156299
ENSG00000198719	ENSG00000149639
ENSG00000090266	ENSG00000135124
ENSG00000175455	ENSG00000113240
ENSG00000168216	ENSG00000198795
ENSG00000187068	ENSG00000198795
ENSG00000164054	ENSG00000241878
ENSG00000147654	ENSG00000135124
ENSG00000168374	ENSG00000070501
ENSG00000122406	ENSG00000198795
ENSG00000159346	ENSG00000152977
ENSG00000115661	ENSG00000135124
ENSG00000143643	ENSG00000003393
ENSG00000116157	ENSG00000113240
ENSG00000152601	ENSG00000156299
ENSG00000183513	ENSG00000198795
ENSG00000178694	ENSG00000156299
ENSG00000143179	ENSG00000152977
ENSG00000163738	ENSG00000070501
ENSG00000160075	ENSG00000135124
ENSG00000065491	ENSG00000135124
ENSG00000173153	ENSG00000198795
ENSG00000105556	ENSG00000156299
ENSG00000175193	ENSG00000135124
ENSG00000056050	ENSG00000070501
ENSG00000085982	ENSG00000149639
ENSG00000182179	ENSG00000152977
ENSG00000143258	ENSG00000135124
ENSG00000070495	ENSG00000156299
ENSG00000188342	ENSG00000198795
ENSG00000114480	ENSG00000152977
ENSG00000160714	ENSG00000152977
ENSG00000116906	ENSG00000135124
ENSG00000115084	ENSG00000113240
ENSG00000146083	ENSG00000198795
ENSG00000064999	ENSG00000070501
ENSG00000097033	ENSG00000152977
ENSG00000186591	ENSG00000139546
ENSG00000260766	ENSG00000152977
ENSG00000115234	ENSG00000139546
ENSG00000177302	ENSG00000198795
ENSG00000109689	ENSG00000156299
ENSG00000144580	ENSG00000152977
ENSG00000084463	ENSG00000156299
ENSG00000236609	ENSG00000239569
ENSG00000112996	ENSG00000156299
ENSG00000151135	ENSG00000156299
ENSG00000158006	ENSG00000198795
ENSG00000060749	ENSG00000135124
ENSG00000168036	ENSG00000135124
ENSG00000152904	ENSG00000152977
ENSG00000099800	ENSG00000156299
ENSG00000144559	ENSG00000070501
ENSG00000138002	ENSG00000003393
ENSG00000179152	ENSG00000198795
ENSG00000163636	ENSG00000135124
ENSG00000133065	ENSG00000070501
ENSG00000113597	ENSG00000070501
ENSG00000090054	ENSG00000156299
ENSG00000120963	ENSG00000156299
ENSG00000198586	ENSG00000198795
ENSG00000169288	ENSG00000139546
ENSG00000136147	ENSG00000198795
ENSG00000147419	ENSG00000135124
ENSG00000092199	ENSG00000198795
ENSG00000127922	ENSG00000198795
ENSG00000151465	ENSG00000135124
ENSG00000163428	ENSG00000152977
ENSG00000175115	ENSG00000198795
ENSG00000169972	ENSG00000198795
ENSG00000127995	ENSG00000070501
ENSG00000126698	ENSG00000135124
ENSG00000144847	ENSG00000152977
ENSG00000160746	ENSG00000135124
ENSG00000160087	ENSG00000135124
ENSG00000170248	ENSG00000152977
ENSG00000141349	ENSG00000198795
ENSG00000136104	ENSG00000156299
ENSG00000127804	ENSG00000198795
ENSG00000173614	ENSG00000135124
ENSG00000174748	ENSG00000070501
ENSG00000167118	ENSG00000135124
ENSG00000086666	ENSG00000198795
ENSG00000126524	ENSG00000198795
ENSG00000138430	ENSG00000070501
ENSG00000131437	ENSG00000070501
ENSG00000112118	ENSG00000135124
ENSG00000173409	ENSG00000135124
ENSG00000198924	ENSG00000156299
ENSG00000124357	ENSG00000135124
ENSG00000143727	ENSG00000135124
ENSG00000131495	ENSG00000070501
ENSG00000122565	ENSG00000070501
ENSG00000117153	ENSG00000003393
ENSG00000124587	ENSG00000156299
ENSG00000062725	ENSG00000156299
ENSG00000111725	ENSG00000156299
ENSG00000115355	ENSG00000152977
ENSG00000242485	ENSG00000139546
ENSG00000167272	ENSG00000135124
ENSG00000116251	ENSG00000198795
ENSG00000170088	ENSG00000156299
ENSG00000164197	ENSG00000070501
ENSG00000054983	ENSG00000198795
ENSG00000175155	ENSG00000156299
ENSG00000175061	ENSG00000198795
ENSG00000163348	ENSG00000152977
ENSG00000132912	ENSG00000198795
ENSG00000055609	ENSG00000070501
ENSG00000121680	ENSG00000135124
ENSG00000134324	ENSG00000152977
ENSG00000116667	ENSG00000152977
ENSG00000204308	ENSG00000135124
ENSG00000107521	ENSG00000135124
ENSG00000146476	ENSG00000070501
ENSG00000014919	ENSG00000135124
ENSG00000065457	ENSG00000156299
ENSG00000160714	ENSG00000135124
ENSG00000144815	ENSG00000152977
ENSG00000136144	ENSG00000198795
ENSG00000143793	ENSG00000139546
ENSG00000070501	ENSG00000104231
ENSG00000065518	ENSG00000099889
ENSG00000115137	ENSG00000156299
ENSG00000105968	ENSG00000135124
ENSG00000249673	ENSG00000113240
ENSG00000011007	ENSG00000239569
ENSG00000198964	ENSG00000198795
ENSG00000087274	ENSG00000070501
ENSG00000168214	ENSG00000198795
ENSG00000163517	ENSG00000135124
ENSG00000143742	ENSG00000156299
ENSG00000122386	ENSG00000156299
ENSG00000135316	ENSG00000198795
ENSG00000138246	ENSG00000135124
ENSG00000163527	ENSG00000070501
ENSG00000164068	ENSG00000152977
ENSG00000117984	ENSG00000156299
ENSG00000099246	ENSG00000198795
ENSG00000106052	ENSG00000135124
ENSG00000119048	ENSG00000070501
ENSG00000152904	ENSG00000135124
ENSG00000131791	ENSG00000139546
ENSG00000111707	ENSG00000099889
ENSG00000214941	ENSG00000198795
ENSG00000132773	ENSG00000152977
ENSG00000140632	ENSG00000156299
ENSG00000175130	ENSG00000152977
ENSG00000079950	ENSG00000070501
ENSG00000133657	ENSG00000139546
ENSG00000068120	ENSG00000198795
ENSG00000121940	ENSG00000152977
ENSG00000196182	ENSG00000156299
ENSG00000169251	ENSG00000198795
ENSG00000142186	ENSG00000135124
ENSG00000165782	ENSG00000198795
ENSG00000115207	ENSG00000198795
ENSG00000121940	ENSG00000113240
ENSG00000135617	ENSG00000003393
ENSG00000137996	ENSG00000003393
ENSG00000170946	ENSG00000156299
ENSG00000133104	ENSG00000198795
ENSG00000178719	ENSG00000198795
ENSG00000156875	ENSG00000152977
ENSG00000152154	ENSG00000152977
ENSG00000173409	ENSG00000152977
ENSG00000117533	ENSG00000070501
ENSG00000106355	ENSG00000198795
ENSG00000165672	ENSG00000135124
ENSG00000113312	ENSG00000135124
ENSG00000129103	ENSG00000135124
ENSG00000143162	ENSG00000152977
ENSG00000176095	ENSG00000198795
ENSG00000151876	ENSG00000113240
ENSG00000148187	ENSG00000135124
ENSG00000116198	ENSG00000198795
ENSG00000176393	ENSG00000135124
ENSG00000114439	ENSG00000152977
ENSG00000143774	ENSG00000135124
ENSG00000120253	ENSG00000198795
ENSG00000135390	ENSG00000135124
ENSG00000115271	ENSG00000152977
ENSG00000135966	ENSG00000152977
ENSG00000198843	ENSG00000198795
ENSG00000172340	ENSG00000198795
ENSG00000145687	ENSG00000070501
ENSG00000014216	ENSG00000156299
ENSG00000198856	ENSG00000070501
ENSG00000083312	ENSG00000198795
ENSG00000170260	ENSG00000070501
ENSG00000124535	ENSG00000198795
ENSG00000171953	ENSG00000156299
ENSG00000144161	ENSG00000152977
ENSG00000146416	ENSG00000135124
ENSG00000177981	ENSG00000135124
ENSG00000158457	ENSG00000156299
ENSG00000116584	ENSG00000070501
ENSG00000133028	ENSG00000156299
ENSG00000127463	ENSG00000152977
ENSG00000225663	ENSG00000156299
ENSG00000005448	ENSG00000152977
ENSG00000116521	ENSG00000156299
ENSG00000138449	ENSG00000152977
ENSG00000219545	ENSG00000070501
ENSG00000065526	ENSG00000070501
ENSG00000163795	ENSG00000198795
ENSG00000187608	ENSG00000152977
ENSG00000124356	ENSG00000152977
ENSG00000126773	ENSG00000198795
ENSG00000176834	ENSG00000198795
ENSG00000138660	ENSG00000156299
ENSG00000117450	ENSG00000198795
ENSG00000217555	ENSG00000198795
ENSG00000156587	ENSG00000156299
ENSG00000117597	ENSG00000156299
ENSG00000129197	ENSG00000156299
ENSG00000113595	ENSG00000070501
ENSG00000188186	ENSG00000139546
ENSG00000167657	ENSG00000156299
ENSG00000136878	ENSG00000198795
ENSG00000144468	ENSG00000198795
ENSG00000086232	ENSG00000239569
ENSG00000125944	ENSG00000152977
ENSG00000132432	ENSG00000070501
ENSG00000138399	ENSG00000003393
ENSG00000089351	ENSG00000156299
ENSG00000114125	ENSG00000070501
ENSG00000115211	ENSG00000239569
ENSG00000136521	ENSG00000135124
ENSG00000223501	ENSG00000070501
ENSG00000146834	ENSG00000070501
ENSG00000188725	ENSG00000135124
ENSG00000213593	ENSG00000139546
ENSG00000081019	ENSG00000135124
ENSG00000160767	ENSG00000198795
ENSG00000164024	ENSG00000135124
ENSG00000124608	ENSG00000198795
ENSG00000197355	ENSG00000149639
ENSG00000127603	ENSG00000070501
ENSG00000164190	ENSG00000070501
ENSG00000146476	ENSG00000156299
ENSG00000228989	ENSG00000113240
ENSG00000178952	ENSG00000156299
ENSG00000130764	ENSG00000135124
ENSG00000153832	ENSG00000152977
ENSG00000177733	ENSG00000135124
ENSG00000163798	ENSG00000156299
ENSG00000132153	ENSG00000006468
ENSG00000144136	ENSG00000152977
ENSG00000135365	ENSG00000135124
ENSG00000160539	ENSG00000156299
ENSG00000186132	ENSG00000135124
ENSG00000186364	ENSG00000152977
ENSG00000117751	ENSG00000135124
ENSG00000087365	ENSG00000135124
ENSG00000143742	ENSG00000070501
ENSG00000132128	ENSG00000152977
ENSG00000164258	ENSG00000070501
ENSG00000118855	ENSG00000198795
ENSG00000119048	ENSG00000156299
ENSG00000041988	ENSG00000152977
ENSG00000138433	ENSG00000156299
ENSG00000163527	ENSG00000156299
ENSG00000164209	ENSG00000070501
ENSG00000116668	ENSG00000003393
ENSG00000085231	ENSG00000070501
ENSG00000174738	ENSG00000139546
ENSG00000198917	ENSG00000135124
ENSG00000068912	ENSG00000003393
ENSG00000117748	ENSG00000135124
ENSG00000257727	ENSG00000135124
ENSG00000048544	ENSG00000070501
ENSG00000152778	ENSG00000198795
ENSG00000168028	ENSG00000152977
ENSG00000106263	ENSG00000239569
ENSG00000173517	ENSG00000198795
ENSG00000175137	ENSG00000152977
ENSG00000124588	ENSG00000198795
ENSG00000185896	ENSG00000198795
ENSG00000144451	ENSG00000152977
ENSG00000144840	ENSG00000135124
ENSG00000162236	ENSG00000135124
ENSG00000070501	ENSG00000100442
ENSG00000169087	ENSG00000152977
ENSG00000149100	ENSG00000156299
ENSG00000116221	ENSG00000152977
ENSG00000232112	ENSG00000152977
ENSG00000148719	ENSG00000156299
ENSG00000185024	ENSG00000156299
ENSG00000175221	ENSG00000156299
ENSG00000162944	ENSG00000152977
ENSG00000163867	ENSG00000003393
ENSG00000109270	ENSG00000070501
ENSG00000055070	ENSG00000003393
ENSG00000135845	ENSG00000135124
ENSG00000176087	ENSG00000070501
ENSG00000054118	ENSG00000135124
ENSG00000113387	ENSG00000070501
ENSG00000174891	ENSG00000156299
ENSG00000163781	ENSG00000156299
ENSG00000197312	ENSG00000003393
ENSG00000137106	ENSG00000198795
ENSG00000110717	ENSG00000139546
ENSG00000116918	ENSG00000152977
ENSG00000122042	ENSG00000198795
ENSG00000143553	ENSG00000198795
ENSG00000143486	ENSG00000198795
ENSG00000137700	ENSG00000156299
ENSG00000248333	ENSG00000156299
ENSG00000148444	ENSG00000135124
ENSG00000122643	ENSG00000070501
ENSG00000099804	ENSG00000156299
ENSG00000197713	ENSG00000152977
ENSG00000148516	ENSG00000198795
ENSG00000055917	ENSG00000135124
ENSG00000126062	ENSG00000135124
ENSG00000137955	ENSG00000198795
ENSG00000189376	ENSG00000135124
ENSG00000204576	ENSG00000198795
ENSG00000145284	ENSG00000198795
ENSG00000089234	ENSG00000180901
[truncated: 2,980 more rows]
[truncated: 1 more columns]

## Sheet: Cluster_3
GCN Cluster 3
ENSG00000249242	ENSG00000108389
ENSG00000079819	ENSG00000141219
ENSG00000127252	ENSG00000156026
ENSG00000079819	ENSG00000197111
ENSG00000215039	ENSG00000149930
ENSG00000170017	ENSG00000186184
ENSG00000152137	ENSG00000159761
ENSG00000249242	ENSG00000184402
ENSG00000155115	ENSG00000198795
ENSG00000123119	ENSG00000168411
ENSG00000142669	ENSG00000152977
ENSG00000079819	ENSG00000167962
ENSG00000120860	ENSG00000198795
ENSG00000215039	ENSG00000065000
ENSG00000170017	ENSG00000111011
ENSG00000079819	ENSG00000101365
ENSG00000079819	ENSG00000141027
ENSG00000165757	ENSG00000156299
ENSG00000147526	ENSG00000156299
ENSG00000170340	ENSG00000152977
ENSG00000143252	ENSG00000198795
ENSG00000149357	ENSG00000138606
ENSG00000084073	ENSG00000135124
ENSG00000123119	ENSG00000118900
ENSG00000197982	ENSG00000139546
ENSG00000225791	ENSG00000198795
ENSG00000249242	ENSG00000158623
ENSG00000255248	ENSG00000101474
ENSG00000010270	ENSG00000070501
ENSG00000116489	ENSG00000136141
ENSG00000143183	ENSG00000198795
ENSG00000197894	ENSG00000198795
ENSG00000115350	ENSG00000006468
ENSG00000249242	ENSG00000123737
ENSG00000165633	ENSG00000198795
ENSG00000115306	ENSG00000156299
ENSG00000228474	ENSG00000003393
ENSG00000123119	ENSG00000170471
ENSG00000249242	ENSG00000158805
ENSG00000174021	ENSG00000072786
ENSG00000197448	ENSG00000120071
ENSG00000154447	ENSG00000092148
ENSG00000249242	ENSG00000105486
ENSG00000138650	ENSG00000169683
ENSG00000170017	ENSG00000100647
ENSG00000047579	ENSG00000156299
ENSG00000154380	ENSG00000152977
ENSG00000170017	ENSG00000071243
ENSG00000123119	ENSG00000147140
ENSG00000172428	ENSG00000152977
ENSG00000112304	ENSG00000156299
ENSG00000075142	ENSG00000135124
ENSG00000249242	ENSG00000171649
ENSG00000170017	ENSG00000158604
ENSG00000170017	ENSG00000170836
ENSG00000156110	ENSG00000198795
ENSG00000122378	ENSG00000102103
ENSG00000128849	ENSG00000149639
ENSG00000183576	ENSG00000198795
ENSG00000249242	ENSG00000197694
ENSG00000123119	ENSG00000213024
ENSG00000170017	ENSG00000137770
ENSG00000099308	ENSG00000198646
ENSG00000106400	ENSG00000198795
ENSG00000148450	ENSG00000198795
ENSG00000163634	ENSG00000156299
ENSG00000170017	ENSG00000171862
ENSG00000152818	ENSG00000139546
ENSG00000242616	ENSG00000139546
ENSG00000249242	ENSG00000152443
ENSG00000170017	ENSG00000198795
ENSG00000123119	ENSG00000104866
ENSG00000215039	ENSG00000101181
ENSG00000183291	ENSG00000152977
ENSG00000134243	ENSG00000198795
ENSG00000188010	ENSG00000070501
ENSG00000253982	ENSG00000198795
ENSG00000170017	ENSG00000032219
ENSG00000215039	ENSG00000105325
ENSG00000123119	ENSG00000100426
ENSG00000215039	ENSG00000175198
ENSG00000074201	ENSG00000198795
ENSG00000123119	ENSG00000141446
ENSG00000113657	ENSG00000072786
ENSG00000170017	ENSG00000095059
ENSG00000169976	ENSG00000139546
ENSG00000249242	ENSG00000136891
ENSG00000130340	ENSG00000149639
ENSG00000186132	ENSG00000070501
ENSG00000142669	ENSG00000135124
ENSG00000215039	ENSG00000076650
ENSG00000170632	ENSG00000139546
ENSG00000249242	ENSG00000108604
ENSG00000154447	ENSG00000112763
ENSG00000084073	ENSG00000152977
ENSG00000255135	ENSG00000198795
ENSG00000170017	ENSG00000241878
ENSG00000205707	ENSG00000198795
ENSG00000170017	ENSG00000138668
ENSG00000249242	ENSG00000254470
ENSG00000117305	ENSG00000198795
ENSG00000122378	ENSG00000075413
ENSG00000079819	ENSG00000141551
ENSG00000249242	ENSG00000122566
ENSG00000249242	ENSG00000170234
ENSG00000079819	ENSG00000149657
ENSG00000213064	ENSG00000140455
ENSG00000134248	ENSG00000070501
ENSG00000170017	ENSG00000172765
ENSG00000170275	ENSG00000072786
ENSG00000197448	ENSG00000105221
ENSG00000249242	ENSG00000177981
ENSG00000138363	ENSG00000239569
ENSG00000170017	ENSG00000180901
ENSG00000189077	ENSG00000139546
ENSG00000170017	ENSG00000164305
ENSG00000154447	ENSG00000022840
ENSG00000163634	ENSG00000070501
ENSG00000123119	ENSG00000130734
ENSG00000119729	ENSG00000152977
ENSG00000249242	ENSG00000169375
ENSG00000123119	ENSG00000111711
ENSG00000168894	ENSG00000070501
ENSG00000170017	ENSG00000043355
ENSG00000214194	ENSG00000070501
ENSG00000138650	ENSG00000162302
ENSG00000114850	ENSG00000135124
ENSG00000188010	ENSG00000156299
ENSG00000249242	ENSG00000172594
ENSG00000225921	ENSG00000198795
ENSG00000079819	ENSG00000186184
ENSG00000215039	ENSG00000104980
ENSG00000249242	ENSG00000213676
ENSG00000144566	ENSG00000198795
ENSG00000123119	ENSG00000155393
ENSG00000169964	ENSG00000135124
ENSG00000170017	ENSG00000197111
ENSG00000123119	ENSG00000136152
ENSG00000123119	ENSG00000198646
ENSG00000123119	ENSG00000119402
ENSG00000215039	ENSG00000078687
ENSG00000168461	ENSG00000198795
ENSG00000147526	ENSG00000128191
ENSG00000249242	ENSG00000110066
ENSG00000249242	ENSG00000147894
ENSG00000123119	ENSG00000088247
ENSG00000122378	ENSG00000083814
ENSG00000162734	ENSG00000152977
ENSG00000147592	ENSG00000198795
ENSG00000166337	ENSG00000139546
ENSG00000164919	ENSG00000156299
ENSG00000133835	ENSG00000135124
ENSG00000169499	ENSG00000101365
ENSG00000215039	ENSG00000139546
ENSG00000120705	ENSG00000198795
ENSG00000204370	ENSG00000135124
ENSG00000115520	ENSG00000135124
ENSG00000119328	ENSG00000156026
ENSG00000169964	ENSG00000152977
ENSG00000249242	ENSG00000183397
ENSG00000249242	ENSG00000136504
ENSG00000114209	ENSG00000139546
ENSG00000079819	ENSG00000095059
ENSG00000171530	ENSG00000198795
ENSG00000249242	ENSG00000205189
ENSG00000131508	ENSG00000135124
ENSG00000154447	ENSG00000145833
ENSG00000079819	ENSG00000167967
ENSG00000112851	ENSG00000072786
ENSG00000108100	ENSG00000139620
ENSG00000116489	ENSG00000070501
ENSG00000197448	ENSG00000138606
ENSG00000249242	ENSG00000130559
ENSG00000197568	ENSG00000135124
ENSG00000113845	ENSG00000139546
ENSG00000079819	ENSG00000100888
ENSG00000249242	ENSG00000136100
ENSG00000131236	ENSG00000072786
ENSG00000159658	ENSG00000152977
ENSG00000249242	ENSG00000106772
ENSG00000041880	ENSG00000135124
ENSG00000163964	ENSG00000113240
ENSG00000123119	ENSG00000205250
ENSG00000152332	ENSG00000152977
ENSG00000131495	ENSG00000135124
ENSG00000272325	ENSG00000135124
ENSG00000146433	ENSG00000099889
ENSG00000154447	ENSG00000113719
ENSG00000134809	ENSG00000198795
ENSG00000115350	ENSG00000156299
ENSG00000138650	ENSG00000179091
ENSG00000123119	ENSG00000099956
ENSG00000249242	ENSG00000164684
ENSG00000249242	ENSG00000100316
ENSG00000185187	ENSG00000198795
ENSG00000123213	ENSG00000135124
ENSG00000166272	ENSG00000198795
ENSG00000138650	ENSG00000088256
ENSG00000160049	ENSG00000139546
ENSG00000123119	ENSG00000101474
ENSG00000079819	ENSG00000171862
ENSG00000170017	ENSG00000108578
ENSG00000170017	ENSG00000065970
ENSG00000249242	ENSG00000123444
ENSG00000119729	ENSG00000135124
ENSG00000123119	ENSG00000126746
ENSG00000002549	ENSG00000072786
ENSG00000196975	ENSG00000152977
ENSG00000123119	ENSG00000101138
ENSG00000162735	ENSG00000135124
ENSG00000173915	ENSG00000135124
ENSG00000164096	ENSG00000198795
ENSG00000170017	ENSG00000171291
ENSG00000249242	ENSG00000139651
ENSG00000112977	ENSG00000135124
ENSG00000166340	ENSG00000198795
ENSG00000100605	ENSG00000180901
ENSG00000215039	ENSG00000125651
ENSG00000148948	ENSG00000135124
ENSG00000171530	ENSG00000070501
ENSG00000170017	ENSG00000214367
ENSG00000079819	ENSG00000101474
ENSG00000215039	ENSG00000167674
ENSG00000114902	ENSG00000239569
ENSG00000147526	ENSG00000198795
ENSG00000163820	ENSG00000198795
ENSG00000123119	ENSG00000101413
ENSG00000164039	ENSG00000198795
ENSG00000120742	ENSG00000198795
ENSG00000116489	ENSG00000198795
ENSG00000123119	ENSG00000100731
ENSG00000205220	ENSG00000198795
ENSG00000162704	ENSG00000198795
ENSG00000148498	ENSG00000140455
ENSG00000170017	ENSG00000103264
ENSG00000215039	ENSG00000089154
ENSG00000123119	ENSG00000160199
ENSG00000163138	ENSG00000135124
ENSG00000116459	ENSG00000138606
ENSG00000109576	ENSG00000130779
ENSG00000164106	ENSG00000198795
ENSG00000109576	ENSG00000170836
ENSG00000156052	ENSG00000135124
ENSG00000081377	ENSG00000198795
ENSG00000123119	ENSG00000170836
ENSG00000013288	ENSG00000156299
ENSG00000079819	ENSG00000099956
ENSG00000170275	ENSG00000152977
ENSG00000133983	ENSG00000198795
ENSG00000174307	ENSG00000152977
ENSG00000170017	ENSG00000019995
ENSG00000115306	ENSG00000198795
ENSG00000249242	ENSG00000170873
ENSG00000249242	ENSG00000153066
ENSG00000140937	ENSG00000198795
ENSG00000122378	ENSG00000075856
ENSG00000123119	ENSG00000167967
ENSG00000149357	ENSG00000139546
ENSG00000249242	ENSG00000177932
ENSG00000123119	ENSG00000111615
ENSG00000215039	ENSG00000140553
ENSG00000124380	ENSG00000135124
ENSG00000170017	ENSG00000053254
ENSG00000109576	ENSG00000167967
ENSG00000119878	ENSG00000198795
ENSG00000249242	ENSG00000126214
ENSG00000169499	ENSG00000019995
ENSG00000215039	ENSG00000103126
ENSG00000164713	ENSG00000198795
ENSG00000119729	ENSG00000072786
ENSG00000170017	ENSG00000141446
ENSG00000170017	ENSG00000113300
ENSG00000123119	ENSG00000188785
ENSG00000160049	ENSG00000152977
ENSG00000249242	ENSG00000213995
ENSG00000215039	ENSG00000188895
ENSG00000066027	ENSG00000198795
ENSG00000122378	ENSG00000092201
ENSG00000079819	ENSG00000178188
ENSG00000197448	ENSG00000196361
ENSG00000146433	ENSG00000135124
ENSG00000170017	ENSG00000042429
ENSG00000170017	ENSG00000072501
ENSG00000164741	ENSG00000198795
ENSG00000079819	ENSG00000119402
ENSG00000079819	ENSG00000169683
ENSG00000249242	ENSG00000212719
ENSG00000196975	ENSG00000072786
ENSG00000116478	ENSG00000198795
ENSG00000147586	ENSG00000198795
ENSG00000124380	ENSG00000152977
ENSG00000168894	ENSG00000198795
ENSG00000079819	ENSG00000102977
ENSG00000170017	ENSG00000150401
ENSG00000123119	ENSG00000125149
ENSG00000044115	ENSG00000072786
ENSG00000170017	ENSG00000155545
ENSG00000066583	ENSG00000072786
ENSG00000123119	ENSG00000152464
ENSG00000170017	ENSG00000177733
ENSG00000066583	ENSG00000139546
ENSG00000225921	ENSG00000070501
ENSG00000110315	ENSG00000198795
ENSG00000079819	ENSG00000181666
ENSG00000144566	ENSG00000070501
ENSG00000119471	ENSG00000198795
ENSG00000134970	ENSG00000198795
ENSG00000249242	ENSG00000112039
ENSG00000249242	ENSG00000135486
ENSG00000249242	ENSG00000168781
ENSG00000123119	ENSG00000100647
ENSG00000249242	ENSG00000101079
ENSG00000079308	ENSG00000152977
ENSG00000138650	ENSG00000101365
ENSG00000169964	ENSG00000139546
ENSG00000079819	ENSG00000185158
ENSG00000155957	ENSG00000198795
ENSG00000187735	ENSG00000198795
ENSG00000164054	ENSG00000152977
ENSG00000214174	ENSG00000156299
ENSG00000144847	ENSG00000198795
ENSG00000170017	ENSG00000257923
ENSG00000079819	ENSG00000103275
ENSG00000249242	ENSG00000205476
ENSG00000149932	ENSG00000198795
ENSG00000249242	ENSG00000126217
ENSG00000170017	ENSG00000099204
ENSG00000170017	ENSG00000150776
ENSG00000205707	ENSG00000156299
ENSG00000215039	ENSG00000130706
ENSG00000163697	ENSG00000198795
ENSG00000249242	ENSG00000107742
ENSG00000123119	ENSG00000101161
ENSG00000249242	ENSG00000102606
ENSG00000113296	ENSG00000198795
ENSG00000071082	ENSG00000152977
ENSG00000159658	ENSG00000072786
ENSG00000249242	ENSG00000137656
ENSG00000123119	ENSG00000124444
ENSG00000170017	ENSG00000118518
ENSG00000213064	ENSG00000152977
ENSG00000113845	ENSG00000152977
ENSG00000255248	ENSG00000100647
ENSG00000162976	ENSG00000072786
ENSG00000025796	ENSG00000135124
ENSG00000170017	ENSG00000100353
ENSG00000174021	ENSG00000152977
ENSG00000158828	ENSG00000006468
ENSG00000120306	ENSG00000198795
ENSG00000249242	ENSG00000096063
ENSG00000163382	ENSG00000135124
ENSG00000170017	ENSG00000105968
ENSG00000117174	ENSG00000139546
ENSG00000170017	ENSG00000172262
ENSG00000170017	ENSG00000006468
ENSG00000249242	ENSG00000138617
ENSG00000197448	ENSG00000099889
ENSG00000170017	ENSG00000047346
ENSG00000124767	ENSG00000135124
ENSG00000249242	ENSG00000112983
ENSG00000122378	ENSG00000110171
ENSG00000170017	ENSG00000129460
ENSG00000249242	ENSG00000177302
ENSG00000185043	ENSG00000198795
ENSG00000123119	ENSG00000134900
ENSG00000188010	ENSG00000198795
ENSG00000158985	ENSG00000135124
ENSG00000249242	ENSG00000178971
ENSG00000065802	ENSG00000152977
ENSG00000118257	ENSG00000149639
ENSG00000079819	ENSG00000004866
ENSG00000170017	ENSG00000050405
ENSG00000249242	ENSG00000141699
ENSG00000249242	ENSG00000135124
ENSG00000134996	ENSG00000156299
ENSG00000079819	ENSG00000140995
ENSG00000142669	ENSG00000139546
ENSG00000123119	ENSG00000196387
ENSG00000123119	ENSG00000076924
ENSG00000123119	ENSG00000196152
ENSG00000249242	ENSG00000166965
ENSG00000122378	ENSG00000125875
ENSG00000079819	ENSG00000178761
ENSG00000138650	ENSG00000167967
ENSG00000170017	ENSG00000101474
ENSG00000213064	ENSG00000149639
ENSG00000170017	ENSG00000100811
ENSG00000067113	ENSG00000198795
ENSG00000170017	ENSG00000102974
ENSG00000249242	ENSG00000007545
ENSG00000249242	ENSG00000140829
ENSG00000170017	ENSG00000109606
ENSG00000104067	ENSG00000149639
ENSG00000249242	ENSG00000256771
ENSG00000079819	ENSG00000103264
ENSG00000249242	ENSG00000259456
ENSG00000177556	ENSG00000139546
ENSG00000170017	ENSG00000099956
ENSG00000152332	ENSG00000003393
ENSG00000197982	ENSG00000152977
ENSG00000255529	ENSG00000198795
ENSG00000170017	ENSG00000239569
ENSG00000109576	ENSG00000062370
ENSG00000115233	ENSG00000070501
ENSG00000099308	ENSG00000088356
ENSG00000249242	ENSG00000151729
ENSG00000123119	ENSG00000123066
ENSG00000123119	ENSG00000196150
ENSG00000123119	ENSG00000134283
ENSG00000249242	ENSG00000164180
ENSG00000010270	ENSG00000198795
ENSG00000100605	ENSG00000198795
ENSG00000182165	ENSG00000198795
ENSG00000123119	ENSG00000132382
ENSG00000215039	ENSG00000149639
ENSG00000170017	ENSG00000138750
ENSG00000099308	ENSG00000197114
ENSG00000090487	ENSG00000198795
ENSG00000249242	ENSG00000198105
ENSG00000170017	ENSG00000120137
ENSG00000134809	ENSG00000156299
ENSG00000170017	ENSG00000137310
ENSG00000249242	ENSG00000119397
ENSG00000122378	ENSG00000187555
ENSG00000154447	ENSG00000005483
ENSG00000079819	ENSG00000169727
ENSG00000123119	ENSG00000167962
ENSG00000112977	ENSG00000138606
ENSG00000170017	ENSG00000141127
ENSG00000132963	ENSG00000198795
ENSG00000134222	ENSG00000152977
ENSG00000215039	ENSG00000153066
ENSG00000111229	ENSG00000156299
ENSG00000111237	ENSG00000135124
ENSG00000147526	ENSG00000156026
ENSG00000122378	ENSG00000088247
ENSG00000170017	ENSG00000145833
ENSG00000170017	ENSG00000164631
ENSG00000197448	ENSG00000182685
ENSG00000079819	ENSG00000092201
ENSG00000115350	ENSG00000139546
ENSG00000205981	ENSG00000070501
ENSG00000154059	ENSG00000156299
ENSG00000134243	ENSG00000113240
ENSG00000099256	ENSG00000198795
ENSG00000124380	ENSG00000156299
ENSG00000079819	ENSG00000171763
ENSG00000170017	ENSG00000152977
ENSG00000197448	ENSG00000130816
ENSG00000249242	ENSG00000130734
ENSG00000122378	ENSG00000176953
ENSG00000183291	ENSG00000198795
ENSG00000123119	ENSG00000196363
ENSG00000107341	ENSG00000053254
ENSG00000114023	ENSG00000135124
ENSG00000155115	ENSG00000135124
ENSG00000181061	ENSG00000070501
ENSG00000123119	ENSG00000089280
ENSG00000114353	ENSG00000152977
ENSG00000249242	ENSG00000120254
ENSG00000117298	ENSG00000113240
ENSG00000170017	ENSG00000197343
ENSG00000215039	ENSG00000169057
ENSG00000079819	ENSG00000175470
ENSG00000084073	ENSG00000198795
ENSG00000162961	ENSG00000070501
ENSG00000120658	ENSG00000156299
ENSG00000178057	ENSG00000135124
ENSG00000170017	ENSG00000197579
ENSG00000143183	ENSG00000135124
ENSG00000197894	ENSG00000135124
ENSG00000109576	ENSG00000171467
ENSG00000249242	ENSG00000178188
ENSG00000071082	ENSG00000156299
ENSG00000213064	ENSG00000156299
ENSG00000117305	ENSG00000152977
ENSG00000114353	ENSG00000135124
ENSG00000112977	ENSG00000171988
ENSG00000249242	ENSG00000186532
ENSG00000249242	ENSG00000205683
ENSG00000074201	ENSG00000135124
ENSG00000112977	ENSG00000053254
ENSG00000169976	ENSG00000070501
ENSG00000071127	ENSG00000072786
ENSG00000174574	ENSG00000135124
ENSG00000129187	ENSG00000053254
ENSG00000249242	ENSG00000133606
ENSG00000143252	ENSG00000152977
ENSG00000122378	ENSG00000099956
ENSG00000123119	ENSG00000089902
ENSG00000205707	ENSG00000135124
ENSG00000123119	ENSG00000081386
ENSG00000170017	ENSG00000189180
ENSG00000079819	ENSG00000119392
ENSG00000123119	ENSG00000100129
ENSG00000100605	ENSG00000099889
ENSG00000170017	ENSG00000204977
ENSG00000067113	ENSG00000072786
ENSG00000183580	ENSG00000149639
ENSG00000079819	ENSG00000153066
ENSG00000123119	ENSG00000187522
ENSG00000205981	ENSG00000239569
ENSG00000169499	ENSG00000130713
ENSG00000143183	ENSG00000152977
ENSG00000170632	ENSG00000070501
ENSG00000123119	ENSG00000100316
ENSG00000134248	ENSG00000003393
ENSG00000164088	ENSG00000152977
ENSG00000154447	ENSG00000101365
ENSG00000104671	ENSG00000156299
ENSG00000158828	ENSG00000135124
ENSG00000249242	ENSG00000153291
ENSG00000155189	ENSG00000198795
ENSG00000075142	ENSG00000198795
ENSG00000122378	ENSG00000107819
ENSG00000123119	ENSG00000111596
ENSG00000154447	ENSG00000141219
ENSG00000170017	ENSG00000236287
ENSG00000170017	ENSG00000170242
ENSG00000249242	ENSG00000168944
ENSG00000154447	ENSG00000197111
ENSG00000079819	ENSG00000132664
ENSG00000170017	ENSG00000100982
ENSG00000134107	ENSG00000156299
ENSG00000179403	ENSG00000152977
ENSG00000123119	ENSG00000128908
ENSG00000123119	ENSG00000158545
ENSG00000170017	ENSG00000130706
ENSG00000170017	ENSG00000130935
ENSG00000170017	ENSG00000261526
ENSG00000123119	ENSG00000124459
ENSG00000135069	ENSG00000198795
ENSG00000147526	ENSG00000099889
ENSG00000116898	ENSG00000139546
ENSG00000144566	ENSG00000135124
ENSG00000111328	ENSG00000198795
ENSG00000170017	ENSG00000174197
ENSG00000179295	ENSG00000198795
ENSG00000122378	ENSG00000147140
ENSG00000123119	ENSG00000189091
ENSG00000079819	ENSG00000140553
ENSG00000163697	ENSG00000072786
ENSG00000140905	ENSG00000198795
ENSG00000249242	ENSG00000005206
ENSG00000115468	ENSG00000152977
ENSG00000249242	ENSG00000151657
ENSG00000159658	ENSG00000198795
ENSG00000170017	ENSG00000152795
ENSG00000249242	ENSG00000179859
ENSG00000149084	ENSG00000198795
ENSG00000183580	ENSG00000113240
ENSG00000079819	ENSG00000103126
ENSG00000170017	ENSG00000146247
ENSG00000120658	ENSG00000179889
ENSG00000133835	ENSG00000198795
ENSG00000122378	ENSG00000196123
ENSG00000106355	ENSG00000070501
ENSG00000164741	ENSG00000139546
ENSG00000154447	ENSG00000130803
ENSG00000249242	ENSG00000136381
ENSG00000104671	ENSG00000070501
ENSG00000170017	ENSG00000095787
ENSG00000249242	ENSG00000188321
ENSG00000170017	ENSG00000136986
ENSG00000136603	ENSG00000139546
ENSG00000060762	ENSG00000198795
ENSG00000249242	ENSG00000187953
ENSG00000170017	ENSG00000137656
ENSG00000215039	ENSG00000101474
ENSG00000165633	ENSG00000149639
ENSG00000146433	ENSG00000006468
ENSG00000108100	ENSG00000053254
ENSG00000123119	ENSG00000095485
ENSG00000170017	ENSG00000092201
ENSG00000123119	ENSG00000169951
ENSG00000066583	ENSG00000198795
ENSG00000136603	ENSG00000076641
ENSG00000170634	ENSG00000070501
ENSG00000249242	ENSG00000147140
ENSG00000079819	ENSG00000176619
ENSG00000170017	ENSG00000171763
ENSG00000231721	ENSG00000070501
ENSG00000197448	ENSG00000182325
ENSG00000153113	ENSG00000072786
ENSG00000079819	ENSG00000107745
ENSG00000249242	ENSG00000168612
ENSG00000168894	ENSG00000139546
ENSG00000114850	ENSG00000198795
ENSG00000116478	ENSG00000072786
ENSG00000196975	ENSG00000198795
ENSG00000114902	ENSG00000135124
ENSG00000242616	ENSG00000156299
ENSG00000249242	ENSG00000111110
ENSG00000170017	ENSG00000086102
ENSG00000152818	ENSG00000156299
ENSG00000122378	ENSG00000156299
ENSG00000163634	ENSG00000139546
ENSG00000249242	ENSG00000103264
ENSG00000116459	ENSG00000156299
ENSG00000185187	ENSG00000135124
ENSG00000123119	ENSG00000075413
ENSG00000205981	ENSG00000156299
ENSG00000166272	ENSG00000135124
ENSG00000255248	ENSG00000089280
ENSG00000122378	ENSG00000019995
ENSG00000104728	ENSG00000149639
ENSG00000119729	ENSG00000198795
ENSG00000120451	ENSG00000198795
ENSG00000164713	ENSG00000139546
ENSG00000123119	ENSG00000102710
ENSG00000249242	ENSG00000140995
ENSG00000197448	ENSG00000154832
ENSG00000164096	ENSG00000135124
ENSG00000170017	ENSG00000149639
ENSG00000170017	ENSG00000168813
ENSG00000214253	ENSG00000135124
ENSG00000149357	ENSG00000198795
ENSG00000122378	ENSG00000053254
ENSG00000138642	ENSG00000113240
ENSG00000114902	ENSG00000152977
ENSG00000122378	ENSG00000005007
ENSG00000079819	ENSG00000140948
ENSG00000169085	ENSG00000111596
ENSG00000075618	ENSG00000135124
ENSG00000171202	ENSG00000135124
ENSG00000079819	ENSG00000188895
ENSG00000144566	ENSG00000152977
ENSG00000170017	ENSG00000147601
ENSG00000163820	ENSG00000072786
ENSG00000170017	ENSG00000114098
ENSG00000249242	ENSG00000141446
ENSG00000170017	ENSG00000140350
ENSG00000127922	ENSG00000070501
ENSG00000249242	ENSG00000112624
ENSG00000215039	ENSG00000169683
ENSG00000154447	ENSG00000100445
ENSG00000123119	ENSG00000102103
ENSG00000249242	ENSG00000172661
ENSG00000081377	ENSG00000139546
ENSG00000203778	ENSG00000198795
ENSG00000170017	ENSG00000158669
ENSG00000070614	ENSG00000149639
ENSG00000163344	ENSG00000135124
ENSG00000170017	ENSG00000092148
ENSG00000198142	ENSG00000152977
ENSG00000170017	ENSG00000196361
ENSG00000160049	ENSG00000198795
ENSG00000170385	ENSG00000152977
ENSG00000166272	ENSG00000139546
ENSG00000249242	ENSG00000196741
ENSG00000170017	ENSG00000104824
ENSG00000197448	ENSG00000130726
ENSG00000065154	ENSG00000135124
ENSG00000170390	ENSG00000099889
ENSG00000154059	ENSG00000198795
ENSG00000123119	ENSG00000124160
ENSG00000249242	ENSG00000141569
ENSG00000255112	ENSG00000156299
ENSG00000170017	ENSG00000089916
ENSG00000173163	ENSG00000139546
ENSG00000119878	ENSG00000135124
ENSG00000154447	ENSG00000120137
ENSG00000123119	ENSG00000130713
ENSG00000154447	ENSG00000106682
ENSG00000157911	ENSG00000138606
ENSG00000215039	ENSG00000100726
ENSG00000123119	ENSG00000103326
ENSG00000124380	ENSG00000198795
ENSG00000154447	ENSG00000049618
ENSG00000168894	ENSG00000152977
ENSG00000151893	ENSG00000099889
ENSG00000170017	ENSG00000089335
ENSG00000183283	ENSG00000198795
ENSG00000255248	ENSG00000092201
ENSG00000170017	ENSG00000120616
ENSG00000170017	ENSG00000171316
ENSG00000170348	ENSG00000198795
ENSG00000215039	ENSG00000149657
ENSG00000204356	ENSG00000139546
ENSG00000255248	ENSG00000213995
ENSG00000131508	ENSG00000006468
ENSG00000249242	ENSG00000182872
ENSG00000122378	ENSG00000173120
ENSG00000079819	ENSG00000152443
ENSG00000249242	ENSG00000171291
ENSG00000249242	ENSG00000196378
ENSG00000249242	ENSG00000120784
ENSG00000109576	ENSG00000135124
ENSG00000123119	ENSG00000130935
ENSG00000171202	ENSG00000139546
ENSG00000123119	ENSG00000130706
ENSG00000123119	ENSG00000185803
ENSG00000249242	ENSG00000165233
ENSG00000148672	ENSG00000099204
ENSG00000123119	ENSG00000185963
ENSG00000163344	ENSG00000139546
ENSG00000249242	ENSG00000172613
ENSG00000104067	ENSG00000198795
ENSG00000153048	ENSG00000156299
ENSG00000170017	ENSG00000066044
ENSG00000197448	ENSG00000196123
ENSG00000249242	ENSG00000137171
ENSG00000272325	ENSG00000006468
ENSG00000170017	ENSG00000164684
ENSG00000113845	ENSG00000198795
ENSG00000081377	ENSG00000135124
ENSG00000170017	ENSG00000188612
ENSG00000134202	ENSG00000152977
ENSG00000181467	ENSG00000156299
ENSG00000116898	ENSG00000135124
ENSG00000110917	ENSG00000149639
ENSG00000122378	ENSG00000197111
ENSG00000116489	ENSG00000152977
ENSG00000162735	ENSG00000239569
ENSG00000122378	ENSG00000168066
ENSG00000249242	ENSG00000127980
ENSG00000162704	ENSG00000152977
ENSG00000215039	ENSG00000198795
ENSG00000170017	ENSG00000170234
ENSG00000123119	ENSG00000198887
ENSG00000123119	ENSG00000125651
ENSG00000215039	ENSG00000025770
ENSG00000249242	ENSG00000198182
ENSG00000123119	ENSG00000141499
ENSG00000092820	ENSG00000135124
ENSG00000152332	ENSG00000070501
ENSG00000123119	ENSG00000187555
ENSG00000250317	ENSG00000198795
ENSG00000104671	ENSG00000198795
ENSG00000154447	ENSG00000101474
ENSG00000122378	ENSG00000180901
ENSG00000170017	ENSG00000110066
ENSG00000119929	ENSG00000198795
ENSG00000170017	ENSG00000177200
ENSG00000123119	ENSG00000187742
ENSG00000215039	ENSG00000167967
ENSG00000079819	ENSG00000189091
ENSG00000136603	ENSG00000135124
ENSG00000249242	ENSG00000197111
ENSG00000066583	ENSG00000070501
ENSG00000168894	ENSG00000135124
ENSG00000114902	ENSG00000139546
ENSG00000123119	ENSG00000213762
ENSG00000131508	ENSG00000239569
ENSG00000163634	ENSG00000135124
ENSG00000119878	ENSG00000152977
ENSG00000079819	ENSG00000184402
ENSG00000249242	ENSG00000101365
ENSG00000249242	ENSG00000113761
ENSG00000170017	ENSG00000089280
ENSG00000158122	ENSG00000198795
ENSG00000249242	ENSG00000182087
ENSG00000154447	ENSG00000102974
ENSG00000170017	ENSG00000152443
ENSG00000103449	ENSG00000149639
ENSG00000123119	ENSG00000157349
ENSG00000169976	ENSG00000198795
ENSG00000170017	ENSG00000189079
ENSG00000123119	ENSG00000088298
ENSG00000121900	ENSG00000139546
ENSG00000117298	ENSG00000072786
ENSG00000114353	ENSG00000072786
ENSG00000198130	ENSG00000198795
ENSG00000109576	ENSG00000141098
ENSG00000113657	ENSG00000198795
ENSG00000172667	ENSG00000239569
ENSG00000213064	ENSG00000168071
ENSG00000081377	ENSG00000149639
ENSG00000154447	ENSG00000155545
ENSG00000249242	ENSG00000130584
ENSG00000249242	ENSG00000137770
ENSG00000123119	ENSG00000083093
ENSG00000122378	ENSG00000100888
ENSG00000079819	ENSG00000149930
ENSG00000170017	ENSG00000163714
ENSG00000115350	ENSG00000152977
ENSG00000117174	ENSG00000006468
ENSG00000163466	ENSG00000135124
ENSG00000183828	ENSG00000156299
ENSG00000025796	ENSG00000198795
ENSG00000215039	ENSG00000167962
ENSG00000170017	ENSG00000076641
ENSG00000154447	ENSG00000147140
ENSG00000215039	ENSG00000101365
ENSG00000079819	ENSG00000065000
ENSG00000158828	ENSG00000139546
ENSG00000215039	ENSG00000069998
ENSG00000123119	ENSG00000101442
ENSG00000249242	ENSG00000095059
ENSG00000249242	ENSG00000175634
ENSG00000170017	ENSG00000139546
ENSG00000249242	ENSG00000167967
ENSG00000242616	ENSG00000198795
ENSG00000170017	ENSG00000072786
ENSG00000106400	ENSG00000139546
ENSG00000170017	ENSG00000187257
ENSG00000149357	ENSG00000053254
ENSG00000170017	ENSG00000087269
ENSG00000249242	ENSG00000100083
ENSG00000249242	ENSG00000100726
ENSG00000249242	ENSG00000221988
ENSG00000079819	ENSG00000177200
ENSG00000079819	ENSG00000076650
ENSG00000162627	ENSG00000152977
ENSG00000122378	ENSG00000101161
ENSG00000107897	ENSG00000198795
ENSG00000109576	ENSG00000174197
ENSG00000119729	ENSG00000156299
ENSG00000170017	ENSG00000178691
ENSG00000170017	ENSG00000184402
ENSG00000053371	ENSG00000198795
ENSG00000170017	ENSG00000099889
ENSG00000183291	ENSG00000070501
ENSG00000116478	ENSG00000149639
ENSG00000143252	ENSG00000139546
ENSG00000123119	ENSG00000104129
ENSG00000123119	ENSG00000196305
ENSG00000065802	ENSG00000198795
ENSG00000157911	ENSG00000135124
ENSG00000215039	ENSG00000100722
ENSG00000123119	ENSG00000100603
ENSG00000122378	ENSG00000186184
ENSG00000154447	ENSG00000136816
ENSG00000112245	ENSG00000070501
ENSG00000119729	ENSG00000099204
ENSG00000249242	ENSG00000198556
ENSG00000170017	ENSG00000168246
ENSG00000123119	ENSG00000077514
ENSG00000134153	ENSG00000198795
ENSG00000122378	ENSG00000100726
ENSG00000079819	ENSG00000101181
ENSG00000135211	ENSG00000135124
ENSG00000170017	ENSG00000109445
ENSG00000197982	ENSG00000198795
ENSG00000178057	ENSG00000139546
ENSG00000164054	ENSG00000043355ENSG00000080603	ENSG00000131171
ENSG00000152977	ENSG00000112851
ENSG00000006468	ENSG00000119929
ENSG00000132153	ENSG00000154447
ENSG00000135124	ENSG00000185880
ENSG00000122085	ENSG00000197448
ENSG00000187257	ENSG00000255248
ENSG00000102977	ENSG00000131171
ENSG00000130414	ENSG00000131171
ENSG00000070047	ENSG00000131171
ENSG00000132485	ENSG00000079819
ENSG00000076924	ENSG00000131171
ENSG00000181555	ENSG00000123119
ENSG00000152977	ENSG00000140905
ENSG00000120254	ENSG00000123119
ENSG00000137171	ENSG00000131171
ENSG00000077097	ENSG00000079819
ENSG00000139546	ENSG00000153406
ENSG00000114650	ENSG00000215039
ENSG00000171988	ENSG00000185825
ENSG00000156026	ENSG00000166171
ENSG00000239569	ENSG00000090013
ENSG00000152977	ENSG00000111961
ENSG00000198795	ENSG00000167315
ENSG00000163877	ENSG00000131171
ENSG00000152977	ENSG00000106400
ENSG00000154781	ENSG00000215039
ENSG00000204178	ENSG00000079819
ENSG00000135776	ENSG00000255248
ENSG00000106080	ENSG00000123119
ENSG00000087269	ENSG00000249242
ENSG00000239569	ENSG00000157823
ENSG00000115275	ENSG00000131171
ENSG00000204231	ENSG00000131171
ENSG00000198795	ENSG00000185437
ENSG00000135775	ENSG00000255248
ENSG00000196363	ENSG00000099308
ENSG00000070501	ENSG00000103769
ENSG00000137200	ENSG00000131171
ENSG00000003393	ENSG00000149256
ENSG00000152977	ENSG00000099256
ENSG00000111596	ENSG00000099308
ENSG00000004975	ENSG00000131171
ENSG00000113240	ENSG00000153406
ENSG00000139546	ENSG00000214046
ENSG00000065000	ENSG00000099308
ENSG00000130734	ENSG00000131171
ENSG00000162236	ENSG00000131171
ENSG00000135124	ENSG00000078304
ENSG00000131375	ENSG00000170017
ENSG00000087269	ENSG00000154447
ENSG00000152977	ENSG00000133731
ENSG00000152977	ENSG00000242616
ENSG00000136271	ENSG00000100364
ENSG00000072786	ENSG00000101367
ENSG00000239569	ENSG00000099785
ENSG00000156983	ENSG00000123119
ENSG00000074964	ENSG00000069535
ENSG00000115216	ENSG00000154447
ENSG00000113240	ENSG00000215039
ENSG00000135124	ENSG00000125375
ENSG00000050820	ENSG00000131171
ENSG00000130764	ENSG00000131171
ENSG00000138050	ENSG00000170017
ENSG00000013375	ENSG00000123119
ENSG00000172009	ENSG00000131171
ENSG00000152977	ENSG00000175348
ENSG00000113240	ENSG00000152137
ENSG00000114648	ENSG00000123119
ENSG00000165138	ENSG00000157617
ENSG00000176953	ENSG00000100364
ENSG00000135945	ENSG00000079819
ENSG00000175573	ENSG00000131171
ENSG00000135124	ENSG00000184226
ENSG00000152977	ENSG00000129235
ENSG00000239569	ENSG00000124214
ENSG00000261526	ENSG00000131171
ENSG00000109685	ENSG00000079819
ENSG00000215908	ENSG00000011454
ENSG00000038532	ENSG00000131171
ENSG00000081721	ENSG00000170017
ENSG00000003393	ENSG00000205220
ENSG00000180098	ENSG00000123119
ENSG00000152977	ENSG00000100300
ENSG00000162231	ENSG00000131171
ENSG00000198795	ENSG00000022277
ENSG00000125651	ENSG00000099308
ENSG00000057019	ENSG00000123119
ENSG00000124789	ENSG00000123119
ENSG00000152977	ENSG00000215039
ENSG00000087269	ENSG00000120658
ENSG00000172046	ENSG00000131171
ENSG00000215908	ENSG00000131236
ENSG00000239569	ENSG00000100348
ENSG00000135124	ENSG00000141741
ENSG00000163788	ENSG00000079819
ENSG00000155545	ENSG00000131171
ENSG00000239569	ENSG00000156052
ENSG00000139613	ENSG00000131171
ENSG00000139546	ENSG00000166068
ENSG00000152977	ENSG00000176485
ENSG00000172262	ENSG00000079819
ENSG00000165233	ENSG00000131171
ENSG00000152977	ENSG00000214253
ENSG00000174151	ENSG00000123119
ENSG00000003393	ENSG00000141552
ENSG00000152977	ENSG00000119929
ENSG00000105325	ENSG00000131171
ENSG00000112763	ENSG00000123119
ENSG00000114098	ENSG00000122378
ENSG00000152977	ENSG00000066455
ENSG00000159761	ENSG00000100364
ENSG00000214753	ENSG00000215039
ENSG00000135945	ENSG00000152137
ENSG00000113240	ENSG00000133121
ENSG00000163882	ENSG00000131171
ENSG00000003393	ENSG00000127774
ENSG00000196363	ENSG00000215039
ENSG00000165671	ENSG00000131171
ENSG00000003393	ENSG00000128309
ENSG00000003393	ENSG00000205544
ENSG00000135124	ENSG00000188026
ENSG00000003393	ENSG00000145494
ENSG00000003393	ENSG00000267855
ENSG00000171720	ENSG00000131171
ENSG00000158545	ENSG00000131171
ENSG00000163870	ENSG00000131171
ENSG00000162419	ENSG00000123119
ENSG00000178188	ENSG00000131171
ENSG00000152977	ENSG00000214046
ENSG00000144028	ENSG00000123119
ENSG00000135124	ENSG00000198157
ENSG00000152977	ENSG00000164096
ENSG00000118689	ENSG00000131171
ENSG00000140995	ENSG00000131171
ENSG00000113719	ENSG00000131171
ENSG00000239569	ENSG00000157617
ENSG00000163939	ENSG00000123119
ENSG00000116213	ENSG00000079819
ENSG00000058453	ENSG00000249242
ENSG00000135124	ENSG00000141447
ENSG00000087269	ENSG00000152137
ENSG00000110274	ENSG00000131171
ENSG00000117682	ENSG00000133313
ENSG00000152977	ENSG00000124172
ENSG00000003393	ENSG00000260032
ENSG00000109736	ENSG00000131171
ENSG00000116698	ENSG00000131171
ENSG00000066136	ENSG00000079819
ENSG00000077097	ENSG00000154447
ENSG00000152977	ENSG00000103485
ENSG00000239569	ENSG00000128463
ENSG00000148337	ENSG00000255248
ENSG00000215908	ENSG00000159461
ENSG00000070501	ENSG00000205707
ENSG00000143373	ENSG00000131171
ENSG00000143748	ENSG00000249242
ENSG00000138081	ENSG00000123119
ENSG00000176444	ENSG00000131171
ENSG00000132153	ENSG00000079819
ENSG00000135124	ENSG00000125249
ENSG00000142751	ENSG00000123119
ENSG00000006468	ENSG00000100605
ENSG00000113240	ENSG00000104067
ENSG00000172732	ENSG00000131171
ENSG00000132781	ENSG00000170017
ENSG00000003393	ENSG00000149357
ENSG00000137817	ENSG00000131171
ENSG00000158864	ENSG00000131171
ENSG00000112062	ENSG00000131171
ENSG00000115216	ENSG00000079819
ENSG00000081721	ENSG00000131171
ENSG00000043355	ENSG00000100605
ENSG00000116213	ENSG00000215039
ENSG00000062485	ENSG00000131171
ENSG00000158941	ENSG00000131171
ENSG00000087269	ENSG00000079819
ENSG00000185000	ENSG00000131171
ENSG00000118242	ENSG00000123119
ENSG00000113240	ENSG00000165458
ENSG00000170234	ENSG00000079819
ENSG00000152977	ENSG00000136603
ENSG00000169683	ENSG00000131171
ENSG00000157800	ENSG00000123119
ENSG00000072786	ENSG00000240849
ENSG00000113240	ENSG00000165672
ENSG00000162302	ENSG00000131171
ENSG00000152977	ENSG00000185437
ENSG00000162613	ENSG00000123119
ENSG00000188976	ENSG00000131171
ENSG00000174151	ENSG00000249242
ENSG00000126107	ENSG00000131171
ENSG00000152977	ENSG00000205927
ENSG00000173653	ENSG00000131171
ENSG00000164896	ENSG00000131171
ENSG00000152977	ENSG00000147400
ENSG00000114098	ENSG00000112977
ENSG00000239569	ENSG00000159461
ENSG00000136271	ENSG00000099308
ENSG00000070501	ENSG00000081913
ENSG00000152977	ENSG00000109790
ENSG00000132182	ENSG00000131171
ENSG00000153922	ENSG00000123119
ENSG00000185049	ENSG00000131171
ENSG00000160050	ENSG00000249242
ENSG00000145191	ENSG00000131171
ENSG00000115211	ENSG00000079819
ENSG00000170265	ENSG00000123119
ENSG00000072786	ENSG00000102580
ENSG00000120137	ENSG00000079819
ENSG00000135124	ENSG00000131171
ENSG00000152977	ENSG00000064961
ENSG00000174231	ENSG00000099308
ENSG00000127554	ENSG00000131171
ENSG00000004487	ENSG00000079819
ENSG00000135945	ENSG00000249242
ENSG00000152977	ENSG00000157617
ENSG00000186184	ENSG00000131171
ENSG00000125450	ENSG00000157617
ENSG00000157933	ENSG00000164741
ENSG00000152977	ENSG00000135441
ENSG00000109685	ENSG00000249242
ENSG00000136631	ENSG00000079819
ENSG00000003393	ENSG00000124209
ENSG00000087269	ENSG00000123119
ENSG00000146676	ENSG00000123119
ENSG00000152977	ENSG00000153048
ENSG00000152977	ENSG00000066583
ENSG00000134186	ENSG00000170017
ENSG00000185619	ENSG00000122378
ENSG00000178950	ENSG00000079819
ENSG00000239569	ENSG00000103018
ENSG00000148843	ENSG00000131171
ENSG00000109685	ENSG00000154447
ENSG00000198795	ENSG00000064490
ENSG00000162298	ENSG00000131171
ENSG00000117682	ENSG00000132963
ENSG00000070501	ENSG00000124172
ENSG00000135776	ENSG00000170017
ENSG00000053254	ENSG00000100605
ENSG00000145833	ENSG00000079819
ENSG00000185485	ENSG00000249242
ENSG00000106346	ENSG00000099308
ENSG00000065029	ENSG00000131171
ENSG00000076650	ENSG00000131171
ENSG00000116213	ENSG00000099308
ENSG00000164048	ENSG00000249242
ENSG00000113240	ENSG00000164967
ENSG00000139546	ENSG00000130313
ENSG00000152977	ENSG00000205707
ENSG00000116213	ENSG00000123119
ENSG00000112739	ENSG00000123119
ENSG00000004866	ENSG00000215039
ENSG00000221988	ENSG00000197448
ENSG00000145041	ENSG00000131171
ENSG00000068745	ENSG00000170017
ENSG00000111676	ENSG00000131171
ENSG00000182685	ENSG00000183723
ENSG00000152977	ENSG00000100605
ENSG00000113240	ENSG00000164741
ENSG00000142330	ENSG00000131171
ENSG00000073111	ENSG00000249242
ENSG00000148343	ENSG00000215039
ENSG00000160094	ENSG00000131171
ENSG00000185219	ENSG00000131171
ENSG00000168827	ENSG00000131171
ENSG00000099381	ENSG00000099308
ENSG00000070501	ENSG00000101132
ENSG00000152977	ENSG00000157601
ENSG00000184897	ENSG00000123119
ENSG00000113240	ENSG00000100364
ENSG00000135124	ENSG00000182636
ENSG00000204227	ENSG00000131171
ENSG00000152977	ENSG00000160293
ENSG00000142751	ENSG00000079819
ENSG00000158773	ENSG00000079819
ENSG00000152977	ENSG00000136770
ENSG00000077044	ENSG00000170017
ENSG00000164190	ENSG00000123119
ENSG00000221988	ENSG00000122378
ENSG00000152977	ENSG00000129675
ENSG00000239569	ENSG00000132963
ENSG00000168395	ENSG00000131171
ENSG00000113719	ENSG00000215039
ENSG00000198795	ENSG00000198157
ENSG00000003393	ENSG00000130313
ENSG00000156983	ENSG00000131171
ENSG00000070501	ENSG00000101856
ENSG00000131375	ENSG00000249242
ENSG00000116062	ENSG00000249242
ENSG00000172046	ENSG00000079819
ENSG00000152977	ENSG00000124225
ENSG00000168887	ENSG00000249242
ENSG00000177733	ENSG00000123119
ENSG00000038382	ENSG00000123119
ENSG00000196363	ENSG00000131171
ENSG00000239569	ENSG00000122378
ENSG00000152977	ENSG00000156671
ENSG00000152977	ENSG00000253982
ENSG00000198795	ENSG00000101367
ENSG00000135124	ENSG00000197380
ENSG00000115275	ENSG00000123119
ENSG00000163719	ENSG00000249242
ENSG00000214753	ENSG00000131171
ENSG00000078808	ENSG00000154447
ENSG00000003393	ENSG00000224877
ENSG00000070501	ENSG00000122042
ENSG00000152977	ENSG00000109956
ENSG00000164631	ENSG00000123119
ENSG00000065000	ENSG00000131171
ENSG00000152977	ENSG00000136783
ENSG00000239569	ENSG00000197448
ENSG00000161013	ENSG00000131171
ENSG00000139546	ENSG00000132669
ENSG00000204256	ENSG00000122378
ENSG00000185219	ENSG00000249242
ENSG00000152977	ENSG00000133835
ENSG00000187257	ENSG00000099308
ENSG00000113719	ENSG00000079819
ENSG00000183020	ENSG00000131171
ENSG00000164151	ENSG00000123119
ENSG00000158773	ENSG00000122378
ENSG00000006468	ENSG00000006451
ENSG00000058600	ENSG00000131171
ENSG00000163125	ENSG00000131171
ENSG00000087269	ENSG00000106785
ENSG00000239569	ENSG00000125818
ENSG00000152977	ENSG00000152818
ENSG00000172046	ENSG00000215039
ENSG00000171720	ENSG00000079819
ENSG00000168397	ENSG00000131171
ENSG00000177239	ENSG00000131171
ENSG00000077684	ENSG00000131171
ENSG00000152977	ENSG00000131171
ENSG00000185158	ENSG00000131171
ENSG00000143393	ENSG00000099308
ENSG00000003393	ENSG00000132329
ENSG00000139546	ENSG00000167085
ENSG00000163882	ENSG00000079819
ENSG00000087269	ENSG00000133313
ENSG00000112062	ENSG00000120658
ENSG00000152977	ENSG00000133983
ENSG00000117682	ENSG00000152137
ENSG00000132155	ENSG00000197448
ENSG00000117682	ENSG00000215039
ENSG00000176953	ENSG00000133313
ENSG00000003393	ENSG00000255135
ENSG00000143437	ENSG00000122378
ENSG00000053254	ENSG00000131171
ENSG00000145041	ENSG00000154447
ENSG00000140829	ENSG00000131171
ENSG00000161036	ENSG00000123119
ENSG00000141084	ENSG00000131171
ENSG00000185485	ENSG00000131171
ENSG00000003393	ENSG00000154654
ENSG00000152977	ENSG00000069535
ENSG00000152977	ENSG00000203778
ENSG00000189337	ENSG00000249242
ENSG00000158545	ENSG00000099308
ENSG00000152977	ENSG00000152558
ENSG00000077782	ENSG00000123119
ENSG00000138834	ENSG00000131171
ENSG00000152977	ENSG00000147592
ENSG00000132153	ENSG00000138650
ENSG00000135124	ENSG00000184304
ENSG00000140553	ENSG00000131171
ENSG00000239569	ENSG00000106785
ENSG00000152977	ENSG00000103449
ENSG00000174282	ENSG00000131171
ENSG00000168758	ENSG00000249242
ENSG00000215908	ENSG00000170017
ENSG00000072786	ENSG00000104067
ENSG00000152977	ENSG00000156110
ENSG00000135776	ENSG00000079819
ENSG00000152977	ENSG00000133789
ENSG00000117682	ENSG00000134248
ENSG00000116754	ENSG00000249242
ENSG00000168246	ENSG00000185825
ENSG00000006468	ENSG00000136810
ENSG00000152977	ENSG00000102024
ENSG00000070501	ENSG00000120860
ENSG00000152977	ENSG00000175482
ENSG00000165671	ENSG00000099308
ENSG00000178498	ENSG00000131171
ENSG00000006468	ENSG00000260032
ENSG00000114098	ENSG00000100364
ENSG00000144029	ENSG00000131171
ENSG00000135124	ENSG00000147010
ENSG00000132182	ENSG00000249242
ENSG00000172046	ENSG00000123119
ENSG00000135124	ENSG00000099785
ENSG00000130764	ENSG00000079819
ENSG00000125651	ENSG00000131171
ENSG00000177733	ENSG00000079819
ENSG00000204084	ENSG00000249242
ENSG00000003393	ENSG00000214026
ENSG00000239569	ENSG00000078304
ENSG00000146830	ENSG00000122378
ENSG00000109606	ENSG00000123119
ENSG00000152977	ENSG00000069122
ENSG00000055917	ENSG00000079819
ENSG00000152977	ENSG00000102032
ENSG00000153561	ENSG00000170017
ENSG00000181555	ENSG00000109576
ENSG00000152977	ENSG00000160310
ENSG00000114650	ENSG00000131171
ENSG00000138606	ENSG00000140859
ENSG00000003393	ENSG00000135441
ENSG00000137171	ENSG00000215039
ENSG00000087269	ENSG00000197448
ENSG00000152977	ENSG00000112977
ENSG00000070047	ENSG00000215039
ENSG00000138050	ENSG00000120658
ENSG00000139546	ENSG00000131171
ENSG00000167792	ENSG00000131171
ENSG00000087269	ENSG00000122378
ENSG00000135124	ENSG00000100364
ENSG00000125450	ENSG00000124209
ENSG00000126107	ENSG00000099308
ENSG00000161204	ENSG00000131171
ENSG00000113761	ENSG00000131171
ENSG00000164654	ENSG00000131171
ENSG00000178950	ENSG00000131171
ENSG00000185219	ENSG00000215039
ENSG00000152977	ENSG00000101367
ENSG00000148343	ENSG00000131171
ENSG00000135124	ENSG00000185043
ENSG00000158669	ENSG00000123119
ENSG00000138050	ENSG00000079819
ENSG00000113300	ENSG00000079819
ENSG00000139546	ENSG00000205155
ENSG00000152977	ENSG00000205542
ENSG00000159761	ENSG00000167085
ENSG00000160404	ENSG00000131171
ENSG00000134262	ENSG00000131171
ENSG00000159692	ENSG00000215039
ENSG00000163872	ENSG00000249242
ENSG00000137656	ENSG00000215039
ENSG00000158941	ENSG00000099308
ENSG00000004866	ENSG00000131171
ENSG00000158941	ENSG00000123119
ENSG00000117682	ENSG00000100605
ENSG00000152977	ENSG00000198157
ENSG00000109606	ENSG00000154447
ENSG00000239569	ENSG00000131171
ENSG00000139546	ENSG00000167543
ENSG00000182087	ENSG00000131171
ENSG00000113240	ENSG00000108179
ENSG00000004487	ENSG00000131171
ENSG00000038219	ENSG00000249242
ENSG00000146587	ENSG00000123119
ENSG00000006468	ENSG00000101363
ENSG00000135945	ENSG00000122378
ENSG00000152977	ENSG00000095739
ENSG00000162607	ENSG00000170017
ENSG00000114098	ENSG00000152137
ENSG00000152977	ENSG00000124333
ENSG00000152977	ENSG00000258056
ENSG00000167962	ENSG00000131171
ENSG00000142751	ENSG00000131171
ENSG00000117682	ENSG00000157617
ENSG00000077097	ENSG00000170017
ENSG00000162415	ENSG00000131171
ENSG00000163939	ENSG00000170017
ENSG00000003393	ENSG00000106400
ENSG00000185219	ENSG00000079819
ENSG00000055609	ENSG00000131171
ENSG00000198795	ENSG00000069535
ENSG00000075975	ENSG00000154447
ENSG00000078808	ENSG00000215039
ENSG00000152977	ENSG00000133739
ENSG00000239569	ENSG00000149547
ENSG00000168591	ENSG00000131171
ENSG00000159692	ENSG00000079819
ENSG00000070501	ENSG00000119328
ENSG00000145041	ENSG00000079819
ENSG00000137310	ENSG00000131171
ENSG00000095059	ENSG00000131171
ENSG00000152977	ENSG00000164106
ENSG00000116698	ENSG00000123119
ENSG00000151692	ENSG00000249242
ENSG00000127527	ENSG00000131171
ENSG00000118518	ENSG00000152137
ENSG00000103326	ENSG00000099308
ENSG00000152977	ENSG00000130755
ENSG00000070501	ENSG00000119705
ENSG00000157933	ENSG00000106948
ENSG00000006468	ENSG00000167740
ENSG00000172273	ENSG00000131171
ENSG00000198795	ENSG00000131171
ENSG00000152977	ENSG00000132963
ENSG00000189091	ENSG00000131171
ENSG00000114098	ENSG00000079819
ENSG00000152977	ENSG00000136522
ENSG00000156026	ENSG00000100605
ENSG00000037637	ENSG00000131171
ENSG00000173210	ENSG00000079819
ENSG00000003393	ENSG00000269293
ENSG00000107819	ENSG00000215039
ENSG00000112062	ENSG00000079819
ENSG00000145041	ENSG00000123119
ENSG00000152977	ENSG00000063241
ENSG00000159692	ENSG00000123119
ENSG00000049618	ENSG00000215039
ENSG00000065060	ENSG00000123119
ENSG00000003393	ENSG00000155115
ENSG00000066136	ENSG00000255248
ENSG00000006468	ENSG00000184226
ENSG00000079432	ENSG00000131171
ENSG00000173065	ENSG00000131171
ENSG00000132153	ENSG00000131171
ENSG00000003393	ENSG00000127540
ENSG00000126107	ENSG00000215039
ENSG00000099381	ENSG00000131171
ENSG00000214367	ENSG00000249242
ENSG00000152977	ENSG00000205544
ENSG00000147548	ENSG00000122378
ENSG00000162302	ENSG00000215039
ENSG00000106346	ENSG00000131171
ENSG00000143224	ENSG00000131171
ENSG00000169085	ENSG00000135124
ENSG00000131368	ENSG00000079819
ENSG00000171467	ENSG00000131171
ENSG00000168137	ENSG00000122378
ENSG00000135945	ENSG00000133313
ENSG00000158161	ENSG00000131171
ENSG00000135776	ENSG00000249242
ENSG00000116698	ENSG00000079819
ENSG00000152977	ENSG00000175387
ENSG00000158941	ENSG00000215039
ENSG00000152977	ENSG00000205155
ENSG00000070501	ENSG00000122033
ENSG00000126746	ENSG00000099308
ENSG00000006468	ENSG00000132963
ENSG00000066136	ENSG00000131171
ENSG00000108312	ENSG00000131171
ENSG00000139625	ENSG00000131171
ENSG00000152977	ENSG00000160213
ENSG00000111653	ENSG00000131171
ENSG00000115042	ENSG00000131171
ENSG00000198795	ENSG00000132669
ENSG00000132323	ENSG00000123119
ENSG00000125450	ENSG00000133313
ENSG00000163788	ENSG00000170017
ENSG00000003393	ENSG00000169189
ENSG00000126107	ENSG00000079819
ENSG00000143515	ENSG00000131171
ENSG00000087269	ENSG00000255248
ENSG00000135775	ENSG00000249242
ENSG00000152977	ENSG00000106948
ENSG00000003393	ENSG00000149932
ENSG00000161999	ENSG00000131171
ENSG00000114098	ENSG00000184428
ENSG00000168246	ENSG00000122378
ENSG00000135945	ENSG00000170017
ENSG00000120616	ENSG00000236819
ENSG00000006607	ENSG00000249242
ENSG00000117682	ENSG00000100364
ENSG00000006468	ENSG00000082641
ENSG00000239569	ENSG00000100418
ENSG00000168566	ENSG00000131171
ENSG00000003393	ENSG00000064490
ENSG00000135124	ENSG00000099308
ENSG00000117682	ENSG00000183723
ENSG00000162714	ENSG00000123119
ENSG00000139546	ENSG00000111229
ENSG00000163719	ENSG00000099308
ENSG00000215908	ENSG00000124209
ENSG00000168246	ENSG00000197448
ENSG00000115216	ENSG00000131171
ENSG00000198795	ENSG00000102032
ENSG00000081721	ENSG00000079819
ENSG00000131732	ENSG00000079819

## Sheet: Cluster_4
GCN Cluster 4
ENSG00000168028	ENSG00000131171
ENSG00000134001	ENSG00000131171
ENSG00000140395	ENSG00000131171
ENSG00000134644	ENSG00000131171
ENSG00000170871	ENSG00000215039
ENSG00000175166	ENSG00000131171
ENSG00000127884	ENSG00000131171
ENSG00000136936	ENSG00000131171
ENSG00000232112	ENSG00000131171
ENSG00000116221	ENSG00000131171
ENSG00000160710	ENSG00000131171
ENSG00000163608	ENSG00000079819
ENSG00000084090	ENSG00000079819
ENSG00000267321	ENSG00000131171
ENSG00000167461	ENSG00000131171
ENSG00000115694	ENSG00000131171
ENSG00000172331	ENSG00000131171
ENSG00000174444	ENSG00000131171
ENSG00000152102	ENSG00000131171
ENSG00000100813	ENSG00000131171
ENSG00000182606	ENSG00000131171
ENSG00000114388	ENSG00000099308
ENSG00000109775	ENSG00000131171
ENSG00000117862	ENSG00000131171
ENSG00000141644	ENSG00000131171
ENSG00000138279	ENSG00000215039
ENSG00000124535	ENSG00000079819
ENSG00000197713	ENSG00000131171
ENSG00000135211	ENSG00000131171
ENSG00000110917	ENSG00000131171
ENSG00000149196	ENSG00000131171
ENSG00000169221	ENSG00000131171
ENSG00000029363	ENSG00000123119
ENSG00000234545	ENSG00000131171
ENSG00000134440	ENSG00000131171
ENSG00000145919	ENSG00000079819
ENSG00000103653	ENSG00000131171
ENSG00000115839	ENSG00000131171
ENSG00000249915	ENSG00000131171
ENSG00000054282	ENSG00000131171
ENSG00000070814	ENSG00000131171
ENSG00000177565	ENSG00000131171
ENSG00000067704	ENSG00000131171
ENSG00000113648	ENSG00000079819
ENSG00000162775	ENSG00000123119
ENSG00000204344	ENSG00000131171
ENSG00000087191	ENSG00000131171
ENSG00000090621	ENSG00000131171
ENSG00000240857	ENSG00000249242
ENSG00000041988	ENSG00000131171
ENSG00000143575	ENSG00000131171
ENSG00000204427	ENSG00000131171
ENSG00000140259	ENSG00000131171
ENSG00000198815	ENSG00000123119
ENSG00000143294	ENSG00000079819
ENSG00000132128	ENSG00000131171
ENSG00000135241	ENSG00000131171
ENSG00000143811	ENSG00000131171
ENSG00000145901	ENSG00000079819
ENSG00000172586	ENSG00000131171
ENSG00000198060	ENSG00000131171
ENSG00000156873	ENSG00000131171
ENSG00000135336	ENSG00000131171
ENSG00000198752	ENSG00000131171
ENSG00000181929	ENSG00000131171
ENSG00000132153	ENSG00000249242
ENSG00000113621	ENSG00000131171
ENSG00000187778	ENSG00000131171
ENSG00000125912	ENSG00000131171
ENSG00000177731	ENSG00000131171
ENSG00000006194	ENSG00000131171
ENSG00000172809	ENSG00000131171
ENSG00000213079	ENSG00000123119
ENSG00000105254	ENSG00000131171
ENSG00000085998	ENSG00000131171
ENSG00000158435	ENSG00000131171
ENSG00000204568	ENSG00000079819
ENSG00000079332	ENSG00000131171
ENSG00000132912	ENSG00000079819
ENSG00000146463	ENSG00000079819
ENSG00000123106	ENSG00000131171
ENSG00000177646	ENSG00000131171
ENSG00000130921	ENSG00000131171
ENSG00000119231	ENSG00000131171
ENSG00000125755	ENSG00000131171
ENSG00000130005	ENSG00000131171
ENSG00000130640	ENSG00000131171
ENSG00000120688	ENSG00000131171
ENSG00000164902	ENSG00000131171
ENSG00000151348	ENSG00000131171
ENSG00000135930	ENSG00000131171
ENSG00000163900	ENSG00000131171
ENSG00000165861	ENSG00000131171
ENSG00000147457	ENSG00000131171
ENSG00000167881	ENSG00000131171
ENSG00000175390	ENSG00000131171
ENSG00000105185	ENSG00000131171
ENSG00000164494	ENSG00000131171
ENSG00000125484	ENSG00000131171
ENSG00000185813	ENSG00000131171
ENSG00000177383	ENSG00000131171
ENSG00000164080	ENSG00000109576
ENSG00000110063	ENSG00000131171
ENSG00000112592	ENSG00000123119
ENSG00000105127	ENSG00000131171
ENSG00000094916	ENSG00000131171
ENSG00000072756	ENSG00000249242
ENSG00000115286	ENSG00000131171
ENSG00000131165	ENSG00000131171
ENSG00000008130	ENSG00000131171
ENSG00000122705	ENSG00000131171
ENSG00000075415	ENSG00000131171
ENSG00000115204	ENSG00000079819
ENSG00000143363	ENSG00000131171
ENSG00000204138	ENSG00000249242
ENSG00000124535	ENSG00000215039
ENSG00000214160	ENSG00000131171
ENSG00000134086	ENSG00000123119
ENSG00000013275	ENSG00000131171
ENSG00000176209	ENSG00000131171
ENSG00000105186	ENSG00000131171
ENSG00000132581	ENSG00000131171
ENSG00000214046	ENSG00000131171
ENSG00000198380	ENSG00000249242
ENSG00000114867	ENSG00000131171
ENSG00000166477	ENSG00000131171
ENSG00000123349	ENSG00000131171
ENSG00000165264	ENSG00000131171
ENSG00000166548	ENSG00000131171
ENSG00000064115	ENSG00000131171
ENSG00000179562	ENSG00000131171
ENSG00000131236	ENSG00000079819
ENSG00000100811	ENSG00000131171
ENSG00000116688	ENSG00000131171
ENSG00000112514	ENSG00000131171
ENSG00000148248	ENSG00000131171
ENSG00000171161	ENSG00000131171
ENSG00000056097	ENSG00000131171
ENSG00000065802	ENSG00000123119
ENSG00000114316	ENSG00000131171
ENSG00000205352	ENSG00000131171
ENSG00000123154	ENSG00000131171
ENSG00000175216	ENSG00000131171
ENSG00000132394	ENSG00000131171
ENSG00000166233	ENSG00000131171
ENSG00000130560	ENSG00000131171
ENSG00000196943	ENSG00000131171
ENSG00000117748	ENSG00000131171
ENSG00000106609	ENSG00000131171
ENSG00000132522	ENSG00000131171
ENSG00000155876	ENSG00000131171
ENSG00000163961	ENSG00000249242
ENSG00000155827	ENSG00000131171
ENSG00000100575	ENSG00000131171
ENSG00000109572	ENSG00000131171
ENSG00000150316	ENSG00000131171
ENSG00000189376	ENSG00000131171
ENSG00000113194	ENSG00000123119
ENSG00000115274	ENSG00000131171
ENSG00000164338	ENSG00000123119
ENSG00000111271	ENSG00000131171
ENSG00000138777	ENSG00000131171
ENSG00000270696	ENSG00000131171
ENSG00000169689	ENSG00000131171
ENSG00000204316	ENSG00000131171
ENSG00000135845	ENSG00000131171
ENSG00000144635	ENSG00000249242
ENSG00000163902	ENSG00000131171
ENSG00000197226	ENSG00000131171
ENSG00000114503	ENSG00000131171
ENSG00000140365	ENSG00000131171
ENSG00000183513	ENSG00000079819
ENSG00000231889	ENSG00000131171
ENSG00000116273	ENSG00000131171
ENSG00000161203	ENSG00000249242
ENSG00000126088	ENSG00000131171
ENSG00000142444	ENSG00000131171
ENSG00000136935	ENSG00000131171
ENSG00000070366	ENSG00000131171
ENSG00000138668	ENSG00000079819
ENSG00000204209	ENSG00000079819
ENSG00000164024	ENSG00000131171
ENSG00000077549	ENSG00000079819
ENSG00000087365	ENSG00000131171
ENSG00000138398	ENSG00000170017
ENSG00000117751	ENSG00000131171
ENSG00000167515	ENSG00000131171
ENSG00000138750	ENSG00000123119
ENSG00000116580	ENSG00000249242
ENSG00000163541	ENSG00000131171
ENSG00000054267	ENSG00000170017
ENSG00000141002	ENSG00000131171
ENSG00000198917	ENSG00000131171
ENSG00000109133	ENSG00000131171
ENSG00000135365	ENSG00000131171
ENSG00000186132	ENSG00000131171
ENSG00000108788	ENSG00000131171
ENSG00000171103	ENSG00000249242
ENSG00000135334	ENSG00000131171
ENSG00000119820	ENSG00000170017
ENSG00000204310	ENSG00000131171
ENSG00000160688	ENSG00000131171
ENSG00000267855	ENSG00000131171
ENSG00000168096	ENSG00000131171
ENSG00000163904	ENSG00000131171
ENSG00000172775	ENSG00000131171
ENSG00000211460	ENSG00000079819
ENSG00000176783	ENSG00000131171
ENSG00000115446	ENSG00000079819
ENSG00000069345	ENSG00000131171
ENSG00000175110	ENSG00000215039
ENSG00000267796	ENSG00000131171
ENSG00000135624	ENSG00000079819
ENSG00000159346	ENSG00000131171
ENSG00000163743	ENSG00000131171
ENSG00000176946	ENSG00000079819
ENSG00000132768	ENSG00000131171
ENSG00000106443	ENSG00000131171
ENSG00000124299	ENSG00000131171
ENSG00000117592	ENSG00000249242
ENSG00000114062	ENSG00000131171
ENSG00000130254	ENSG00000131171
ENSG00000153015	ENSG00000079819
ENSG00000188725	ENSG00000131171
ENSG00000132361	ENSG00000131171
ENSG00000196116	ENSG00000131171
ENSG00000188603	ENSG00000131171
ENSG00000122557	ENSG00000131171
ENSG00000137413	ENSG00000131171
ENSG00000170464	ENSG00000079819
ENSG00000103769	ENSG00000131171
ENSG00000151148	ENSG00000131171
ENSG00000124541	ENSG00000131171
ENSG00000069248	ENSG00000249242
ENSG00000008869	ENSG00000249242
ENSG00000135390	ENSG00000131171
ENSG00000167283	ENSG00000131171
ENSG00000160633	ENSG00000131171
ENSG00000084652	ENSG00000131171
ENSG00000074582	ENSG00000131171
ENSG00000140400	ENSG00000131171
ENSG00000120733	ENSG00000215039
ENSG00000196652	ENSG00000123119
ENSG00000169955	ENSG00000131171
ENSG00000146416	ENSG00000131171
ENSG00000121897	ENSG00000131171
ENSG00000092098	ENSG00000131171
ENSG00000169696	ENSG00000131171
ENSG00000130733	ENSG00000131171
ENSG00000177981	ENSG00000131171
ENSG00000076201	ENSG00000131171
ENSG00000139531	ENSG00000131171
ENSG00000142002	ENSG00000131171
ENSG00000163479	ENSG00000131171
ENSG00000136243	ENSG00000131171
ENSG00000103994	ENSG00000131171
ENSG00000138668	ENSG00000123119
ENSG00000103043	ENSG00000131171
ENSG00000072803	ENSG00000131171
ENSG00000145022	ENSG00000215039
ENSG00000149016	ENSG00000131171
ENSG00000091542	ENSG00000131171
ENSG00000226950	ENSG00000249242
ENSG00000213246	ENSG00000131171
ENSG00000178988	ENSG00000131171
ENSG00000113312	ENSG00000131171
ENSG00000163156	ENSG00000131171
ENSG00000135040	ENSG00000131171
ENSG00000105248	ENSG00000131171
ENSG00000141562	ENSG00000131171
ENSG00000138750	ENSG00000079819
ENSG00000082068	ENSG00000079819
ENSG00000016864	ENSG00000131171
ENSG00000196235	ENSG00000131171
ENSG00000108592	ENSG00000131171
ENSG00000107521	ENSG00000131171
ENSG00000204308	ENSG00000131171
ENSG00000161204	ENSG00000249242
ENSG00000121067	ENSG00000131171
ENSG00000132676	ENSG00000079819
ENSG00000204498	ENSG00000131171
ENSG00000014919	ENSG00000131171
ENSG00000165698	ENSG00000131171
ENSG00000169905	ENSG00000131171
ENSG00000108561	ENSG00000131171
ENSG00000140391	ENSG00000131171
ENSG00000160953	ENSG00000131171
ENSG00000196653	ENSG00000123119
ENSG00000204946	ENSG00000131171
ENSG00000155868	ENSG00000131171
ENSG00000078070	ENSG00000079819
ENSG00000138246	ENSG00000131171
ENSG00000215717	ENSG00000079819
ENSG00000106052	ENSG00000131171
ENSG00000113194	ENSG00000079819
ENSG00000090470	ENSG00000131171
ENSG00000171135	ENSG00000131171
ENSG00000183431	ENSG00000079819
ENSG00000204439	ENSG00000131171
ENSG00000182208	ENSG00000131171
ENSG00000113648	ENSG00000123119
ENSG00000155287	ENSG00000131171
ENSG00000167118	ENSG00000131171
ENSG00000112511	ENSG00000131171
ENSG00000118579	ENSG00000079819
ENSG00000132604	ENSG00000131171
ENSG00000151465	ENSG00000131171
ENSG00000147419	ENSG00000131171
ENSG00000153485	ENSG00000131171
ENSG00000126698	ENSG00000131171
ENSG00000160087	ENSG00000131171
ENSG00000108591	ENSG00000131171
ENSG00000137411	ENSG00000131171
ENSG00000165502	ENSG00000131171
ENSG00000143621	ENSG00000079819
ENSG00000167272	ENSG00000131171
ENSG00000119718	ENSG00000131171
ENSG00000100814	ENSG00000131171
ENSG00000156973	ENSG00000079819
ENSG00000143776	ENSG00000131171
ENSG00000184220	ENSG00000123119
ENSG00000063978	ENSG00000079819
ENSG00000025796	ENSG00000079819
ENSG00000173409	ENSG00000131171
ENSG00000112118	ENSG00000131171
ENSG00000159111	ENSG00000131171
ENSG00000143727	ENSG00000131171
ENSG00000213965	ENSG00000131171
ENSG00000102921	ENSG00000131171
ENSG00000124357	ENSG00000131171
ENSG00000124532	ENSG00000079819
ENSG00000166311	ENSG00000131171
ENSG00000175334	ENSG00000131171
ENSG00000163348	ENSG00000131171
ENSG00000185787	ENSG00000131171
ENSG00000169490	ENSG00000131171
ENSG00000058056	ENSG00000249242
ENSG00000136240	ENSG00000131171
ENSG00000163636	ENSG00000131171
ENSG00000179051	ENSG00000131171
ENSG00000085644	ENSG00000131171
ENSG00000114388	ENSG00000079819
ENSG00000143337	ENSG00000131171
ENSG00000129084	ENSG00000131171
ENSG00000120733	ENSG00000079819
ENSG00000156467	ENSG00000131171
ENSG00000128829	ENSG00000131171
ENSG00000198912	ENSG00000131171
ENSG00000124562	ENSG00000079819
ENSG00000135452	ENSG00000131171
ENSG00000197150	ENSG00000131171
ENSG00000144357	ENSG00000249242
ENSG00000145022	ENSG00000079819
ENSG00000227946	ENSG00000249242
ENSG00000161265	ENSG00000131171
ENSG00000149929	ENSG00000131171
ENSG00000115806	ENSG00000079819
ENSG00000147654	ENSG00000131171
ENSG00000132388	ENSG00000131171
ENSG00000095906	ENSG00000131171
ENSG00000130175	ENSG00000131171
ENSG00000103363	ENSG00000131171
ENSG00000077157	ENSG00000249242
ENSG00000144674	ENSG00000123119
ENSG00000175193	ENSG00000131171
ENSG00000143258	ENSG00000131171
ENSG00000156931	ENSG00000249242
ENSG00000169740	ENSG00000131171
ENSG00000121578	ENSG00000249242
ENSG00000177971	ENSG00000131171
ENSG00000204438	ENSG00000131171
ENSG00000065491	ENSG00000131171
ENSG00000106459	ENSG00000131171
ENSG00000020426	ENSG00000131171
ENSG00000148399	ENSG00000131171
ENSG00000112304	ENSG00000131171
ENSG00000131653	ENSG00000131171
ENSG00000126067	ENSG00000131171
ENSG00000092020	ENSG00000131171
ENSG00000122033	ENSG00000131171
ENSG00000129691	ENSG00000131171
ENSG00000157954	ENSG00000122378
ENSG00000012061	ENSG00000131171
ENSG00000143553	ENSG00000079819
ENSG00000109390	ENSG00000131171
ENSG00000142751	ENSG00000249242
ENSG00000085511	ENSG00000099308
ENSG00000013306	ENSG00000131171
ENSG00000168288	ENSG00000131171
ENSG00000185963	ENSG00000131171
ENSG00000171453	ENSG00000131171
ENSG00000114686	ENSG00000131171
ENSG00000175213	ENSG00000131171
ENSG00000121486	ENSG00000131171
ENSG00000144036	ENSG00000079819
ENSG00000065154	ENSG00000131171
ENSG00000174891	ENSG00000249242
ENSG00000117385	ENSG00000249242
ENSG00000162521	ENSG00000079819
ENSG00000103194	ENSG00000131171
ENSG00000149930	ENSG00000131171
ENSG00000071073	ENSG00000249242
ENSG00000112473	ENSG00000131171
ENSG00000166902	ENSG00000131171
ENSG00000140374	ENSG00000131171
ENSG00000065427	ENSG00000131171
ENSG00000123144	ENSG00000131171
ENSG00000113558	ENSG00000131171
ENSG00000146576	ENSG00000131171
ENSG00000163159	ENSG00000131171
ENSG00000006125	ENSG00000131171
ENSG00000159348	ENSG00000131171
ENSG00000187391	ENSG00000131171
ENSG00000178127	ENSG00000131171
ENSG00000104980	ENSG00000131171
ENSG00000239305	ENSG00000170017
ENSG00000145912	ENSG00000079819
ENSG00000163938	ENSG00000249242
ENSG00000137522	ENSG00000131171
ENSG00000075785	ENSG00000131171
ENSG00000145016	ENSG00000131171
ENSG00000138385	ENSG00000131171
ENSG00000137210	ENSG00000131171
ENSG00000008324	ENSG00000131171
ENSG00000111707	ENSG00000131171
ENSG00000244038	ENSG00000131171
ENSG00000129472	ENSG00000131171
ENSG00000132591	ENSG00000131171
ENSG00000060971	ENSG00000215039
ENSG00000076043	ENSG00000131171
ENSG00000183726	ENSG00000131171
ENSG00000082212	ENSG00000131171
ENSG00000108010	ENSG00000131171
ENSG00000142784	ENSG00000131171
ENSG00000119953	ENSG00000131171
ENSG00000164134	ENSG00000123119
ENSG00000105771	ENSG00000131171
ENSG00000017260	ENSG00000131171
ENSG00000132376	ENSG00000131171
ENSG00000137992	ENSG00000131171
ENSG00000160058	ENSG00000079819
ENSG00000133997	ENSG00000131171
ENSG00000115234	ENSG00000131171
ENSG00000162869	ENSG00000131171
ENSG00000065518	ENSG00000131171
ENSG00000067248	ENSG00000079819
ENSG00000186448	ENSG00000170017
ENSG00000116288	ENSG00000131171
ENSG00000143633	ENSG00000123119
ENSG00000124571	ENSG00000123119
ENSG00000183718	ENSG00000099308
ENSG00000133935	ENSG00000131171
ENSG00000177463	ENSG00000249242
ENSG00000204356	ENSG00000131171
ENSG00000100442	ENSG00000131171
ENSG00000165156	ENSG00000131171
ENSG00000159596	ENSG00000079819
ENSG00000174243	ENSG00000131171
ENSG00000066117	ENSG00000131171
ENSG00000152942	ENSG00000131171
ENSG00000162604	ENSG00000249242
ENSG00000180329	ENSG00000131171
ENSG00000186141	ENSG00000249242
ENSG00000164941	ENSG00000131171
ENSG00000196510	ENSG00000131171
ENSG00000075151	ENSG00000249242
ENSG00000135999	ENSG00000131171
ENSG00000084733	ENSG00000131171
ENSG00000173992	ENSG00000131171
ENSG00000166887	ENSG00000131171
ENSG00000152795	ENSG00000249242
ENSG00000266173	ENSG00000131171
ENSG00000112237	ENSG00000131171
ENSG00000168385	ENSG00000123119
ENSG00000142208	ENSG00000131171
ENSG00000075336	ENSG00000131171
ENSG00000119559	ENSG00000131171
ENSG00000125944	ENSG00000170017
ENSG00000182749	ENSG00000249242
ENSG00000064545	ENSG00000131171
ENSG00000133773	ENSG00000131171
ENSG00000112308	ENSG00000131171
ENSG00000137133	ENSG00000131171
ENSG00000126883	ENSG00000131171
ENSG00000105135	ENSG00000131171
ENSG00000089597	ENSG00000131171
ENSG00000153187	ENSG00000079819
ENSG00000162300	ENSG00000131171
ENSG00000112685	ENSG00000131171
ENSG00000204406	ENSG00000249242
ENSG00000105656	ENSG00000131171
ENSG00000104660	ENSG00000215039
ENSG00000167863	ENSG00000131171
ENSG00000151498	ENSG00000131171
ENSG00000113282	ENSG00000131171
ENSG00000136819	ENSG00000131171
ENSG00000198492	ENSG00000131171
ENSG00000149547	ENSG00000215039
ENSG00000211455	ENSG00000131171
ENSG00000135766	ENSG00000131171
ENSG00000075624	ENSG00000123119
ENSG00000123297	ENSG00000131171
ENSG00000162769	ENSG00000249242
ENSG00000198730	ENSG00000215039
ENSG00000110711	ENSG00000131171
ENSG00000114026	ENSG00000131171
ENSG00000149792	ENSG00000131171
ENSG00000091483	ENSG00000131171
ENSG00000078618	ENSG00000131171
ENSG00000117713	ENSG00000131171
ENSG00000073803	ENSG00000131171
ENSG00000115677	ENSG00000131171
ENSG00000143761	ENSG00000131171
ENSG00000179335	ENSG00000131171
ENSG00000161202	ENSG00000079819
ENSG00000133393	ENSG00000131171
ENSG00000073050	ENSG00000131171
ENSG00000059573	ENSG00000215039
ENSG00000071994	ENSG00000131171
ENSG00000060971	ENSG00000079819
ENSG00000112078	ENSG00000131171
ENSG00000173950	ENSG00000249242
ENSG00000116138	ENSG00000249242
ENSG00000183520	ENSG00000131171
ENSG00000121022	ENSG00000131171
ENSG00000138231	ENSG00000249242
ENSG00000171055	ENSG00000131171
ENSG00000166024	ENSG00000131171
ENSG00000121073	ENSG00000131171
ENSG00000143368	ENSG00000131171
ENSG00000166716	ENSG00000131171
ENSG00000156469	ENSG00000131171
ENSG00000160799	ENSG00000215039
ENSG00000173933	ENSG00000131171
ENSG00000205423	ENSG00000131171
ENSG00000185127	ENSG00000131171
ENSG00000110906	ENSG00000131171
ENSG00000198898	ENSG00000131171
ENSG00000218739	ENSG00000131171
ENSG00000164654	ENSG00000123119
ENSG00000110871	ENSG00000131171
ENSG00000117899	ENSG00000131171
ENSG00000011275	ENSG00000131171
ENSG00000102738	ENSG00000131171
ENSG00000107175	ENSG00000131171
ENSG00000104969	ENSG00000131171
ENSG00000181610	ENSG00000131171
ENSG00000143207	ENSG00000131171
ENSG00000137312	ENSG00000123119
ENSG00000090661	ENSG00000131171
ENSG00000198546	ENSG00000131171
ENSG00000204304	ENSG00000131171
ENSG00000197265	ENSG00000131171
ENSG00000028310	ENSG00000131171
ENSG00000167674	ENSG00000131171
ENSG00000148335	ENSG00000131171
ENSG00000099821	ENSG00000131171
ENSG00000115816	ENSG00000123119
ENSG00000167862	ENSG00000131171
ENSG00000172053	ENSG00000131171
ENSG00000100567	ENSG00000131171
ENSG00000132153	ENSG00000215039
ENSG00000025800	ENSG00000249242
ENSG00000160917	ENSG00000131171
ENSG00000120159	ENSG00000131171
ENSG00000132612	ENSG00000131171
ENSG00000105401	ENSG00000131171
ENSG00000092108	ENSG00000131171
ENSG00000159479	ENSG00000131171
ENSG00000089280	ENSG00000099308
ENSG00000128951	ENSG00000131171
ENSG00000127837	ENSG00000131171
ENSG00000177479	ENSG00000249242
ENSG00000168286	ENSG00000131171
ENSG00000204120	ENSG00000079819
ENSG00000077549	ENSG00000249242
ENSG00000138375	ENSG00000131171
ENSG00000115091	ENSG00000131171
ENSG00000143793	ENSG00000131171
ENSG00000179833	ENSG00000123119
ENSG00000079246	ENSG00000170017
ENSG00000156232	ENSG00000131171
ENSG00000106245	ENSG00000131171
ENSG00000119772	ENSG00000249242
ENSG00000141582	ENSG00000131171
ENSG00000160908	ENSG00000131171
ENSG00000133961	ENSG00000131171
ENSG00000179010	ENSG00000131171
ENSG00000119318	ENSG00000131171
ENSG00000009335	ENSG00000131171
ENSG00000183723	ENSG00000131171
ENSG00000128463	ENSG00000131171
ENSG00000254999	ENSG00000131171
ENSG00000136444	ENSG00000131171
ENSG00000114107	ENSG00000131171
ENSG00000050426	ENSG00000131171
ENSG00000085449	ENSG00000131171
ENSG00000138399	ENSG00000131171
ENSG00000196591	ENSG00000123119
ENSG00000183605	ENSG00000131171
ENSG00000172239	ENSG00000079819
ENSG00000078043	ENSG00000131171
ENSG00000131446	ENSG00000131171
ENSG00000204560	ENSG00000123119
ENSG00000078967	ENSG00000131171
ENSG00000163785	ENSG00000123119
ENSG00000146834	ENSG00000215039
ENSG00000179526	ENSG00000131171
ENSG00000102931	ENSG00000131171
ENSG00000198952	ENSG00000131171
ENSG00000079999	ENSG00000131171
ENSG00000090432	ENSG00000131171
ENSG00000170242	ENSG00000131171
ENSG00000100612	ENSG00000131171
ENSG00000140320	ENSG00000131171
ENSG00000130770	ENSG00000131171
ENSG00000105583	ENSG00000131171
ENSG00000130811	ENSG00000131171
ENSG00000084693	ENSG00000079819
ENSG00000080802	ENSG00000131171
ENSG00000259943	ENSG00000249242
ENSG00000105397	ENSG00000131171
ENSG00000076242	ENSG00000131171
ENSG00000165629	ENSG00000131171
ENSG00000047932	ENSG00000131171
ENSG00000140382	ENSG00000131171
ENSG00000136856	ENSG00000131171
ENSG00000041802	ENSG00000131171
ENSG00000165283	ENSG00000255248
ENSG00000073578	ENSG00000131171
ENSG00000108523	ENSG00000131171
ENSG00000114859	ENSG00000249242
ENSG00000178982	ENSG00000131171
ENSG00000117118	ENSG00000131171
ENSG00000129518	ENSG00000131171
ENSG00000163510	ENSG00000170017
ENSG00000071189	ENSG00000131171
ENSG00000116685	ENSG00000131171
ENSG00000110074	ENSG00000131171
ENSG00000214174	ENSG00000131171
ENSG00000103051	ENSG00000131171
ENSG00000103126	ENSG00000131171
ENSG00000119820	ENSG00000131171
ENSG00000166226	ENSG00000131171
ENSG00000072042	ENSG00000131171
ENSG00000132254	ENSG00000131171
ENSG00000175203	ENSG00000131171
ENSG00000172172	ENSG00000131171
ENSG00000123159	ENSG00000131171
ENSG00000169718	ENSG00000131171
ENSG00000168101	ENSG00000131171
ENSG00000145216	ENSG00000131171
ENSG00000109536	ENSG00000131171
ENSG00000115241	ENSG00000079819
ENSG00000137996	ENSG00000131171
ENSG00000135617	ENSG00000131171
ENSG00000143543	ENSG00000079819
ENSG00000165660	ENSG00000131171
ENSG00000141456	ENSG00000131171
ENSG00000074201	ENSG00000131171
ENSG00000110435	ENSG00000131171
ENSG00000100528	ENSG00000131171
ENSG00000173011	ENSG00000131171
ENSG00000179091	ENSG00000215039
ENSG00000196544	ENSG00000131171
ENSG00000164040	ENSG00000079819
ENSG00000130165	ENSG00000131171
ENSG00000011007	ENSG00000079819
ENSG00000154814	ENSG00000249242
ENSG00000187626	ENSG00000123119
ENSG00000214413	ENSG00000131171
ENSG00000165283	ENSG00000131171
ENSG00000152684	ENSG00000131171
ENSG00000118680	ENSG00000131171
ENSG00000035928	ENSG00000131171
ENSG00000204713	ENSG00000131171
ENSG00000137343	ENSG00000079819
ENSG00000182004	ENSG00000131171
ENSG00000138381	ENSG00000131171
ENSG00000163481	ENSG00000131171
ENSG00000091009	ENSG00000123119
ENSG00000142751	ENSG00000215039
ENSG00000182180	ENSG00000131171
ENSG00000137312	ENSG00000079819
ENSG00000198663	ENSG00000131171
ENSG00000100764	ENSG00000131171
ENSG00000145916	ENSG00000079819
ENSG00000164751	ENSG00000131171
ENSG00000139990	ENSG00000131171
ENSG00000114544	ENSG00000131171
ENSG00000163029	ENSG00000131171
ENSG00000008018	ENSG00000131171
ENSG00000134014	ENSG00000131171
ENSG00000163257	ENSG00000249242
ENSG00000144591	ENSG00000131171
ENSG00000151500	ENSG00000131171
ENSG00000117153	ENSG00000131171
ENSG00000145781	ENSG00000131171
ENSG00000248092	ENSG00000131171
ENSG00000121931	ENSG00000249242
ENSG00000129292	ENSG00000131171
ENSG00000172239	ENSG00000215039
ENSG00000135829	ENSG00000249242
ENSG00000058272	ENSG00000131171
ENSG00000144659	ENSG00000131171
ENSG00000168434	ENSG00000131171
ENSG00000182923	ENSG00000131171
ENSG00000067248	ENSG00000123119
ENSG00000204104	ENSG00000131171
ENSG00000134077	ENSG00000249242
ENSG00000165280	ENSG00000131171
ENSG00000162384	ENSG00000079819
ENSG00000163468	ENSG00000131171
ENSG00000138030	ENSG00000249242
ENSG00000116030	ENSG00000131171
ENSG00000153827	ENSG00000131171
ENSG00000114956	ENSG00000131171
ENSG00000157020	ENSG00000131171
ENSG00000081692	ENSG00000249242
ENSG00000196712	ENSG00000131171
ENSG00000108774	ENSG00000131171
ENSG00000116863	ENSG00000131171
ENSG00000204463	ENSG00000131171
ENSG00000172057	ENSG00000131171
ENSG00000115233	ENSG00000131171
ENSG00000182446	ENSG00000131171
ENSG00000163832	ENSG00000131171
ENSG00000055950	ENSG00000131171
ENSG00000143374	ENSG00000131171
ENSG00000116984	ENSG00000249242
ENSG00000258634	ENSG00000249242
ENSG00000156502	ENSG00000131171
ENSG00000176731	ENSG00000131171
ENSG00000172765	ENSG00000131171
ENSG00000106330	ENSG00000131171
ENSG00000135372	ENSG00000131171
ENSG00000117640	ENSG00000079819
ENSG00000131023	ENSG00000123119
ENSG00000143612	ENSG00000131171
ENSG00000063978	ENSG00000154447
ENSG00000117569	ENSG00000249242
ENSG00000104177	ENSG00000131171
ENSG00000089248	ENSG00000131171
ENSG00000104853	ENSG00000131171
ENSG00000023318	ENSG00000131171
ENSG00000171853	ENSG00000131171
ENSG00000177963	ENSG00000131171
ENSG00000180228	ENSG00000079819
ENSG00000221983	ENSG00000131171
ENSG00000054116	ENSG00000131171
ENSG00000105404	ENSG00000131171
ENSG00000170619	ENSG00000131171
ENSG00000143436	ENSG00000079819
ENSG00000111481	ENSG00000131171
ENSG00000175198	ENSG00000131171
ENSG00000163625	ENSG00000131171
ENSG00000111237	ENSG00000131171
ENSG00000135974	ENSG00000131171
ENSG00000043514	ENSG00000249242
ENSG00000158863	ENSG00000131171
ENSG00000105726	ENSG00000131171
ENSG00000036054	ENSG00000170017
ENSG00000157954	ENSG00000131171
ENSG00000185122	ENSG00000131171
ENSG00000132383	ENSG00000131171
ENSG00000100938	ENSG00000131171
ENSG00000162851	ENSG00000123119
ENSG00000171204	ENSG00000131171
ENSG00000142657	ENSG00000131171
ENSG00000215717	ENSG00000131171
ENSG00000129562	ENSG00000131171
ENSG00000152904	ENSG00000079819
ENSG00000131475	ENSG00000131171
ENSG00000135297	ENSG00000131171
ENSG00000254837	ENSG00000131171
ENSG00000204498	ENSG00000079819
ENSG00000160714	ENSG00000079819
ENSG00000132676	ENSG00000131171
ENSG00000146223	ENSG00000131171
ENSG00000205531	ENSG00000131171
ENSG00000126067	ENSG00000215039
ENSG00000107262	ENSG00000131171
ENSG00000144580	ENSG00000079819
ENSG00000198258	ENSG00000131171
ENSG00000152409	ENSG00000131171
ENSG00000101546	ENSG00000131171
ENSG00000113312	ENSG00000079819
ENSG00000168310	ENSG00000123119
ENSG00000178988	ENSG00000079819
ENSG00000028203	ENSG00000131171
ENSG00000163510	ENSG00000123119
ENSG00000138398	ENSG00000249242
ENSG00000136930	ENSG00000215039
ENSG00000016864	ENSG00000079819
ENSG00000135093	ENSG00000131171
ENSG00000133027	ENSG00000131171
ENSG00000204574	ENSG00000131171
ENSG00000196449	ENSG00000131171
ENSG00000108953	ENSG00000131171
ENSG00000061794	ENSG00000131171
ENSG00000135617	ENSG00000249242
ENSG00000011454	ENSG00000131171
ENSG00000163479	ENSG00000079819
ENSG00000204859	ENSG00000131171
ENSG00000146085	ENSG00000131171
ENSG00000082516	ENSG00000131171
ENSG00000144034	ENSG00000131171
ENSG00000135801	ENSG00000249242
ENSG00000107897	ENSG00000131171
ENSG00000169714	ENSG00000123119
ENSG00000106615	ENSG00000215039
ENSG00000121864	ENSG00000079819
ENSG00000143569	ENSG00000079819
ENSG00000084623	ENSG00000131171
ENSG00000188315	ENSG00000131171
ENSG00000168958	ENSG00000079819
ENSG00000103423	ENSG00000131171
ENSG00000136754	ENSG00000131171
ENSG00000140265	ENSG00000131171
ENSG00000074582	ENSG00000079819
ENSG00000163636	ENSG00000215039
ENSG00000170464	ENSG00000131171
ENSG00000128694	ENSG00000249242
ENSG00000109917	ENSG00000131171
ENSG00000137207	ENSG00000079819
ENSG00000135506	ENSG00000131171
ENSG00000176340	ENSG00000131171
ENSG00000106636	ENSG00000131171
ENSG00000064726	ENSG00000131171
ENSG00000174547	ENSG00000131171
ENSG00000124541	ENSG00000079819
ENSG00000163626	ENSG00000249242
ENSG00000166333	ENSG00000131171
ENSG00000136485	ENSG00000131171
ENSG00000132341	ENSG00000131171
ENSG00000242802	ENSG00000131171
ENSG00000115998	ENSG00000131171
ENSG00000056586	ENSG00000131171
ENSG00000079246	ENSG00000123119
ENSG00000196655	ENSG00000131171
ENSG00000009307	ENSG00000131171
ENSG00000103091	ENSG00000131171
ENSG00000074755	ENSG00000131171
ENSG00000163904	ENSG00000079819
ENSG00000211460	ENSG00000131171
ENSG00000077235	ENSG00000131171
ENSG00000160087	ENSG00000215039
ENSG00000204310	ENSG00000079819
ENSG00000141543	ENSG00000131171
ENSG00000159346	ENSG00000079819
ENSG00000138032	ENSG00000131171
ENSG00000169019	ENSG00000131171
ENSG00000135624	ENSG00000131171
ENSG00000114742	ENSG00000249242
ENSG00000174106	ENSG00000131171
ENSG00000180357	ENSG00000131171
ENSG00000168014	ENSG00000131171
ENSG00000108298	ENSG00000131171
ENSG00000116898	ENSG00000215039
ENSG00000105953	ENSG00000131171
ENSG00000144589	ENSG00000249242
ENSG00000183955	ENSG00000131171
ENSG00000153786	ENSG00000131171
ENSG00000171960	ENSG00000123119
ENSG00000144036	ENSG00000131171
ENSG00000213079	ENSG00000131171
ENSG00000175550	ENSG00000131171
ENSG00000132313	ENSG00000131171
ENSG00000003509	ENSG00000131171
ENSG00000174695	ENSG00000131171
ENSG00000143486	ENSG00000131171
ENSG00000143553	ENSG00000131171
ENSG00000176624	ENSG00000131171
ENSG00000178252	ENSG00000249242
ENSG00000126067	ENSG00000079819
ENSG00000055130	ENSG00000131171
ENSG00000157881	ENSG00000249242
ENSG00000235501	ENSG00000123119
ENSG00000128607	ENSG00000131171
ENSG00000089094	ENSG00000131171
ENSG00000057608	ENSG00000131171
ENSG00000178035	ENSG00000131171
ENSG00000205250	ENSG00000131171
ENSG00000197579	ENSG00000131171
ENSG00000177951	ENSG00000131171
ENSG00000127616	ENSG00000131171
ENSG00000170144	ENSG00000170017
ENSG00000164615	ENSG00000131171
ENSG00000177888	ENSG00000170017
ENSG00000181788	ENSG00000249242
ENSG00000110395	ENSG00000131171
ENSG00000160075	ENSG00000079819
ENSG00000129071	ENSG00000123119
ENSG00000145022	ENSG00000131171
ENSG00000072803	ENSG00000215039
ENSG00000137492	ENSG00000131171
ENSG00000137547	ENSG00000131171
ENSG00000266469	ENSG00000131171
ENSG00000116954	ENSG00000215039
ENSG00000115806	ENSG00000131171
ENSG00000204842	ENSG00000131171
ENSG00000168291	ENSG00000079819
ENSG00000161526	ENSG00000131171
ENSG00000153989	ENSG00000131171
ENSG00000010256	ENSG00000131171
ENSG00000233639	ENSG00000249242
ENSG00000142039	ENSG00000131171
ENSG00000124641	ENSG00000131171
ENSG00000064703	ENSG00000123119
ENSG00000170633	ENSG00000131171
ENSG00000136908	ENSG00000131171
ENSG00000163636	ENSG00000079819
ENSG00000148303	ENSG00000131171
ENSG00000168724	ENSG00000131171
ENSG00000135090	ENSG00000131171
ENSG00000120925	ENSG00000131171
ENSG00000161011	ENSG00000131171
ENSG00000105298	ENSG00000131171
ENSG00000113360	ENSG00000131171
ENSG00000031823	ENSG00000131171
ENSG00000124541	ENSG00000215039
ENSG00000171311	ENSG00000131171
ENSG00000153046	ENSG00000131171
ENSG00000134248	ENSG00000215039
ENSG00000188846	ENSG00000079819
ENSG00000130227	ENSG00000131171
ENSG00000134987	ENSG00000123119
ENSG00000181090	ENSG00000131171
ENSG00000082515	ENSG00000131171
ENSG00000158850	ENSG00000131171
ENSG00000172765	ENSG00000249242
ENSG00000158793	ENSG00000131171
ENSG00000109079	ENSG00000131171
ENSG00000132471	ENSG00000131171
ENSG00000244045	ENSG00000131171
ENSG00000116906	ENSG00000079819
ENSG00000111802	ENSG00000131171
ENSG00000198160	ENSG00000131171
ENSG00000145740	ENSG00000131171
ENSG00000113013	ENSG00000131171
ENSG00000136279	ENSG00000131171
ENSG00000198815	ENSG00000131171
ENSG00000135341	ENSG00000131171
ENSG00000163320	ENSG00000131171
ENSG00000156973	ENSG00000131171
ENSG00000167325	ENSG00000131171
ENSG00000175110	ENSG00000131171
ENSG00000186448	ENSG00000079819
ENSG00000164975	ENSG00000131171
ENSG00000166135	ENSG00000131171
ENSG00000070814	ENSG00000123119
ENSG00000183431	ENSG00000131171
ENSG00000114391	ENSG00000131171
ENSG00000144233	ENSG00000131171
ENSG00000126698	ENSG00000079819
ENSG00000151445	ENSG00000131171
ENSG00000166197	ENSG00000131171
ENSG00000133678	ENSG00000131171
ENSG00000196453	ENSG00000131171
ENSG00000160087	ENSG00000079819
ENSG00000137038	ENSG00000131171
ENSG00000127125	ENSG00000131171
ENSG00000103507	ENSG00000131171
ENSG00000213699	ENSG00000131171
ENSG00000115421	ENSG00000249242
ENSG00000166454	ENSG00000131171
ENSG00000108883	ENSG00000131171
ENSG00000179163	ENSG00000249242
ENSG00000103111	ENSG00000131171
ENSG00000211456	ENSG00000249242
ENSG00000164253	ENSG00000131171
ENSG00000131469	ENSG00000131171
ENSG00000119650	ENSG00000131171
ENSG00000068120	ENSG00000131171
ENSG00000125629	ENSG00000249242
ENSG00000085662	ENSG00000131171
ENSG00000179151	ENSG00000131171
ENSG00000120805	ENSG00000131171
ENSG00000167987	ENSG00000131171
ENSG00000165782	ENSG00000131171
ENSG00000103549	ENSG00000131171
ENSG00000179632	ENSG00000131171
ENSG00000060688	ENSG00000249242
ENSG00000166188	ENSG00000131171
ENSG00000205339	ENSG00000131171
ENSG00000163900	ENSG00000079819
ENSG00000170881	ENSG00000131171
ENSG00000164168	ENSG00000131171
ENSG00000180228	ENSG00000170017
ENSG00000204568	ENSG00000131171
ENSG00000158435	ENSG00000079819
ENSG00000108433	ENSG00000131171
ENSG00000117448	ENSG00000131171
ENSG00000119523	ENSG00000131171
ENSG00000141429	ENSG00000131171
ENSG00000169180	ENSG00000131171
ENSG00000119231	ENSG00000079819
ENSG00000084676	ENSG00000131171
ENSG00000091732	ENSG00000131171
ENSG00000221914	ENSG00000131171
ENSG00000115306	ENSG00000123119
ENSG00000109111	ENSG00000131171
ENSG00000145901	ENSG00000131171
ENSG00000119979	ENSG00000131171
ENSG00000144535	ENSG00000249242
ENSG00000092203	ENSG00000131171
ENSG00000124596	ENSG00000131171
ENSG00000099246	ENSG00000131171
ENSG00000135966	ENSG00000123119
ENSG00000129255	ENSG00000131171
ENSG00000186834	ENSG00000131171
ENSG00000182831	ENSG00000131171
ENSG00000128928	ENSG00000131171
ENSG00000163795	ENSG00000131171
ENSG00000150456	ENSG00000131171
ENSG00000177868	ENSG00000131171
ENSG00000081870	ENSG00000131171
ENSG00000167645	ENSG00000131171
ENSG00000137714	ENSG00000131171
ENSG00000167986	ENSG00000131171
ENSG00000137824	ENSG00000131171
ENSG00000136878	ENSG00000131171
ENSG00000143294	ENSG00000131171
ENSG00000137100	ENSG00000131171
ENSG00000240024	ENSG00000249242
ENSG00000012963	ENSG00000131171
ENSG00000041988	ENSG00000079819
ENSG00000182473	ENSG00000131171
ENSG00000143575	ENSG00000079819
ENSG00000164252	ENSG00000131171
ENSG00000145919	ENSG00000131171
ENSG00000089234	ENSG00000131171
ENSG00000203993	ENSG00000131171
ENSG00000100888	ENSG00000131171
ENSG00000175470	ENSG00000131171
ENSG00000119777	ENSG00000131171
ENSG00000029725	ENSG00000131171
ENSG00000113648	ENSG00000131171
ENSG00000116514	ENSG00000123119
ENSG00000185624	ENSG00000131171
ENSG00000054282	ENSG00000079819
ENSG00000249915	ENSG00000079819
ENSG00000186448	ENSG00000123119
ENSG00000160679	ENSG00000123119
ENSG00000124383	ENSG00000131171
ENSG00000198843	ENSG00000131171
ENSG00000090581	ENSG00000131171
ENSG00000165525	ENSG00000131171
ENSG00000115761	ENSG00000131171
ENSG00000117862	ENSG00000079819
ENSG00000124535	ENSG00000131171
ENSG00000111642	ENSG00000131171
ENSG00000133059	ENSG00000249242
ENSG00000139637	ENSG00000131171
ENSG00000109519	ENSG00000131171
ENSG00000017797	ENSG00000131171
ENSG00000074266	ENSG00000131171
ENSG00000008130	ENSG00000215039
ENSG00000163938	ENSG00000131171
ENSG00000084090	ENSG00000131171
ENSG00000204569	ENSG00000131171
ENSG00000067334	ENSG00000131171
ENSG00000146433	ENSG00000131171
ENSG00000149294	ENSG00000131171
ENSG00000163541	ENSG00000079819
ENSG00000198783	ENSG00000131171
ENSG00000170515	ENSG00000131171
ENSG00000180104	ENSG00000131171
ENSG00000120533	ENSG00000131171
ENSG00000163510	ENSG00000079819
ENSG00000241127	ENSG00000131171
ENSG00000165526	ENSG00000131171
ENSG00000106153	ENSG00000131171
ENSG00000169714	ENSG00000079819
ENSG00000138386	ENSG00000249242
ENSG00000163900	ENSG00000215039
ENSG00000119335	ENSG00000131171
ENSG00000183513	ENSG00000131171
ENSG00000126088	ENSG00000079819
ENSG00000143801	ENSG00000249242
ENSG00000075239	ENSG00000131171
ENSG00000090989	ENSG00000131171
ENSG00000134882	ENSG00000131171
ENSG00000234127	ENSG00000131171
ENSG00000115459	ENSG00000131171
ENSG00000204209	ENSG00000131171
ENSG00000185359	ENSG00000131171
ENSG00000164609	ENSG00000131171
ENSG00000167985	ENSG00000131171
ENSG00000130640	ENSG00000215039
ENSG00000101558	ENSG00000131171
ENSG00000165934	ENSG00000131171
ENSG00000174886	ENSG00000131171
ENSG00000124614	ENSG00000131171
ENSG00000136888	ENSG00000131171
ENSG00000237765	ENSG00000131171
ENSG00000145495	ENSG00000131171
ENSG00000185627	ENSG00000131171
ENSG00000130305	ENSG00000131171
ENSG00000169375	ENSG00000131171
ENSG00000171262	ENSG00000131171
ENSG00000197312	ENSG00000249242
ENSG00000144580	ENSG00000123119
ENSG00000105821	ENSG00000131171
ENSG00000177225	ENSG00000131171
ENSG00000169592	ENSG00000131171
ENSG00000103035	ENSG00000131171
ENSG00000136527	ENSG00000079819
ENSG00000041988	ENSG00000215039
ENSG00000164970	ENSG00000131171
ENSG00000136147	ENSG00000131171
ENSG00000112514	ENSG00000079819
ENSG00000092199	ENSG00000131171
ENSG00000185236	ENSG00000131171
ENSG00000126858	ENSG00000131171
ENSG00000144524	ENSG00000079819
ENSG00000135698	ENSG00000131171
ENSG00000137338	ENSG00000123119
ENSG00000090621	ENSG00000215039
ENSG00000143179	ENSG00000123119
ENSG00000167257	ENSG00000131171
ENSG00000109065	ENSG00000131171
ENSG00000108039	ENSG00000131171
ENSG00000111737	ENSG00000131171
ENSG00000176261	ENSG00000131171
ENSG00000116688	ENSG00000079819
ENSG00000126247	ENSG00000131171
ENSG00000150776	ENSG00000131171
ENSG00000139428	ENSG00000131171
ENSG00000106628	ENSG00000131171
ENSG00000146872	ENSG00000131171
ENSG00000240682	ENSG00000079819
ENSG00000103671	ENSG00000131171
ENSG00000135211	ENSG00000215039
ENSG00000138279	ENSG00000131171
ENSG00000187954	ENSG00000131171
ENSG00000143443	ENSG00000249242
ENSG00000110011	ENSG00000131171
ENSG00000169223	ENSG00000079819
ENSG00000143889	ENSG00000131171
ENSG00000272106	ENSG00000249242
ENSG00000145241	ENSG00000249242
ENSG00000167977	ENSG00000131171
ENSG00000117143	ENSG00000123119
ENSG00000091483	ENSG00000249242
ENSG00000167186	ENSG00000131171
ENSG00000125037	ENSG00000215039
ENSG00000088205	ENSG00000123119
ENSG00000008130	ENSG00000079819
ENSG00000174903	ENSG00000131171
ENSG00000115204	ENSG00000131171
ENSG00000133872	ENSG00000131171
ENSG00000198586	ENSG00000131171
ENSG00000095139	ENSG00000131171
ENSG00000179152	ENSG00000131171
ENSG00000087111	ENSG00000131171
ENSG00000170871	ENSG00000131171
ENSG00000170448	ENSG00000249242
ENSG00000120451	ENSG00000131171
ENSG00000189339	ENSG00000249242
ENSG00000168374	ENSG00000131171
ENSG00000119844	ENSG00000170017
ENSG00000184677	ENSG00000131171
ENSG00000198663	ENSG00000079819
ENSG00000137312	ENSG00000131171
ENSG00000145916	ENSG00000131171
ENSG00000131467	ENSG00000131171
ENSG00000198612	ENSG00000131171
ENSG00000034713	ENSG00000131171
ENSG00000137343	ENSG00000131171
ENSG00000107949	ENSG00000131171
ENSG00000154122	ENSG00000131171
ENSG00000102910	ENSG00000131171
ENSG00000138069	ENSG00000131171
ENSG00000129128	ENSG00000131171
ENSG00000114744	ENSG00000123119
ENSG00000164040	ENSG00000131171
ENSG00000103275	ENSG00000131171
ENSG00000006744	ENSG00000131171
ENSG00000119596	ENSG00000131171
ENSG00000128731	ENSG00000131171
ENSG00000151366	ENSG00000131171
ENSG00000162642	ENSG00000131171
ENSG00000140350	ENSG00000131171
ENSG00000056050	ENSG00000131171
ENSG00000131148	ENSG00000131171
ENSG00000159202	ENSG00000131171
ENSG00000138386	ENSG00000123119
ENSG00000115241	ENSG00000131171
ENSG00000103429	ENSG00000131171
ENSG00000143543	ENSG00000131171
ENSG00000167130	ENSG00000131171
ENSG00000145216	ENSG00000079819
ENSG00000119616	ENSG00000131171
ENSG00000169217	ENSG00000131171
ENSG00000117118	ENSG00000079819
ENSG00000171490	ENSG00000131171
ENSG00000149716	ENSG00000131171
ENSG00000131558	ENSG00000131171
ENSG00000108671	ENSG00000131171
ENSG00000164576	ENSG00000131171
ENSG00000084693	ENSG00000131171
ENSG00000135249	ENSG00000123119
ENSG00000004142	ENSG00000131171
ENSG00000119321	ENSG00000131171
ENSG00000115233	ENSG00000215039
ENSG00000140463	ENSG00000131171
ENSG00000165609	ENSG00000131171
ENSG00000174748	ENSG00000131171
ENSG00000136827	ENSG00000131171
ENSG00000172939	ENSG00000079819
ENSG00000164934	ENSG00000131171
ENSG00000103274	ENSG00000131171
ENSG00000118046	ENSG00000131171
ENSG00000105698	ENSG00000131171
ENSG00000094880	ENSG00000123119
ENSG00000066044	ENSG00000131171
ENSG00000170291	ENSG00000131171
ENSG00000186020	ENSG00000131171
ENSG00000184840	ENSG00000079819
ENSG00000170315	ENSG00000131171
ENSG00000075914	ENSG00000131171
ENSG00000090432	ENSG00000079819
ENSG00000136238	ENSG00000131171
ENSG00000111843	ENSG00000131171
ENSG00000100902	ENSG00000131171
ENSG00000138286	ENSG00000131171
ENSG00000122565	ENSG00000131171
ENSG00000167397	ENSG00000131171
ENSG00000100632	ENSG00000131171
ENSG00000147955	ENSG00000131171
ENSG00000104907	ENSG00000131171
ENSG00000131495	ENSG00000131171
ENSG00000119760	ENSG00000131171
ENSG00000141699	ENSG00000131171
ENSG00000254999	ENSG00000079819
ENSG00000114742	ENSG00000079819
ENSG00000136270	ENSG00000131171
ENSG00000140694	ENSG00000131171
ENSG00000214022	ENSG00000131171
ENSG00000132275	ENSG00000131171
ENSG00000132286	ENSG00000131171
ENSG00000172239	ENSG00000131171
ENSG00000105705	ENSG00000131171
ENSG00000142687	ENSG00000131171
ENSG00000144659	ENSG00000215039
ENSG00000117475	ENSG00000249242
ENSG00000165055	ENSG00000131171
ENSG00000105518	ENSG00000131171
ENSG00000164054	ENSG00000170017
ENSG00000143376	ENSG00000079819
ENSG00000010810	ENSG00000131171
ENSG00000168303	ENSG00000123119
ENSG00000170037	ENSG00000131171
ENSG00000141551	ENSG00000131171
ENSG00000136628	ENSG00000131171
ENSG00000148297	ENSG00000131171
ENSG00000138802	ENSG00000079819
ENSG00000179010	ENSG00000079819
ENSG00000115317	ENSG00000079819
ENSG00000204536	ENSG00000131171
ENSG00000101752	ENSG00000131171
ENSG00000183684	ENSG00000131171
ENSG00000128595	ENSG00000131171
ENSG00000153767	ENSG00000131171
ENSG00000113048	ENSG00000131171
ENSG00000107874	ENSG00000131171
ENSG00000149100	ENSG00000131171
ENSG00000146066	ENSG00000131171
ENSG00000114030	ENSG00000249242
ENSG00000090615	ENSG00000131171
ENSG00000146834	ENSG00000255248
ENSG00000135823	ENSG00000131171
ENSG00000174915	ENSG00000131171
ENSG00000143436	ENSG00000131171
ENSG00000127463	ENSG00000249242
ENSG00000137947	ENSG00000131171
ENSG00000204564	ENSG00000131171
ENSG00000074201	ENSG00000215039
ENSG00000232559	ENSG00000123119
ENSG00000248333	ENSG00000131171
ENSG00000099804	ENSG00000131171
ENSG00000155329	ENSG00000131171
ENSG00000179091	ENSG00000131171
ENSG00000133835	ENSG00000131171
ENSG00000054965	ENSG00000131171
ENSG00000136875	ENSG00000131171
ENSG00000107223	ENSG00000131171
ENSG00000149541	ENSG00000131171
ENSG00000060688	ENSG00000123119
ENSG00000054116	ENSG00000079819
ENSG00000178952	ENSG00000131171
ENSG00000148358	ENSG00000131171
ENSG00000143612	ENSG00000079819
ENSG00000204178	ENSG00000170017
ENSG00000245937	ENSG00000131171
ENSG00000117640	ENSG00000131171
ENSG00000117054	ENSG00000131171
ENSG00000167522	ENSG00000131171
ENSG00000170502	ENSG00000131171
ENSG00000156650	ENSG00000131171
ENSG00000163527	ENSG00000131171
ENSG00000118600	ENSG00000131171
ENSG00000182973	ENSG00000079819
ENSG00000087157	ENSG00000131171
ENSG00000204463	ENSG00000079819
ENSG00000249673	ENSG00000249242
ENSG00000186432	ENSG00000131171
ENSG00000185238	ENSG00000131171
ENSG00000163291	ENSG00000123119
ENSG00000170035	ENSG00000131171
ENSG00000163485	ENSG00000123119
ENSG00000075089	ENSG00000131171
ENSG00000124383	ENSG00000170017
ENSG00000086475	ENSG00000131171
ENSG00000153827	ENSG00000079819
ENSG00000130313	ENSG00000131171
ENSG00000132463	ENSG00000131171
ENSG00000144827	ENSG00000131171
ENSG00000162384	ENSG00000131171
ENSG00000132432	ENSG00000131171
ENSG00000115053	ENSG00000170017
ENSG00000131238	ENSG00000131171
ENSG00000132300	ENSG00000131171
ENSG00000184840	ENSG00000215039
ENSG00000157020	ENSG00000079819
ENSG00000146834	ENSG00000131171
ENSG00000223501	ENSG00000131171
ENSG00000132485	ENSG00000170017
ENSG00000144659	ENSG00000079819
ENSG00000124571	ENSG00000131171
ENSG00000060762	ENSG00000131171
ENSG00000087302	ENSG00000131171
ENSG00000165416	ENSG00000131171
ENSG00000109445	ENSG00000123119
ENSG00000104823	ENSG00000131171
ENSG00000146109	ENSG00000131171
ENSG00000141034	ENSG00000131171
ENSG00000115652	ENSG00000131171
ENSG00000105669	ENSG00000131171
ENSG00000167395	ENSG00000131171
ENSG00000141867	ENSG00000131171
ENSG00000116514	ENSG00000249242
ENSG00000086065	ENSG00000131171
ENSG00000103544	ENSG00000131171
ENSG00000132906	ENSG00000131171
ENSG00000043093	ENSG00000131171
ENSG00000123992	ENSG00000131171
ENSG00000153201	ENSG00000131171
ENSG00000156599	ENSG00000131171
ENSG00000136715	ENSG00000131171
ENSG00000093183	ENSG00000131171
ENSG00000175826	ENSG00000131171
ENSG00000108344	ENSG00000131171
ENSG00000074071	ENSG00000131171
ENSG00000115289	ENSG00000123119
ENSG00000112685	ENSG00000079819
ENSG00000197858	ENSG00000131171
ENSG00000145191	ENSG00000215039
ENSG00000041357	ENSG00000131171
ENSG00000048544	ENSG00000131171
ENSG00000125445	ENSG00000131171
ENSG00000139343	ENSG00000131171
ENSG00000141504	ENSG00000131171
ENSG00000229117	ENSG00000131171
ENSG00000204178	ENSG00000122378
ENSG00000143575	ENSG00000154447
ENSG00000145780	ENSG00000123119
ENSG00000176087	ENSG00000131171
ENSG00000167721	ENSG00000131171
ENSG00000161970	ENSG00000131171
ENSG00000092931	ENSG00000131171
ENSG00000008952	ENSG00000131171
ENSG00000152242	ENSG00000131171
ENSG00000168002	ENSG00000131171
ENSG00000122643	ENSG00000131171
ENSG00000169016	ENSG00000131171
ENSG00000151332	ENSG00000131171
ENSG00000119203	ENSG00000131171
ENSG00000170088	ENSG00000131171
ENSG00000110536	ENSG00000131171
ENSG00000128973	ENSG00000131171
ENSG00000063322	ENSG00000131171
ENSG00000136021	ENSG00000131171
ENSG00000116406	ENSG00000131171
ENSG00000116212	ENSG00000131171
ENSG00000036549	ENSG00000131171
ENSG00000166797	ENSG00000131171
ENSG00000127774	ENSG00000131171
ENSG00000107175	ENSG00000215039
ENSG00000170266	ENSG00000131171
ENSG00000060642	ENSG00000131171
ENSG00000085231	ENSG00000131171
ENSG00000185803	ENSG00000215039
ENSG00000110048	ENSG00000131171
ENSG00000083544	ENSG00000131171
ENSG00000066654	ENSG00000131171
ENSG00000164258	ENSG00000131171
ENSG00000116288	ENSG00000079819
ENSG00000204435	ENSG00000079819
ENSG00000144136	ENSG00000249242
ENSG00000168883	ENSG00000079819
ENSG00000160058	ENSG00000131171
ENSG00000067704	ENSG00000249242
ENSG00000065518	ENSG00000079819
ENSG00000115234	ENSG00000079819
ENSG00000204356	ENSG00000079819
ENSG00000137574	ENSG00000123119
ENSG00000135829	ENSG00000170017
ENSG00000159596	ENSG00000131171
ENSG00000176102	ENSG00000131171
ENSG00000108468	ENSG00000131171
ENSG00000105677	ENSG00000131171
ENSG00000109919	ENSG00000131171
ENSG00000114767	ENSG00000131171
ENSG00000059573	ENSG00000131171
ENSG00000105700	ENSG00000131171
ENSG00000107021	ENSG00000131171
ENSG00000185104	ENSG00000131171
ENSG00000168256	ENSG00000131171
ENSG00000151276	ENSG00000249242
ENSG00000075785	ENSG00000079819
ENSG00000122203	ENSG00000131171
ENSG00000166529	ENSG00000131171
ENSG00000086619	ENSG00000123119
ENSG00000170473	ENSG00000131171
ENSG00000244038	ENSG00000079819
ENSG00000198730	ENSG00000131171
ENSG00000075142	ENSG00000131171
ENSG00000102753	ENSG00000131171
ENSG00000110711	ENSG00000215039
ENSG00000100883	ENSG00000131171
ENSG00000133028	ENSG00000131171
ENSG00000168818	ENSG00000131171
ENSG00000149547	ENSG00000131171
ENSG00000171953	ENSG00000131171
ENSG00000169131	ENSG00000131171
ENSG00000116521	ENSG00000131171
ENSG00000163159	ENSG00000079819
ENSG00000104299	ENSG00000131171
ENSG00000166855	ENSG00000131171
ENSG00000091164	ENSG00000131171
ENSG00000089022	ENSG00000131171
ENSG00000118873	ENSG00000249242
ENSG00000182134	ENSG00000249242
ENSG00000166734	ENSG00000131171
ENSG00000104660	ENSG00000131171
ENSG00000109536	ENSG00000123119
ENSG00000152133	ENSG00000131171
ENSG00000117614	ENSG00000131171
ENSG00000135801	ENSG00000123119
ENSG00000198925	ENSG00000131171
ENSG00000152601	ENSG00000131171
ENSG00000169599	ENSG00000131171
ENSG00000023734	ENSG00000131171
ENSG00000197136	ENSG00000131171
ENSG00000167333	ENSG00000131171
ENSG00000006712	ENSG00000131171
ENSG00000105556	ENSG00000131171
ENSG00000112576	ENSG00000131171
ENSG00000124279	ENSG00000123119
ENSG00000160783	ENSG00000131171
ENSG00000125734	ENSG00000131171
ENSG00000116062	ENSG00000123119
ENSG00000127837	ENSG00000079819
ENSG00000114354	ENSG00000079819
ENSG00000173141	ENSG00000131171
ENSG00000183291	ENSG00000131171
ENSG00000187555	ENSG00000131171
ENSG00000179912	ENSG00000131171
ENSG00000182544	ENSG00000131171
ENSG00000100461	ENSG00000131171
ENSG00000168802	ENSG00000131171
ENSG00000177879	ENSG00000131171
ENSG00000074319	ENSG00000131171
ENSG00000176715	ENSG00000131171
ENSG00000176101	ENSG00000131171
ENSG00000186222	ENSG00000131171
ENSG00000168924	ENSG00000131171
ENSG00000135900	ENSG00000131171
ENSG00000088247	ENSG00000099308
ENSG00000109118	ENSG00000131171
ENSG00000144021	ENSG00000131171
ENSG00000142864	ENSG00000131171
ENSG00000058729	ENSG00000131171
ENSG00000140307	ENSG00000131171
ENSG00000166971	ENSG00000131171
ENSG00000169727	ENSG00000131171
ENSG00000110321	ENSG00000131171
ENSG00000112584	ENSG00000131171
ENSG00000183520	ENSG00000079819
ENSG00000135624	ENSG00000170017
ENSG00000136710	ENSG00000131171
ENSG00000110442	ENSG00000131171
ENSG00000198399	ENSG00000131171
ENSG00000100823	ENSG00000131171
ENSG00000198000	ENSG00000131171
ENSG00000167363	ENSG00000131171
ENSG00000170296	ENSG00000131171
ENSG00000161202	ENSG00000131171
ENSG00000023228	ENSG00000249242
ENSG00000115677	ENSG00000079819
ENSG00000062725	ENSG00000131171
ENSG00000103148	ENSG00000131171
ENSG00000060971	ENSG00000131171
ENSG00000142784	ENSG00000215039
ENSG00000179262	ENSG00000131171
ENSG00000110801	ENSG00000131171
ENSG00000114745	ENSG00000079819
ENSG00000015532	ENSG00000131171
ENSG00000035115	ENSG00000131171
ENSG00000112167	ENSG00000131171
ENSG00000078618	ENSG00000079819
ENSG00000143390	ENSG00000249242
ENSG00000213337	ENSG00000249242
ENSG00000162517	ENSG00000079819
ENSG00000091527	ENSG00000131171
ENSG00000075785	ENSG00000215039
ENSG00000122218	ENSG00000131171
ENSG00000132305	ENSG00000131171
ENSG00000084463	ENSG00000131171
ENSG00000022840	ENSG00000131171
ENSG00000214087	ENSG00000131171
ENSG00000007923	ENSG00000249242
ENSG00000099800	ENSG00000131171
ENSG00000197498	ENSG00000215039
ENSG00000198373	ENSG00000131171
ENSG00000113384	ENSG00000131171
ENSG00000204560	ENSG00000131171
ENSG00000163785	ENSG00000131171
ENSG00000094880	ENSG00000079819
ENSG00000088682	ENSG00000131171ENSG00000079819	ENSG00000148229
ENSG00000249242	ENSG00000070540
ENSG00000079819	ENSG00000146576
ENSG00000079819	ENSG00000132591
ENSG00000249242	ENSG00000123130
ENSG00000123119	ENSG00000126226
ENSG00000079819	ENSG00000087302
ENSG00000079819	ENSG00000122033
ENSG00000079819	ENSG00000198752
ENSG00000079819	ENSG00000169740
ENSG00000249242	ENSG00000106603
ENSG00000079819	ENSG00000069998
ENSG00000079819	ENSG00000029364
ENSG00000170017	ENSG00000166266
ENSG00000079819	ENSG00000105705
ENSG00000079819	ENSG00000140259
ENSG00000079819	ENSG00000074842
ENSG00000123119	ENSG00000042429
ENSG00000249242	ENSG00000140044
ENSG00000079819	ENSG00000161526
ENSG00000079819	ENSG00000058600
ENSG00000249242	ENSG00000163312
ENSG00000123119	ENSG00000064607
ENSG00000249242	ENSG00000037757
ENSG00000249242	ENSG00000175216
ENSG00000079819	ENSG00000215021
ENSG00000079819	ENSG00000133704
ENSG00000123119	ENSG00000272779
ENSG00000249242	ENSG00000185127
ENSG00000079819	ENSG00000161057
ENSG00000249242	ENSG00000175203
ENSG00000249242	ENSG00000095485
ENSG00000079819	ENSG00000108591
ENSG00000079819	ENSG00000123728
ENSG00000249242	ENSG00000109323
ENSG00000123119	ENSG00000102781
ENSG00000079819	ENSG00000187713
ENSG00000249242	ENSG00000110048
ENSG00000079819	ENSG00000063244
ENSG00000249242	ENSG00000102316
ENSG00000249242	ENSG00000110060
ENSG00000249242	ENSG00000166848
ENSG00000079819	ENSG00000147457
ENSG00000123119	ENSG00000068438
ENSG00000079819	ENSG00000132792
ENSG00000079819	ENSG00000125991
ENSG00000123119	ENSG00000105401
ENSG00000079819	ENSG00000149136
ENSG00000249242	ENSG00000164244
ENSG00000079819	ENSG00000166855
ENSG00000079819	ENSG00000205423
ENSG00000123119	ENSG00000103066
ENSG00000079819	ENSG00000100722
ENSG00000079819	ENSG00000196998
ENSG00000079819	ENSG00000137824
ENSG00000079819	ENSG00000108424
ENSG00000079819	ENSG00000165637
ENSG00000123119	ENSG00000172270
ENSG00000249242	ENSG00000104177
ENSG00000079819	ENSG00000175550
ENSG00000249242	ENSG00000172977
ENSG00000079819	ENSG00000108587
ENSG00000123119	ENSG00000165526
ENSG00000079819	ENSG00000125818
ENSG00000249242	ENSG00000006576
ENSG00000123119	ENSG00000049769
ENSG00000079819	ENSG00000119689
ENSG00000249242	ENSG00000262049
ENSG00000123119	ENSG00000136816
ENSG00000249242	ENSG00000128891
ENSG00000249242	ENSG00000164331
ENSG00000079819	ENSG00000133935
ENSG00000079819	ENSG00000131475
ENSG00000249242	ENSG00000170185
ENSG00000249242	ENSG00000109320
ENSG00000249242	ENSG00000119899
ENSG00000215039	ENSG00000178127
ENSG00000079819	ENSG00000167182
ENSG00000079819	ENSG00000186591
ENSG00000249242	ENSG00000078687
ENSG00000249242	ENSG00000185722
ENSG00000249242	ENSG00000011143
ENSG00000249242	ENSG00000065615
ENSG00000123119	ENSG00000172661
ENSG00000249242	ENSG00000250616
ENSG00000079819	ENSG00000106636
ENSG00000079819	ENSG00000150316
ENSG00000079819	ENSG00000166887
ENSG00000079819	ENSG00000241258
ENSG00000079819	ENSG00000126247
ENSG00000079819	ENSG00000158941
ENSG00000123119	ENSG00000047621
ENSG00000249242	ENSG00000128513
ENSG00000079819	ENSG00000175390
ENSG00000249242	ENSG00000070778
ENSG00000249242	ENSG00000066654
ENSG00000249242	ENSG00000127191
ENSG00000215039	ENSG00000184575
ENSG00000079819	ENSG00000121058
ENSG00000123119	ENSG00000148843
ENSG00000123119	ENSG00000178764
ENSG00000123119	ENSG00000059769
ENSG00000079819	ENSG00000101997
ENSG00000079819	ENSG00000159256
ENSG00000079819	ENSG00000071243
ENSG00000249242	ENSG00000101546
ENSG00000249242	ENSG00000234545
ENSG00000079819	ENSG00000110871
ENSG00000123119	ENSG00000107371
ENSG00000215039	ENSG00000174282
ENSG00000079819	ENSG00000146834
ENSG00000079819	ENSG00000103429
ENSG00000123119	ENSG00000151491
ENSG00000249242	ENSG00000138107
ENSG00000079819	ENSG00000111011
ENSG00000249242	ENSG00000067365
ENSG00000249242	ENSG00000181192
ENSG00000249242	ENSG00000106638
ENSG00000079819	ENSG00000103549
ENSG00000249242	ENSG00000136738
ENSG00000249242	ENSG00000165406
ENSG00000249242	ENSG00000131725
ENSG00000249242	ENSG00000256060
ENSG00000079819	ENSG00000074266
ENSG00000249242	ENSG00000112473
ENSG00000123119	ENSG00000108651
ENSG00000249242	ENSG00000264575
ENSG00000249242	ENSG00000131269
ENSG00000249242	ENSG00000076650
ENSG00000249242	ENSG00000096968
ENSG00000079819	ENSG00000198231
ENSG00000079819	ENSG00000147123
ENSG00000249242	ENSG00000089876
ENSG00000079819	ENSG00000054611
ENSG00000079819	ENSG00000065427
ENSG00000249242	ENSG00000099330
ENSG00000079819	ENSG00000070770
ENSG00000123119	ENSG00000107951
ENSG00000123119	ENSG00000129460
ENSG00000079819	ENSG00000130803
ENSG00000079819	ENSG00000100056
ENSG00000249242	ENSG00000198589
ENSG00000215039	ENSG00000160633
ENSG00000079819	ENSG00000121067
ENSG00000249242	ENSG00000164134
ENSG00000249242	ENSG00000111554
ENSG00000079819	ENSG00000239900
ENSG00000123119	ENSG00000126814
ENSG00000249242	ENSG00000089916
ENSG00000249242	ENSG00000159921
ENSG00000170017	ENSG00000122958
ENSG00000215039	ENSG00000103035
ENSG00000249242	ENSG00000182670
ENSG00000079819	ENSG00000172775
ENSG00000079819	ENSG00000126457
ENSG00000079819	ENSG00000153786
ENSG00000249242	ENSG00000065029
ENSG00000249242	ENSG00000198832
ENSG00000079819	ENSG00000196419
ENSG00000079819	ENSG00000204316
ENSG00000079819	ENSG00000137770
ENSG00000215039	ENSG00000185721
ENSG00000170017	ENSG00000185728
ENSG00000123119	ENSG00000102974
ENSG00000079819	ENSG00000136485
ENSG00000123119	ENSG00000180787
ENSG00000249242	ENSG00000171262
ENSG00000249242	ENSG00000134058
ENSG00000079819	ENSG00000138279
ENSG00000249242	ENSG00000166681
ENSG00000249242	ENSG00000170791
ENSG00000215039	ENSG00000142444
ENSG00000079819	ENSG00000100902
ENSG00000249242	ENSG00000189308
ENSG00000249242	ENSG00000173273
ENSG00000079819	ENSG00000160953
ENSG00000123119	ENSG00000172465
ENSG00000079819	ENSG00000079999
ENSG00000079819	ENSG00000135211
ENSG00000079819	ENSG00000025770
ENSG00000249242	ENSG00000185730
ENSG00000079819	ENSG00000177963
ENSG00000249242	ENSG00000187866
ENSG00000079819	ENSG00000132581
ENSG00000249242	ENSG00000173065
ENSG00000079819	ENSG00000182518
ENSG00000249242	ENSG00000039123
ENSG00000249242	ENSG00000140386
ENSG00000079819	ENSG00000105438
ENSG00000079819	ENSG00000164944
ENSG00000079819	ENSG00000105404
ENSG00000123119	ENSG00000111364
ENSG00000249242	ENSG00000182986
ENSG00000249242	ENSG00000025293
ENSG00000249242	ENSG00000157349
ENSG00000249242	ENSG00000075856
ENSG00000249242	ENSG00000003056
ENSG00000079819	ENSG00000075336
ENSG00000079819	ENSG00000101266
ENSG00000215039	ENSG00000176619
ENSG00000079819	ENSG00000151445
ENSG00000079819	ENSG00000178982
ENSG00000079819	ENSG00000102974
ENSG00000079819	ENSG00000100811
ENSG00000249242	ENSG00000198464
ENSG00000249242	ENSG00000132670
ENSG00000123119	ENSG00000103199
ENSG00000249242	ENSG00000107185
ENSG00000079819	ENSG00000184708
ENSG00000249242	ENSG00000196850
ENSG00000079819	ENSG00000130520
ENSG00000249242	ENSG00000140543
ENSG00000079819	ENSG00000133983
ENSG00000079819	ENSG00000099942
ENSG00000249242	ENSG00000005022
ENSG00000079819	ENSG00000110801
ENSG00000079819	ENSG00000131165
ENSG00000249242	ENSG00000112576
ENSG00000249242	ENSG00000095380
ENSG00000079819	ENSG00000148303
ENSG00000079819	ENSG00000100353
ENSG00000249242	ENSG00000198840
ENSG00000079819	ENSG00000100347
ENSG00000079819	ENSG00000090581
ENSG00000079819	ENSG00000198888
ENSG00000249242	ENSG00000177885
ENSG00000249242	ENSG00000089597
ENSG00000079819	ENSG00000119414
ENSG00000249242	ENSG00000186868
ENSG00000249242	ENSG00000101654
ENSG00000249242	ENSG00000178397
ENSG00000079819	ENSG00000123159
ENSG00000079819	ENSG00000170515
ENSG00000249242	ENSG00000044446
ENSG00000079819	ENSG00000129460
ENSG00000079819	ENSG00000198730
ENSG00000249242	ENSG00000186908
ENSG00000249242	ENSG00000101442
ENSG00000079819	ENSG00000133606
ENSG00000079819	ENSG00000123415
ENSG00000079819	ENSG00000149182
ENSG00000079819	ENSG00000149196
ENSG00000079819	ENSG00000119979
ENSG00000123119	ENSG00000006194
ENSG00000249242	ENSG00000078142
ENSG00000215039	ENSG00000124214
ENSG00000249242	ENSG00000135040
ENSG00000152137	ENSG00000111786
ENSG00000249242	ENSG00000259877
ENSG00000079819	ENSG00000132254
ENSG00000079819	ENSG00000074201
ENSG00000154447	ENSG00000164654
ENSG00000249242	ENSG00000250462
ENSG00000154447	ENSG00000172977
ENSG00000079819	ENSG00000100796
ENSG00000079819	ENSG00000137106
ENSG00000079819	ENSG00000106244
ENSG00000079819	ENSG00000149547
ENSG00000079819	ENSG00000167862
ENSG00000079819	ENSG00000198646
ENSG00000249242	ENSG00000148444
ENSG00000249242	ENSG00000135108
ENSG00000079819	ENSG00000106052
ENSG00000249242	ENSG00000085185
ENSG00000079819	ENSG00000136146
ENSG00000249242	ENSG00000103479
ENSG00000079819	ENSG00000136152
ENSG00000170017	ENSG00000122068
ENSG00000249242	ENSG00000091127
ENSG00000249242	ENSG00000014138
ENSG00000079819	ENSG00000099940
ENSG00000215039	ENSG00000103051
ENSG00000249242	ENSG00000198894
ENSG00000249242	ENSG00000101290
ENSG00000123119	ENSG00000172992
ENSG00000079819	ENSG00000214174
ENSG00000154447	ENSG00000168872
ENSG00000249242	ENSG00000168795
ENSG00000249242	ENSG00000104129
ENSG00000170017	ENSG00000155975
ENSG00000249242	ENSG00000138613
ENSG00000249242	ENSG00000134001
ENSG00000249242	ENSG00000154124
ENSG00000079819	ENSG00000198900
ENSG00000249242	ENSG00000119965
ENSG00000123119	ENSG00000108384
ENSG00000249242	ENSG00000141298
ENSG00000079819	ENSG00000106682
ENSG00000249242	ENSG00000106460
ENSG00000249242	ENSG00000164597
ENSG00000249242	ENSG00000137871
ENSG00000249242	ENSG00000112367
ENSG00000079819	ENSG00000148248
ENSG00000249242	ENSG00000135045
ENSG00000079819	ENSG00000019995
ENSG00000079819	ENSG00000179091
ENSG00000170017	ENSG00000131165
ENSG00000079819	ENSG00000127884
ENSG00000215039	ENSG00000125870
ENSG00000079819	ENSG00000153485
ENSG00000249242	ENSG00000164975
ENSG00000215039	ENSG00000101246
ENSG00000249242	ENSG00000152223
ENSG00000079819	ENSG00000169057
ENSG00000215039	ENSG00000213995
ENSG00000249242	ENSG00000085382
ENSG00000249242	ENSG00000164168
ENSG00000249242	ENSG00000167461
ENSG00000249242	ENSG00000131828
ENSG00000249242	ENSG00000120925
ENSG00000079819	ENSG00000130724
ENSG00000079819	ENSG00000136816
ENSG00000079819	ENSG00000031823
ENSG00000079819	ENSG00000161999
ENSG00000079819	ENSG00000171552
ENSG00000123119	ENSG00000108021
ENSG00000079819	ENSG00000205531
ENSG00000249242	ENSG00000007168
ENSG00000215039	ENSG00000160294
ENSG00000123119	ENSG00000111203
ENSG00000249242	ENSG00000102763
ENSG00000079819	ENSG00000104872
ENSG00000079819	ENSG00000165283
ENSG00000249242	ENSG00000167110
ENSG00000170017	ENSG00000165119
ENSG00000123119	ENSG00000178921
ENSG00000079819	ENSG00000048649
ENSG00000079819	ENSG00000178952
ENSG00000123119	ENSG00000108587
ENSG00000079819	ENSG00000108523
ENSG00000079819	ENSG00000108443
ENSG00000079819	ENSG00000132522
ENSG00000170017	ENSG00000129071
ENSG00000249242	ENSG00000185963
ENSG00000249242	ENSG00000167716
ENSG00000079819	ENSG00000013275
ENSG00000249242	ENSG00000205659
ENSG00000249242	ENSG00000198918
ENSG00000215039	ENSG00000101084
ENSG00000249242	ENSG00000164209
ENSG00000249242	ENSG00000124177
ENSG00000249242	ENSG00000101452
ENSG00000123119	ENSG00000149136
ENSG00000215039	ENSG00000159210
ENSG00000249242	ENSG00000070718
ENSG00000249242	ENSG00000197183
ENSG00000154447	ENSG00000149930
ENSG00000123119	ENSG00000175354
ENSG00000249242	ENSG00000092010
ENSG00000079819	ENSG00000102030
ENSG00000079819	ENSG00000149541
ENSG00000079819	ENSG00000150776
ENSG00000079819	ENSG00000137074
ENSG00000249242	ENSG00000223501
ENSG00000079819	ENSG00000112592
ENSG00000079819	ENSG00000148688
ENSG00000170017	ENSG00000165494
ENSG00000123119	ENSG00000165219
ENSG00000249242	ENSG00000107625
ENSG00000170017	ENSG00000164985
ENSG00000249242	ENSG00000112200
ENSG00000123119	ENSG00000058600
ENSG00000079819	ENSG00000131148
ENSG00000249242	ENSG00000062725
ENSG00000215039	ENSG00000132507
ENSG00000249242	ENSG00000205060
ENSG00000079819	ENSG00000079332
ENSG00000079819	ENSG00000167118
ENSG00000079819	ENSG00000166548
ENSG00000079819	ENSG00000042429
ENSG00000123119	ENSG00000166261
ENSG00000079819	ENSG00000107175
ENSG00000079819	ENSG00000131558
ENSG00000249242	ENSG00000168803
ENSG00000249242	ENSG00000154122
ENSG00000249242	ENSG00000156709
ENSG00000249242	ENSG00000108852
ENSG00000079819	ENSG00000108468
ENSG00000249242	ENSG00000012822
ENSG00000079819	ENSG00000126226
ENSG00000079819	ENSG00000166170
ENSG00000249242	ENSG00000111640
ENSG00000249242	ENSG00000126775
ENSG00000079819	ENSG00000087365
ENSG00000249242	ENSG00000148090
ENSG00000123119	ENSG00000122741
ENSG00000249242	ENSG00000198900
ENSG00000123119	ENSG00000066654
ENSG00000079819	ENSG00000147164
ENSG00000215039	ENSG00000142166
ENSG00000249242	ENSG00000103249
ENSG00000079819	ENSG00000099817
ENSG00000249242	ENSG00000106682
ENSG00000079819	ENSG00000128789
ENSG00000079819	ENSG00000139684
ENSG00000215039	ENSG00000178761
ENSG00000079819	ENSG00000242259
ENSG00000249242	ENSG00000112146
ENSG00000152137	ENSG00000125818
ENSG00000079819	ENSG00000137656
ENSG00000079819	ENSG00000100603
ENSG00000249242	ENSG00000197951
ENSG00000249242	ENSG00000086848
ENSG00000079819	ENSG00000187778
ENSG00000079819	ENSG00000157954
ENSG00000123119	ENSG00000107651
ENSG00000079819	ENSG00000086102
ENSG00000079819	ENSG00000136819
ENSG00000249242	ENSG00000198690
ENSG00000249242	ENSG00000137073
ENSG00000079819	ENSG00000148337
ENSG00000079819	ENSG00000172732
ENSG00000079819	ENSG00000125656
ENSG00000123119	ENSG00000110107
ENSG00000249242	ENSG00000047230
ENSG00000249242	ENSG00000147224
ENSG00000123119	ENSG00000111581
ENSG00000249242	ENSG00000152359
ENSG00000249242	ENSG00000136813
ENSG00000249242	ENSG00000138802
ENSG00000079819	ENSG00000101246
ENSG00000079819	ENSG00000179262
ENSG00000079819	ENSG00000055950
ENSG00000079819	ENSG00000140391
ENSG00000249242	ENSG00000168172
ENSG00000249242	ENSG00000136026
ENSG00000079819	ENSG00000170291
ENSG00000249242	ENSG00000139842
ENSG00000215039	ENSG00000031823
ENSG00000249242	ENSG00000111880
ENSG00000249242	ENSG00000204574
ENSG00000215039	ENSG00000171552
ENSG00000123119	ENSG00000136738
ENSG00000079819	ENSG00000160294
ENSG00000249242	ENSG00000102181
ENSG00000249242	ENSG00000107951
ENSG00000079819	ENSG00000101126
ENSG00000079819	ENSG00000132507
ENSG00000249242	ENSG00000111666
ENSG00000079819	ENSG00000181929
ENSG00000249242	ENSG00000138592
ENSG00000079819	ENSG00000105618
ENSG00000249242	ENSG00000073578
ENSG00000249242	ENSG00000172869
ENSG00000079819	ENSG00000157837
ENSG00000170017	ENSG00000166233
ENSG00000255248	ENSG00000091542
ENSG00000249242	ENSG00000214413
ENSG00000123119	ENSG00000105723
ENSG00000123119	ENSG00000176915
ENSG00000079819	ENSG00000129245
ENSG00000079819	ENSG00000142396
ENSG00000123119	ENSG00000160193
ENSG00000249242	ENSG00000132646
ENSG00000249242	ENSG00000110395
ENSG00000249242	ENSG00000156471
ENSG00000079819	ENSG00000172057
ENSG00000079819	ENSG00000135452
ENSG00000079819	ENSG00000171204
ENSG00000249242	ENSG00000101266
ENSG00000079819	ENSG00000161016
ENSG00000079819	ENSG00000166037
ENSG00000249242	ENSG00000196867
ENSG00000079819	ENSG00000159210
ENSG00000249242	ENSG00000184708
ENSG00000079819	ENSG00000167881
ENSG00000079819	ENSG00000083520
ENSG00000249242	ENSG00000157593
[truncated: 288 more rows]

## Sheet: Cluster_5
GCN Cluster 5
ENSG00000114209	ENSG00000215039
ENSG00000079819	ENSG00000110917
ENSG00000129187	ENSG00000152137
ENSG00000249242	ENSG00000137409
ENSG00000010270	ENSG00000131171
ENSG00000169991	ENSG00000249242
ENSG00000156052	ENSG00000215039
ENSG00000115350	ENSG00000255248
ENSG00000079819	ENSG00000081377
ENSG00000157911	ENSG00000131171
ENSG00000123119	ENSG00000211584
ENSG00000079819	ENSG00000122378
ENSG00000249242	ENSG00000110841
ENSG00000215039	ENSG00000214046
ENSG00000079819	ENSG00000184226
ENSG00000171148	ENSG00000154447
ENSG00000006451	ENSG00000131171
ENSG00000249242	ENSG00000166123
ENSG00000158828	ENSG00000170017
ENSG00000104671	ENSG00000215039
ENSG00000112977	ENSG00000079819
ENSG00000185043	ENSG00000131171
ENSG00000249242	ENSG00000113231
ENSG00000079819	ENSG00000082641
ENSG00000249242	ENSG00000168734
ENSG00000154447	ENSG00000108100
ENSG00000154447	ENSG00000134809
ENSG00000120306	ENSG00000131171
ENSG00000079819	ENSG00000100865
ENSG00000113845	ENSG00000079819
ENSG00000162627	ENSG00000131171
ENSG00000169085	ENSG00000131171
ENSG00000070367	ENSG00000131171
ENSG00000123119	ENSG00000205531
ENSG00000079819	ENSG00000183576
ENSG00000255529	ENSG00000131171
ENSG00000121900	ENSG00000170017
ENSG00000154447	ENSG00000185437
ENSG00000154447	ENSG00000142168
ENSG00000079819	ENSG00000091947
ENSG00000249242	ENSG00000166888
ENSG00000147586	ENSG00000131171
ENSG00000085760	ENSG00000131171
ENSG00000249242	ENSG00000172379
ENSG00000079819	ENSG00000101363
ENSG00000249242	ENSG00000091592
ENSG00000025796	ENSG00000215039
ENSG00000214194	ENSG00000131171
ENSG00000134248	ENSG00000131171
ENSG00000115350	ENSG00000109576
ENSG00000215039	ENSG00000140319
ENSG00000066027	ENSG00000131171
ENSG00000124767	ENSG00000215039
ENSG00000119328	ENSG00000215039
ENSG00000136603	ENSG00000131171
ENSG00000169499	ENSG00000122378
ENSG00000079819	ENSG00000064115
ENSG00000079819	ENSG00000008018
ENSG00000169976	ENSG00000215039
ENSG00000165672	ENSG00000131171
ENSG00000079819	ENSG00000166272
ENSG00000079819	ENSG00000133313
ENSG00000215039	ENSG00000111237
ENSG00000249242	ENSG00000185043
ENSG00000249242	ENSG00000159128
ENSG00000079819	ENSG00000169976
ENSG00000079819	ENSG00000175387
ENSG00000133313	ENSG00000100364
ENSG00000081377	ENSG00000131171
ENSG00000079819	ENSG00000205155
ENSG00000156475	ENSG00000122378
ENSG00000079819	ENSG00000105700
ENSG00000079819	ENSG00000125375
ENSG00000249242	ENSG00000236609
ENSG00000249242	ENSG00000110104
ENSG00000104671	ENSG00000099308
ENSG00000066583	ENSG00000169499
ENSG00000124767	ENSG00000079819
ENSG00000215039	ENSG00000100528
ENSG00000147526	ENSG00000131171
ENSG00000123119	ENSG00000154059
ENSG00000249242	ENSG00000155115
ENSG00000119878	ENSG00000131171
ENSG00000164713	ENSG00000131171
ENSG00000079819	ENSG00000110442
ENSG00000154447	ENSG00000170043
ENSG00000079819	ENSG00000119328
ENSG00000249242	ENSG00000136908
ENSG00000133983	ENSG00000131171
ENSG00000154447	ENSG00000100605
ENSG00000170017	ENSG00000196422
ENSG00000123119	ENSG00000069535
ENSG00000249242	ENSG00000243678
ENSG00000118363	ENSG00000215039
ENSG00000117174	ENSG00000079819
ENSG00000106785	ENSG00000131171
ENSG00000148834	ENSG00000215039
ENSG00000249242	ENSG00000102572
ENSG00000122378	ENSG00000183723
ENSG00000122378	ENSG00000100364
ENSG00000171148	ENSG00000079819
ENSG00000186283	ENSG00000079819
ENSG00000079819	ENSG00000131171
ENSG00000115350	ENSG00000197448
ENSG00000215039	ENSG00000100567
ENSG00000154447	ENSG00000129187
ENSG00000215039	ENSG00000126749
ENSG00000164096	ENSG00000131171
ENSG00000163637	ENSG00000170017
ENSG00000249242	ENSG00000172889
ENSG00000079819	ENSG00000149357
ENSG00000177576	ENSG00000131171
ENSG00000185187	ENSG00000131171
ENSG00000166272	ENSG00000131171
ENSG00000179933	ENSG00000131171
ENSG00000172985	ENSG00000131171
ENSG00000159461	ENSG00000131171
ENSG00000197568	ENSG00000123119
ENSG00000151893	ENSG00000131171
ENSG00000117174	ENSG00000215039
ENSG00000112977	ENSG00000169499
ENSG00000114902	ENSG00000131171
ENSG00000164405	ENSG00000215039
ENSG00000169085	ENSG00000122378
ENSG00000215039	ENSG00000157617
ENSG00000186283	ENSG00000215039
ENSG00000120705	ENSG00000131171
ENSG00000170017	ENSG00000152767
ENSG00000225921	ENSG00000131171
ENSG00000144566	ENSG00000131171
ENSG00000106400	ENSG00000131171
ENSG00000215039	ENSG00000103121
ENSG00000215039	ENSG00000090013
ENSG00000215039	ENSG00000140391
ENSG00000066583	ENSG00000215039
ENSG00000070614	ENSG00000131171
ENSG00000170017	ENSG00000255248
ENSG00000205707	ENSG00000131171
ENSG00000123119	ENSG00000198157
ENSG00000154447	ENSG00000186010
ENSG00000079819	ENSG00000171792
ENSG00000114353	ENSG00000131171
ENSG00000174574	ENSG00000131171
ENSG00000131508	ENSG00000215039
ENSG00000197894	ENSG00000131171
ENSG00000215039	ENSG00000167088
ENSG00000156639	ENSG00000131171
ENSG00000079819	ENSG00000104131
ENSG00000143252	ENSG00000131171
ENSG00000120658	ENSG00000185437
ENSG00000154447	ENSG00000243678
ENSG00000249242	ENSG00000182809
ENSG00000106028	ENSG00000215039
ENSG00000249242	ENSG00000100413
ENSG00000158186	ENSG00000249242
ENSG00000249242	ENSG00000113296
ENSG00000170017	ENSG00000158106
ENSG00000121900	ENSG00000249242
ENSG00000249242	ENSG00000124225
ENSG00000079819	ENSG00000091640
ENSG00000116459	ENSG00000131171
ENSG00000215039	ENSG00000134153
ENSG00000079819	ENSG00000147010
ENSG00000079819	ENSG00000185437
ENSG00000122378	ENSG00000149547
ENSG00000249242	ENSG00000128185
ENSG00000134153	ENSG00000131171
ENSG00000079819	ENSG00000090013
ENSG00000117411	ENSG00000170017
ENSG00000162961	ENSG00000131171
ENSG00000249242	ENSG00000158106
ENSG00000112679	ENSG00000079819
ENSG00000134248	ENSG00000079819
ENSG00000181061	ENSG00000131171
ENSG00000085760	ENSG00000079819
ENSG00000154447	ENSG00000122378
ENSG00000154978	ENSG00000131171
ENSG00000154447	ENSG00000183978
ENSG00000169499	ENSG00000011454
ENSG00000249242	ENSG00000184047
ENSG00000153406	ENSG00000131171
ENSG00000079819	ENSG00000006715
ENSG00000079819	ENSG00000100364
ENSG00000115350	ENSG00000099308
ENSG00000119328	ENSG00000131171
ENSG00000124767	ENSG00000131171
ENSG00000236609	ENSG00000122378
ENSG00000066583	ENSG00000122378
ENSG00000122378	ENSG00000131171
ENSG00000197448	ENSG00000106785
ENSG00000168894	ENSG00000215039
ENSG00000215039	ENSG00000131171
ENSG00000231721	ENSG00000255248
ENSG00000079819	ENSG00000170043
ENSG00000079819	ENSG00000158526
ENSG00000079819	ENSG00000170296
ENSG00000250317	ENSG00000131171
ENSG00000107341	ENSG00000131171
ENSG00000129187	ENSG00000169085
ENSG00000117419	ENSG00000131171
ENSG00000215039	ENSG00000120860
ENSG00000138363	ENSG00000123119
ENSG00000079819	ENSG00000107341
ENSG00000079819	ENSG00000205707
ENSG00000157911	ENSG00000079819
ENSG00000169499	ENSG00000185437
ENSG00000104671	ENSG00000131171
ENSG00000189077	ENSG00000131171
ENSG00000123119	ENSG00000073060
ENSG00000249242	ENSG00000166171
ENSG00000215039	ENSG00000133983
ENSG00000154813	ENSG00000131171
ENSG00000170017	ENSG00000099785
ENSG00000124380	ENSG00000131171
ENSG00000197448	ENSG00000122378
ENSG00000079819	ENSG00000101444
ENSG00000079819	ENSG00000182771
ENSG00000154447	ENSG00000169223
ENSG00000112977	ENSG00000255248
ENSG00000160049	ENSG00000131171
ENSG00000184924	ENSG00000099308
ENSG00000079819	ENSG00000151893
ENSG00000170017	ENSG00000130311
ENSG00000154447	ENSG00000101363
ENSG00000163138	ENSG00000131171
ENSG00000127922	ENSG00000131171
ENSG00000123119	ENSG00000104823
ENSG00000152137	ENSG00000133313
ENSG00000162627	ENSG00000079819
ENSG00000113845	ENSG00000131171
ENSG00000143753	ENSG00000131171
ENSG00000079819	ENSG00000022277
ENSG00000170348	ENSG00000131171
ENSG00000112977	ENSG00000131171
ENSG00000079819	ENSG00000157617
ENSG00000129187	ENSG00000131171
ENSG00000249242	ENSG00000106484
ENSG00000079819	ENSG00000011454
ENSG00000119729	ENSG00000131171
ENSG00000154447	ENSG00000185825
ENSG00000174574	ENSG00000079819
ENSG00000255248	ENSG00000185437
ENSG00000006715	ENSG00000131171
ENSG00000079819	ENSG00000184428
ENSG00000149357	ENSG00000131171
ENSG00000106028	ENSG00000131171
ENSG00000154447	ENSG00000169085
ENSG00000143252	ENSG00000215039
ENSG00000041880	ENSG00000131171
ENSG00000197568	ENSG00000131171
ENSG00000170385	ENSG00000249242
ENSG00000162734	ENSG00000131171
ENSG00000104695	ENSG00000131171
ENSG00000131508	ENSG00000131171
ENSG00000170390	ENSG00000123119
ENSG00000049656	ENSG00000079819
ENSG00000170017	ENSG00000079819
ENSG00000169085	ENSG00000108100
ENSG00000164096	ENSG00000123119
ENSG00000174574	ENSG00000215039
ENSG00000079819	ENSG00000007520
ENSG00000154447	ENSG00000131171
ENSG00000204370	ENSG00000131171
ENSG00000079819	ENSG00000166337
ENSG00000115350	ENSG00000100364
ENSG00000215039	ENSG00000090487
ENSG00000169964	ENSG00000131171
ENSG00000066583	ENSG00000131171
ENSG00000143252	ENSG00000079819
ENSG00000215039	ENSG00000175387
ENSG00000114850	ENSG00000131171
ENSG00000115350	ENSG00000120658
ENSG00000215039	ENSG00000205155
ENSG00000152137	ENSG00000131171
ENSG00000178057	ENSG00000079819
ENSG00000163382	ENSG00000122378
ENSG00000079819	ENSG00000159461
ENSG00000215039	ENSG00000168701
ENSG00000079819	ENSG00000118363
ENSG00000005238	ENSG00000131171
ENSG00000177556	ENSG00000131171
ENSG00000215039	ENSG00000111229
ENSG00000144566	ENSG00000215039
ENSG00000215039	ENSG00000123728
ENSG00000079819	ENSG00000214046
ENSG00000120705	ENSG00000215039
ENSG00000249242	ENSG00000186187
ENSG00000123119	ENSG00000103485
ENSG00000164237	ENSG00000123119
ENSG00000122378	ENSG00000105700
ENSG00000123119	ENSG00000183723
ENSG00000079819	ENSG00000236609
ENSG00000079819	ENSG00000002919
ENSG00000215039	ENSG00000132963
ENSG00000035862	ENSG00000131171
ENSG00000114902	ENSG00000215039
ENSG00000117174	ENSG00000131171
ENSG00000133313	ENSG00000131171
ENSG00000143252	ENSG00000099308
ENSG00000079819	ENSG00000159128
ENSG00000166272	ENSG00000215039
ENSG00000215039	ENSG00000131475
ENSG00000225921	ENSG00000079819
ENSG00000079819	ENSG00000105669
ENSG00000134809	ENSG00000215039
ENSG00000249242	ENSG00000128294
ENSG00000197448	ENSG00000131171
ENSG00000123119	ENSG00000129521
ENSG00000173163	ENSG00000215039
ENSG00000145293	ENSG00000131171
ENSG00000079819	ENSG00000152137
ENSG00000120705	ENSG00000079819
ENSG00000230989	ENSG00000131171
ENSG00000123119	ENSG00000185437
ENSG00000249242	ENSG00000157045
ENSG00000170017	ENSG00000129187
ENSG00000084073	ENSG00000131171
ENSG00000197448	ENSG00000255248
ENSG00000114902	ENSG00000079819
ENSG00000158828	ENSG00000099308
ENSG00000158828	ENSG00000123119
ENSG00000122378	ENSG00000133313
ENSG00000112977	ENSG00000122378
ENSG00000002919	ENSG00000131171
ENSG00000126106	ENSG00000079819
